# Supplementary material for: Endometrial cancer risk and survival by tumor MMR status
Source: PubMed Central journal article supplement — J Gynecol Oncol. 2018 Feb 23;29(3):e39. doi: 10.3802/jgo.2018.29.e39 (PMC5920223; doi:10.3802/jgo.2018.29.e39), 2018-02-23
Supplement: jgo-29-e39-s001.pdf [file jgo-29-e39-s001.pdf]

**Supplementary Table 1. Details for 79 genes differentially expressed between germline MMR deficient and assumed somatic MMR deficient tumors**

| Gene             | Up/Down regulated in somatic MMR deficient tumours | Fold change | p-value  | Adjusted p-value |
|------------------|----------------------------------------------------|-------------|----------|------------------|
| <i>CACNA1S</i>   | Up                                                 | 166719      | 1.15E-22 | 2.07E-18         |
| <i>AMBN</i>      | Up                                                 | 289245      | 1.03E-17 | 9.27E-14         |
| <i>UTP20</i>     | Down                                               | 0.15        | 8.54E-12 | 5.14E-08         |
| <i>TEX19</i>     | Down                                               | 0.02        | 4.81E-10 | 1.73E-06         |
| <i>ZC3H12C</i>   | Up                                                 | 7.54        | 3.88E-10 | 1.73E-06         |
| <i>DEFA5</i>     | Up                                                 | 153027      | 3.19E-09 | 9.60E-06         |
| <i>ZNF385B</i>   | Up                                                 | 59.75       | 4.43E-09 | 1.14E-05         |
| <i>PGPEP1L</i>   | Down                                               | 0.02        | 3.80E-08 | 7.62E-05         |
| <i>FSCN3</i>     | Down                                               | 0.21        | 3.53E-08 | 7.62E-05         |
| <i>NOTUM</i>     | Up                                                 | 90.93       | 8.79E-08 | 1.59E-04         |
| <i>MEGF11</i>    | Up                                                 | 25.56       | 1.28E-07 | 2.10E-04         |
| <i>LRRTM1</i>    | Up                                                 | 27.65       | 1.39E-07 | 2.10E-04         |
| <i>GPX2</i>      | Up                                                 | 67.55       | 4.88E-07 | 6.77E-04         |
| <i>C1QTNF9B</i>  | Down                                               | 0.09        | 1.01E-06 | 1.05E-03         |
| <i>EPM2AIP1</i>  | Down                                               | 0.22        | 8.36E-07 | 1.05E-03         |
| <i>MLH1</i>      | Down                                               | 0.26        | 1.02E-06 | 1.05E-03         |
| <i>PALM3</i>     | Up                                                 | 12.43       | 9.42E-07 | 1.05E-03         |
| <i>OBP2B</i>     | Up                                                 | 404.38      | 1.05E-06 | 1.05E-03         |
| <i>ATRNL1</i>    | Up                                                 | 21.00       | 1.58E-06 | 1.50E-03         |
| <i>DEFB4A</i>    | Up                                                 | 64.94       | 1.98E-06 | 1.78E-03         |
| <i>TSPAN33</i>   | Up                                                 | 3.86        | 2.26E-06 | 1.94E-03         |
| <i>HAS3</i>      | Up                                                 | 10.30       | 2.37E-06 | 1.95E-03         |
| <i>CRYBB1</i>    | Up                                                 | 22.63       | 5.78E-06 | 4.53E-03         |
| <i>LOC441454</i> | Down                                               | 0.16        | 6.55E-06 | 4.71E-03         |
| <i>CLU</i>       | Up                                                 | 10.43       | 6.59E-06 | 4.71E-03         |
| <i>SEMA5B</i>    | Up                                                 | 10.91       | 6.79E-06 | 4.71E-03         |
| <i>CYP24A1</i>   | Up                                                 | 20.68       | 9.70E-06 | 6.48E-03         |
| <i>OBP2A</i>     | Up                                                 | 98.07       | 1.40E-05 | 8.71E-03         |
| <i>DKK4</i>      | Up                                                 | 277.09      | 1.38E-05 | 8.71E-03         |
| <i>PGBD5</i>     | Up                                                 | 8.56        | 1.49E-05 | 8.93E-03         |
| <i>PDLIM5</i>    | Down                                               | 0.39        | 1.94E-05 | 0.011            |
| <i>LOC723809</i> | Up                                                 | 26.33       | 1.93E-05 | 0.011            |
| <i>BEX5</i>      | Up                                                 | 13.71       | 2.47E-05 | 0.013            |
| <i>GABRG3</i>    | Up                                                 | 54.97       | 2.56E-05 | 0.013            |
| <i>NEDD4</i>     | Up                                                 | 3.14        | 2.94E-05 | 0.014            |
| <i>CES3</i>      | Up                                                 | 8.66        | 2.96E-05 | 0.014            |
| <i>CES1</i>      | Up                                                 | 17.32       | 2.76E-05 | 0.014            |
| <i>C10orf99</i>  | Up                                                 | 24.15       | 2.87E-05 | 0.014            |
| <i>TUBA4A</i>    | Up                                                 | 4.79        | 3.48E-05 | 0.016            |
| <i>PRKX</i>      | Down                                               | 0.37        | 4.35E-05 | 0.019            |
| <i>C2CD4A</i>    | Up                                                 | 9.83        | 5.67E-05 | 0.024            |
| <i>KANK1</i>     | Up                                                 | 2.64        | 5.97E-05 | 0.025            |
| <i>CPLX3</i>     | Up                                                 | 44.91       | 6.41E-05 | 0.026            |
| <i>POMC</i>      | Down                                               | 0.11        | 6.96E-05 | 0.028            |
| <i>PRKY</i>      | Down                                               | 0.33        | 7.05E-05 | 0.028            |

|                   |      |       |          |       |
|-------------------|------|-------|----------|-------|
| <i>NCRNA00116</i> | Up   | 9.89  | 7.79E-05 | 0.029 |
| <i>SAA1</i>       | Up   | 13.92 | 7.65E-05 | 0.029 |
| <i>LPO</i>        | Up   | 17.13 | 7.96E-05 | 0.029 |
| <i>PCOLCE2</i>    | Up   | 13.46 | 8.72E-05 | 0.031 |
| <i>PI3</i>        | Up   | 14.12 | 9.07E-05 | 0.031 |
| <i>ZIC1</i>       | Up   | 22.40 | 8.90E-05 | 0.031 |
| <i>ME1</i>        | Up   | 6.91  | 1.03E-04 | 0.034 |
| <i>ATP6V0A4</i>   | Up   | 13.61 | 1.01E-04 | 0.034 |
| <i>C9orf66</i>    | Up   | 8.58  | 1.08E-04 | 0.035 |
| <i>LGR6</i>       | Up   | 13.41 | 1.10E-04 | 0.035 |
| <i>C6orf126</i>   | Up   | 21.85 | 1.07E-04 | 0.035 |
| <i>CX3CL1</i>     | Up   | 4.30  | 1.19E-04 | 0.037 |
| <i>SAA2</i>       | Up   | 13.16 | 1.19E-04 | 0.037 |
| <i>PDZK1IP1</i>   | Up   | 8.68  | 1.27E-04 | 0.038 |
| <i>HIVEP3</i>     | Up   | 3.00  | 1.38E-04 | 0.039 |
| <i>LRRC55</i>     | Up   | 11.63 | 1.39E-04 | 0.039 |
| <i>ACCN1</i>      | Up   | 12.72 | 1.32E-04 | 0.039 |
| <i>TMEM72</i>     | Up   | 16.90 | 1.43E-04 | 0.039 |
| <i>S100A7</i>     | Up   | 55.12 | 1.39E-04 | 0.039 |
| <i>TNNT2</i>      | Up   | 10.79 | 1.48E-04 | 0.039 |
| <i>BCL11A</i>     | Up   | 4.50  | 1.54E-04 | 0.040 |
| <i>C3orf45</i>    | Down | 0.12  | 1.83E-04 | 0.045 |
| <i>PRR19</i>      | Down | 0.42  | 1.82E-04 | 0.045 |
| <i>GPA33</i>      | Up   | 13.79 | 1.84E-04 | 0.045 |
| <i>RNF128</i>     | Up   | 23.45 | 1.85E-04 | 0.045 |
| <i>LMAN1L</i>     | Up   | 76.06 | 1.80E-04 | 0.045 |
| <i>THSD7B</i>     | Down | 0.12  | 2.02E-04 | 0.046 |
| <i>GBP3</i>       | Up   | 3.49  | 1.96E-04 | 0.046 |
| <i>B3GNT8</i>     | Up   | 5.18  | 2.06E-04 | 0.046 |
| <i>PDZK1</i>      | Up   | 9.98  | 1.98E-04 | 0.046 |
| <i>CHI3L2</i>     | Up   | 10.06 | 2.01E-04 | 0.046 |
| <i>EDAR</i>       | Up   | 10.38 | 2.04E-04 | 0.046 |
| <i>CYP2A6</i>     | Down | 0.05  | 2.17E-04 | 0.048 |
| <i>DST</i>        | Down | 0.24  | 2.19E-04 | 0.048 |

---
