# Supplementary material for: Endometrial cancer risk and survival by tumor MMR status
Source: PubMed Central journal article supplement — J Gynecol Oncol. 2018 Feb 23;29(3):e39. doi: 10.3802/jgo.2018.29.e39 (PMC5920223; doi:10.3802/jgo.2018.29.e39), 2018-02-23
Supplement: jgo-29-e39-s003.pdf [file jgo-29-e39-s003.pdf]

**Supplementary Table 3. Details for 1,218 genes differentially expressed between assumed somatic MMR deficient and MMR proficient tumors**

| Gene            | Up/Down regulated in somatic MMR deficient tumors | Fold change | p-value  | Adjusted p-value |
|-----------------|---------------------------------------------------|-------------|----------|------------------|
| <i>EPM2AIP1</i> | Down                                              | 0.22        | 1.99E-73 | 3.83E-69         |
| <i>MLH1</i>     | Down                                              | 0.27        | 1.87E-67 | 1.80E-63         |
| <i>CRTAC1</i>   | Down                                              | 0.05        | 1.08E-51 | 6.95E-48         |
| <i>RNLS</i>     | Down                                              | 0.25        | 2.61E-45 | 1.26E-41         |
| <i>TRH</i>      | Down                                              | 0.03        | 1.88E-42 | 7.24E-39         |
| <i>MYH7B</i>    | Down                                              | 0.08        | 7.26E-41 | 2.32E-37         |
| <i>HIF3A</i>    | Down                                              | 0.10        | 1.11E-39 | 3.06E-36         |
| <i>IGF2</i>     | Down                                              | 0.11        | 1.16E-36 | 2.80E-33         |
| <i>ZNF311</i>   | Down                                              | 0.18        | 1.13E-32 | 2.41E-29         |
| <i>EYA4</i>     | Down                                              | 0.04        | 1.41E-32 | 2.71E-29         |
| <i>ZNF334</i>   | Down                                              | 0.16        | 8.68E-32 | 1.52E-28         |
| <i>PRSS50</i>   | Down                                              | 0.11        | 2.47E-31 | 3.96E-28         |
| <i>ZNF300</i>   | Down                                              | 0.22        | 1.64E-30 | 2.43E-27         |
| <i>IGLON5</i>   | Down                                              | 0.12        | 1.03E-29 | 1.41E-26         |
| <i>JPH3</i>     | Down                                              | 0.14        | 4.30E-29 | 5.49E-26         |
| <i>SLC13A5</i>  | Down                                              | 0.12        | 4.57E-29 | 5.49E-26         |
| <i>LHX1</i>     | Down                                              | 0.03        | 6.55E-29 | 7.40E-26         |
| <i>C4orf39</i>  | Down                                              | 0.23        | 1.04E-28 | 1.11E-25         |
| <i>ADAMTS16</i> | Down                                              | 0.16        | 1.39E-28 | 1.41E-25         |
| <i>TCAM1P</i>   | Down                                              | 0.07        | 1.88E-28 | 1.81E-25         |
| <i>CLDN6</i>    | Down                                              | 0.06        | 3.27E-28 | 2.99E-25         |
| <i>WNT6</i>     | Down                                              | 0.17        | 9.97E-28 | 8.34E-25         |
| <i>CRB2</i>     | Down                                              | 0.18        | 9.99E-28 | 8.34E-25         |
| <i>KLK6</i>     | Down                                              | 0.13        | 1.40E-27 | 1.12E-24         |
| <i>CACNA2D3</i> | Down                                              | 0.23        | 2.73E-27 | 2.09E-24         |
| <i>C7orf13</i>  | Down                                              | 0.28        | 2.83E-27 | 2.09E-24         |
| <i>ZNF662</i>   | Down                                              | 0.28        | 3.43E-27 | 2.44E-24         |
| <i>WNT16</i>    | Down                                              | 0.12        | 8.08E-27 | 5.54E-24         |
| <i>IQCA1</i>    | Down                                              | 0.19        | 8.36E-27 | 5.54E-24         |
| <i>LIX1</i>     | Down                                              | 0.11        | 1.04E-26 | 6.67E-24         |
| <i>L1CAM</i>    | Down                                              | 0.11        | 1.56E-26 | 9.67E-24         |
| <i>PNMA3</i>    | Down                                              | 0.14        | 1.96E-26 | 1.18E-23         |
| <i>SOX11</i>    | Down                                              | 0.10        | 2.43E-26 | 1.41E-23         |
| <i>KLK7</i>     | Down                                              | 0.11        | 7.86E-26 | 4.44E-23         |
| <i>NEFH</i>     | Down                                              | 0.15        | 8.34E-26 | 4.58E-23         |
| <i>SLC6A10P</i> | Down                                              | 0.21        | 1.57E-25 | 8.39E-23         |
| <i>SNCG</i>     | Down                                              | 0.22        | 1.78E-25 | 9.26E-23         |
| <i>IGF2AS</i>   | Down                                              | 0.09        | 7.22E-25 | 3.65E-22         |
| <i>DOK5</i>     | Down                                              | 0.25        | 2.01E-24 | 9.89E-22         |
| <i>CELF4</i>    | Down                                              | 0.24        | 3.82E-24 | 1.84E-21         |
| <i>CYTL1</i>    | Down                                              | 0.18        | 6.63E-24 | 3.11E-21         |
| <i>TRO</i>      | Down                                              | 0.28        | 1.24E-23 | 5.67E-21         |
| <i>KCNK9</i>    | Down                                              | 0.15        | 1.44E-23 | 6.43E-21         |
| <i>PCSK1N</i>   | Down                                              | 0.21        | 3.13E-23 | 1.37E-20         |

|                  |      |      |          |          |
|------------------|------|------|----------|----------|
| <i>DLGAP3</i>    | Down | 0.19 | 9.64E-23 | 4.12E-20 |
| <i>CACNA1S</i>   | Down | 0.05 | 2.74E-22 | 1.14E-19 |
| <i>KLK8</i>      | Down | 0.14 | 3.14E-22 | 1.28E-19 |
| <i>PTX3</i>      | Down | 0.25 | 5.09E-22 | 2.04E-19 |
| <i>BMP7</i>      | Down | 0.23 | 6.61E-22 | 2.54E-19 |
| <i>SMC1B</i>     | Down | 0.21 | 6.74E-22 | 2.54E-19 |
| <i>XAGE2</i>     | Down | 0.01 | 1.43E-21 | 5.28E-19 |
| <i>C1orf59</i>   | Down | 0.36 | 6.54E-21 | 2.37E-18 |
| <i>SLFN13</i>    | Down | 0.32 | 6.72E-21 | 2.39E-18 |
| <i>RSPO4</i>     | Down | 0.14 | 6.94E-21 | 2.42E-18 |
| <i>FOLR3</i>     | Down | 0.09 | 1.18E-20 | 4.04E-18 |
| <i>SLC6A13</i>   | Down | 0.18 | 1.65E-20 | 5.55E-18 |
| <i>MYT1</i>      | Down | 0.12 | 1.74E-20 | 5.76E-18 |
| <i>INS-IGF2</i>  | Down | 0.14 | 1.77E-20 | 5.76E-18 |
| <i>COL9A3</i>    | Down | 0.20 | 1.84E-20 | 5.90E-18 |
| <i>FGF8</i>      | Down | 0.11 | 1.87E-20 | 5.90E-18 |
| <i>TMEM163</i>   | Down | 0.32 | 2.79E-20 | 8.39E-18 |
| <i>KLK5</i>      | Down | 0.11 | 2.80E-20 | 8.39E-18 |
| <i>IQSEC3</i>    | Down | 0.30 | 3.17E-20 | 9.37E-18 |
| <i>NTF3</i>      | Down | 0.26 | 4.11E-20 | 1.20E-17 |
| <i>RPL22L1</i>   | Up   | 2.05 | 4.86E-20 | 1.39E-17 |
| <i>NHLRC1</i>    | Down | 0.46 | 5.95E-20 | 1.68E-17 |
| <i>KISS1R</i>    | Up   | 4.45 | 6.59E-20 | 1.83E-17 |
| <i>CLDN9</i>     | Down | 0.21 | 7.00E-20 | 1.92E-17 |
| <i>PNOC</i>      | Down | 0.15 | 1.12E-19 | 3.04E-17 |
| <i>BCAM</i>      | Down | 0.36 | 1.42E-19 | 3.80E-17 |
| <i>KCNA6</i>     | Down | 0.25 | 1.67E-19 | 4.40E-17 |
| <i>ZNF229</i>    | Down | 0.23 | 2.61E-19 | 6.78E-17 |
| <i>LOC729799</i> | Down | 0.42 | 2.72E-19 | 6.96E-17 |
| <i>DEFA5</i>     | Down | 0.01 | 3.20E-19 | 8.09E-17 |
| <i>RNF182</i>    | Down | 0.21 | 3.30E-19 | 8.23E-17 |
| <i>MYLPF</i>     | Down | 0.31 | 3.63E-19 | 8.94E-17 |
| <i>SLC6A15</i>   | Down | 0.08 | 4.11E-19 | 9.86E-17 |
| <i>PPARGC1A</i>  | Down | 0.22 | 7.35E-19 | 1.74E-16 |
| <i>SLCO1A2</i>   | Down | 0.30 | 8.24E-19 | 1.93E-16 |
| <i>AJAP1</i>     | Down | 0.21 | 8.53E-19 | 1.98E-16 |
| <i>H19</i>       | Down | 0.22 | 1.95E-18 | 4.47E-16 |
| <i>C18orf18</i>  | Down | 0.37 | 2.10E-18 | 4.74E-16 |
| <i>FSTL4</i>     | Down | 0.24 | 2.38E-18 | 5.31E-16 |
| <i>RNF212</i>    | Down | 0.19 | 2.59E-18 | 5.66E-16 |
| <i>CNTFR</i>     | Down | 0.18 | 2.59E-18 | 5.66E-16 |
| <i>WNT10A</i>    | Down | 0.26 | 3.45E-18 | 7.45E-16 |
| <i>ERP27</i>     | Down | 0.31 | 3.65E-18 | 7.70E-16 |
| <i>WIT1</i>      | Down | 0.23 | 3.81E-18 | 7.89E-16 |
| <i>NKD1</i>      | Down | 0.23 | 3.82E-18 | 7.89E-16 |
| <i>CPXM2</i>     | Down | 0.29 | 3.95E-18 | 8.07E-16 |
| <i>GAL3ST3</i>   | Down | 0.12 | 4.42E-18 | 8.95E-16 |
| <i>ZBTB46</i>    | Down | 0.46 | 5.03E-18 | 1.01E-15 |
| <i>ACTL8</i>     | Down | 0.14 | 5.34E-18 | 1.06E-15 |
| <i>ALS2CR11</i>  | Down | 0.21 | 6.62E-18 | 1.29E-15 |

|                  |      |      |          |          |
|------------------|------|------|----------|----------|
| <i>PIPOX</i>     | Down | 0.33 | 6.73E-18 | 1.29E-15 |
| <i>VCX</i>       | Down | 0.19 | 6.97E-18 | 1.33E-15 |
| <i>WT1</i>       | Down | 0.22 | 9.02E-18 | 1.70E-15 |
| <i>ADAMTSL2</i>  | Down | 0.29 | 1.06E-17 | 1.97E-15 |
| <i>SLCO3A1</i>   | Down | 0.42 | 1.16E-17 | 2.14E-15 |
| <i>CHRNA3</i>    | Down | 0.24 | 1.82E-17 | 3.33E-15 |
| <i>ODZ4</i>      | Down | 0.36 | 1.99E-17 | 3.60E-15 |
| <i>CDKN2A</i>    | Down | 0.31 | 2.07E-17 | 3.72E-15 |
| <i>PAPLN</i>     | Down | 0.42 | 2.13E-17 | 3.78E-15 |
| <i>DLK1</i>      | Down | 0.05 | 2.76E-17 | 4.87E-15 |
| <i>LOC440173</i> | Down | 0.35 | 3.12E-17 | 5.46E-15 |
| <i>COL22A1</i>   | Down | 0.24 | 3.17E-17 | 5.48E-15 |
| <i>GRB7</i>      | Down | 0.41 | 3.37E-17 | 5.77E-15 |
| <i>SUSD3</i>     | Down | 0.39 | 3.52E-17 | 5.93E-15 |
| <i>VASN</i>      | Down | 0.44 | 4.50E-17 | 7.46E-15 |
| <i>SST</i>       | Down | 0.11 | 4.67E-17 | 7.61E-15 |
| <i>GFRA1</i>     | Down | 0.25 | 4.67E-17 | 7.61E-15 |
| <i>C10orf114</i> | Down | 0.30 | 4.98E-17 | 8.04E-15 |
| <i>FIGNL2</i>    | Down | 0.30 | 5.64E-17 | 8.95E-15 |
| <i>SLC7A10</i>   | Down | 0.15 | 6.12E-17 | 9.64E-15 |
| <i>HEPHL1</i>    | Down | 0.23 | 6.58E-17 | 1.03E-14 |
| <i>LOC339290</i> | Down | 0.43 | 1.13E-16 | 1.75E-14 |
| <i>LOC84856</i>  | Down | 0.32 | 1.20E-16 | 1.84E-14 |
| <i>LOC441666</i> | Down | 0.23 | 1.21E-16 | 1.85E-14 |
| <i>SYCP2</i>     | Down | 0.33 | 1.32E-16 | 1.99E-14 |
| <i>SCGB1D4</i>   | Down | 0.08 | 1.39E-16 | 2.09E-14 |
| <i>MUCL1</i>     | Down | 0.10 | 1.45E-16 | 2.17E-14 |
| <i>ADHFE1</i>    | Down | 0.39 | 1.56E-16 | 2.30E-14 |
| <i>CHODL</i>     | Down | 0.31 | 1.73E-16 | 2.54E-14 |
| <i>KCNT1</i>     | Down | 0.17 | 2.07E-16 | 3.01E-14 |
| <i>RFPL1S</i>    | Down | 0.27 | 2.09E-16 | 3.02E-14 |
| <i>FAM110B</i>   | Down | 0.36 | 2.48E-16 | 3.56E-14 |
| <i>TTYH1</i>     | Down | 0.34 | 2.53E-16 | 3.60E-14 |
| <i>FMO2</i>      | Down | 0.18 | 2.77E-16 | 3.88E-14 |
| <i>TMPRSS6</i>   | Down | 0.24 | 3.93E-16 | 5.43E-14 |
| <i>RGS22</i>     | Down | 0.22 | 4.72E-16 | 6.47E-14 |
| <i>TCAP</i>      | Down | 0.38 | 5.59E-16 | 7.61E-14 |
| <i>PNMAL2</i>    | Down | 0.41 | 5.93E-16 | 8.02E-14 |
| <i>RGS9</i>      | Down | 0.34 | 6.04E-16 | 8.12E-14 |
| <i>EIF5A2</i>    | Down | 0.40 | 6.24E-16 | 8.28E-14 |
| <i>TMEM176A</i>  | Down | 0.39 | 6.29E-16 | 8.28E-14 |
| <i>LRRC4C</i>    | Down | 0.29 | 6.31E-16 | 8.28E-14 |
| <i>PTPRT</i>     | Down | 0.15 | 6.36E-16 | 8.28E-14 |
| <i>ZIK1</i>      | Down | 0.33 | 6.38E-16 | 8.28E-14 |
| <i>GPR155</i>    | Down | 0.42 | 6.72E-16 | 8.65E-14 |
| <i>PCDH10</i>    | Down | 0.20 | 6.79E-16 | 8.65E-14 |
| <i>TMEFF2</i>    | Down | 0.12 | 6.80E-16 | 8.65E-14 |
| <i>psiTPTE22</i> | Down | 0.42 | 7.52E-16 | 9.51E-14 |
| <i>NPR1</i>      | Down | 0.34 | 7.84E-16 | 9.85E-14 |
| <i>NKAIN4</i>    | Down | 0.21 | 8.05E-16 | 1.00E-13 |

|                 |      |      |          |          |
|-----------------|------|------|----------|----------|
| <i>CACNG6</i>   | Down | 0.18 | 8.70E-16 | 1.08E-13 |
| <i>ALK</i>      | Down | 0.24 | 9.08E-16 | 1.12E-13 |
| <i>DDX25</i>    | Down | 0.13 | 1.00E-15 | 1.22E-13 |
| <i>DBC1</i>     | Down | 0.22 | 1.15E-15 | 1.40E-13 |
| <i>ALKBH3</i>   | Down | 0.48 | 1.34E-15 | 1.62E-13 |
| <i>KLK4</i>     | Down | 0.20 | 1.36E-15 | 1.64E-13 |
| <i>NFE2</i>     | Down | 0.38 | 1.47E-15 | 1.76E-13 |
| <i>DBH</i>      | Down | 0.20 | 1.61E-15 | 1.90E-13 |
| <i>BNC1</i>     | Down | 0.13 | 1.75E-15 | 2.07E-13 |
| <i>STK31</i>    | Down | 0.39 | 1.80E-15 | 2.10E-13 |
| <i>TSPYL5</i>   | Down | 0.34 | 1.95E-15 | 2.27E-13 |
| <i>ALOX12P2</i> | Down | 0.23 | 2.03E-15 | 2.35E-13 |
| <i>TWIST2</i>   | Down | 0.33 | 2.52E-15 | 2.90E-13 |
| <i>IL23A</i>    | Down | 0.42 | 2.72E-15 | 3.11E-13 |
| <i>COL11A2</i>  | Down | 0.36 | 2.79E-15 | 3.17E-13 |
| <i>FRMPD1</i>   | Down | 0.18 | 3.12E-15 | 3.50E-13 |
| <i>RELN</i>     | Down | 0.21 | 3.19E-15 | 3.56E-13 |
| <i>MYCL1</i>    | Down | 0.50 | 3.42E-15 | 3.80E-13 |
| <i>AVPR2</i>    | Down | 0.30 | 3.68E-15 | 4.06E-13 |
| <i>CPVL</i>     | Down | 0.41 | 3.91E-15 | 4.29E-13 |
| <i>SCN11A</i>   | Down | 0.37 | 4.01E-15 | 4.38E-13 |
| <i>SORCS2</i>   | Down | 0.32 | 4.04E-15 | 4.39E-13 |
| <i>ADRA1B</i>   | Down | 0.28 | 4.45E-15 | 4.77E-13 |
| <i>MAGEH1</i>   | Down | 0.49 | 4.74E-15 | 5.06E-13 |
| <i>CNNM1</i>    | Down | 0.30 | 4.80E-15 | 5.10E-13 |
| <i>CDH6</i>     | Down | 0.30 | 5.17E-15 | 5.46E-13 |
| <i>ATP8A2</i>   | Down | 0.31 | 5.98E-15 | 6.27E-13 |
| <i>TMEM108</i>  | Down | 0.30 | 7.35E-15 | 7.68E-13 |
| <i>C2orf74</i>  | Down | 0.41 | 8.34E-15 | 8.61E-13 |
| <i>ANO2</i>     | Down | 0.41 | 8.77E-15 | 8.99E-13 |
| <i>S100A5</i>   | Down | 0.23 | 9.99E-15 | 1.02E-12 |
| <i>SPAG6</i>    | Down | 0.11 | 1.08E-14 | 1.09E-12 |
| <i>VCX3A</i>    | Down | 0.25 | 1.10E-14 | 1.10E-12 |
| <i>NPTX2</i>    | Down | 0.36 | 1.33E-14 | 1.32E-12 |
| <i>FXD7</i>     | Down | 0.23 | 1.35E-14 | 1.34E-12 |
| <i>CALML3</i>   | Down | 0.12 | 1.42E-14 | 1.40E-12 |
| <i>PDE6G</i>    | Down | 0.32 | 1.58E-14 | 1.55E-12 |
| <i>C6orf155</i> | Down | 0.38 | 1.65E-14 | 1.60E-12 |
| <i>ATP6V1B1</i> | Down | 0.32 | 1.70E-14 | 1.65E-12 |
| <i>TP53TG3B</i> | Down | 0.18 | 1.71E-14 | 1.65E-12 |
| <i>DPEP1</i>    | Down | 0.24 | 1.87E-14 | 1.80E-12 |
| <i>CACNA1E</i>  | Down | 0.27 | 2.10E-14 | 2.01E-12 |
| <i>GAMT</i>     | Up   | 2.53 | 2.18E-14 | 2.07E-12 |
| <i>COL6A4P2</i> | Down | 0.29 | 2.19E-14 | 2.07E-12 |
| <i>ZNF285</i>   | Down | 0.36 | 2.37E-14 | 2.23E-12 |
| <i>PNMT</i>     | Down | 0.25 | 2.51E-14 | 2.35E-12 |
| <i>CALHM3</i>   | Down | 0.22 | 2.53E-14 | 2.36E-12 |
| <i>ATOH8</i>    | Down | 0.40 | 2.61E-14 | 2.42E-12 |
| <i>FAM24B</i>   | Down | 0.31 | 2.81E-14 | 2.58E-12 |
| <i>CST2</i>     | Down | 0.18 | 2.81E-14 | 2.58E-12 |

|              |      |      |          |          |
|--------------|------|------|----------|----------|
| LY6H         | Down | 0.27 | 2.92E-14 | 2.67E-12 |
| C16orf73     | Down | 0.15 | 3.10E-14 | 2.82E-12 |
| LOC100240726 | Down | 0.09 | 3.43E-14 | 3.11E-12 |
| SCN3B        | Down | 0.33 | 4.01E-14 | 3.62E-12 |
| VGLL1        | Down | 0.27 | 4.37E-14 | 3.93E-12 |
| ADAMTS14     | Down | 0.44 | 4.80E-14 | 4.29E-12 |
| PLAG1        | Down | 0.34 | 4.94E-14 | 4.39E-12 |
| PLAC1        | Down | 0.24 | 5.14E-14 | 4.54E-12 |
| SOX30        | Down | 0.40 | 5.17E-14 | 4.54E-12 |
| ZNF717       | Down | 0.43 | 5.19E-14 | 4.54E-12 |
| IL13RA2      | Down | 0.27 | 5.20E-14 | 4.54E-12 |
| BTBD17       | Down | 0.08 | 6.29E-14 | 5.40E-12 |
| LOC728819    | Down | 0.41 | 7.20E-14 | 6.14E-12 |
| C9orf125     | Down | 0.31 | 7.29E-14 | 6.18E-12 |
| DOCK3        | Down | 0.38 | 7.30E-14 | 6.18E-12 |
| C3orf59      | Down | 0.48 | 9.26E-14 | 7.77E-12 |
| CD36         | Down | 0.34 | 9.39E-14 | 7.84E-12 |
| MX2          | Down | 0.43 | 9.52E-14 | 7.91E-12 |
| CDKN2B       | Down | 0.49 | 1.05E-13 | 8.64E-12 |
| TMEM176B     | Down | 0.45 | 1.07E-13 | 8.74E-12 |
| C8orf85      | Down | 0.25 | 1.08E-13 | 8.83E-12 |
| PYGM         | Down | 0.43 | 1.13E-13 | 9.12E-12 |
| SNAP91       | Down | 0.23 | 1.16E-13 | 9.33E-12 |
| CST4         | Down | 0.16 | 1.17E-13 | 9.39E-12 |
| BMP4         | Down | 0.31 | 1.49E-13 | 1.18E-11 |
| TYRP1        | Down | 0.26 | 1.61E-13 | 1.28E-11 |
| PEBP4        | Down | 0.22 | 1.69E-13 | 1.34E-11 |
| ZNF135       | Down | 0.43 | 1.90E-13 | 1.50E-11 |
| PVALB        | Down | 0.24 | 2.00E-13 | 1.57E-11 |
| DTNA         | Down | 0.37 | 2.28E-13 | 1.77E-11 |
| APCDD1L      | Down | 0.26 | 2.30E-13 | 1.78E-11 |
| SCN4A        | Down | 0.27 | 2.88E-13 | 2.22E-11 |
| VCX3B        | Down | 0.26 | 2.98E-13 | 2.29E-11 |
| GALNT13      | Down | 0.26 | 3.07E-13 | 2.35E-11 |
| MPV17L       | Down | 0.33 | 3.09E-13 | 2.36E-11 |
| CXorf49B     | Down | 0.24 | 3.53E-13 | 2.68E-11 |
| CYP26C1      | Down | 0.21 | 3.56E-13 | 2.69E-11 |
| LOC643719    | Down | 0.43 | 4.00E-13 | 3.01E-11 |
| CELA3A       | Up   | 4.10 | 4.24E-13 | 3.18E-11 |
| CHAD         | Down | 0.44 | 4.55E-13 | 3.40E-11 |
| IL10         | Down | 0.36 | 4.58E-13 | 3.40E-11 |
| ZNF716       | Down | 0.14 | 4.58E-13 | 3.40E-11 |
| SYT1         | Down | 0.33 | 4.64E-13 | 3.43E-11 |
| IRS2         | Down | 0.42 | 5.41E-13 | 3.99E-11 |
| LOXL4        | Down | 0.43 | 5.55E-13 | 4.07E-11 |
| IMPG2        | Down | 0.35 | 5.74E-13 | 4.19E-11 |
| GCGR         | Down | 0.16 | 7.77E-13 | 5.61E-11 |
| HOTAIR       | Up   | 4.04 | 7.86E-13 | 5.66E-11 |
| NRG3         | Down | 0.18 | 7.98E-13 | 5.72E-11 |
| SCN5A        | Down | 0.41 | 8.10E-13 | 5.78E-11 |

|                      |      |      |          |          |
|----------------------|------|------|----------|----------|
| <i>SEZ6L</i>         | Down | 0.18 | 8.19E-13 | 5.80E-11 |
| <i>OR56A3</i>        | Down | 0.08 | 9.47E-13 | 6.66E-11 |
| <i>GSPT2</i>         | Down | 0.41 | 9.79E-13 | 6.86E-11 |
| <i>SLC6A11</i>       | Down | 0.13 | 1.06E-12 | 7.43E-11 |
| <i>KCNJ12</i>        | Down | 0.32 | 1.13E-12 | 7.89E-11 |
| <i>WNT7A</i>         | Down | 0.25 | 1.14E-12 | 7.94E-11 |
| <i>SLC14A2</i>       | Down | 0.33 | 1.15E-12 | 7.97E-11 |
| <i>SHANK1</i>        | Down | 0.31 | 1.24E-12 | 8.56E-11 |
| <i>KRTDAP</i>        | Down | 0.31 | 1.25E-12 | 8.58E-11 |
| <i>LRCH2</i>         | Down | 0.37 | 1.27E-12 | 8.67E-11 |
| <i>DKFZp686A1627</i> | Down | 0.12 | 1.33E-12 | 9.03E-11 |
| <i>FER1L5</i>        | Down | 0.33 | 1.45E-12 | 9.79E-11 |
| <i>RASL11B</i>       | Down | 0.37 | 1.47E-12 | 9.85E-11 |
| <i>EPHX3</i>         | Down | 0.32 | 1.48E-12 | 9.93E-11 |
| <i>CDO1</i>          | Down | 0.30 | 1.53E-12 | 1.02E-10 |
| <i>ADRA1D</i>        | Down | 0.32 | 1.91E-12 | 1.27E-10 |
| <i>MAG</i>           | Down | 0.22 | 1.92E-12 | 1.27E-10 |
| <i>GPR83</i>         | Down | 0.32 | 2.01E-12 | 1.32E-10 |
| <i>C2orf43</i>       | Down | 0.49 | 2.05E-12 | 1.34E-10 |
| <i>COL8A2</i>        | Down | 0.41 | 2.34E-12 | 1.52E-10 |
| <i>HAPLN4</i>        | Down | 0.36 | 2.46E-12 | 1.58E-10 |
| <i>NGB</i>           | Down | 0.15 | 2.61E-12 | 1.67E-10 |
| <i>CACNA1A</i>       | Down | 0.45 | 2.63E-12 | 1.68E-10 |
| <i>EPHB2</i>         | Down | 0.45 | 2.77E-12 | 1.76E-10 |
| <i>C9orf70</i>       | Down | 0.32 | 2.81E-12 | 1.78E-10 |
| <i>ABHD12B</i>       | Down | 0.25 | 2.92E-12 | 1.84E-10 |
| <i>PCDHA10</i>       | Down | 0.29 | 3.25E-12 | 2.05E-10 |
| <i>SFRP5</i>         | Down | 0.22 | 3.31E-12 | 2.08E-10 |
| <i>HCG4</i>          | Down | 0.27 | 3.39E-12 | 2.12E-10 |
| <i>SLC8A1</i>        | Down | 0.47 | 3.43E-12 | 2.14E-10 |
| <i>NUDT11</i>        | Down | 0.38 | 3.48E-12 | 2.15E-10 |
| <i>BEX2</i>          | Down | 0.44 | 3.49E-12 | 2.15E-10 |
| <i>FBLN2</i>         | Down | 0.41 | 3.49E-12 | 2.15E-10 |
| <i>SLC8A3</i>        | Down | 0.26 | 3.50E-12 | 2.15E-10 |
| <i>RBP1</i>          | Down | 0.44 | 3.67E-12 | 2.25E-10 |
| <i>COL9A1</i>        | Down | 0.22 | 3.73E-12 | 2.28E-10 |
| <i>RASSF10</i>       | Down | 0.36 | 4.31E-12 | 2.63E-10 |
| <i>RYR1</i>          | Down | 0.37 | 4.32E-12 | 2.63E-10 |
| <i>FXVD1</i>         | Down | 0.36 | 4.54E-12 | 2.75E-10 |
| <i>C6orf114</i>      | Down | 0.47 | 4.95E-12 | 2.99E-10 |
| <i>SGCG</i>          | Down | 0.23 | 4.96E-12 | 2.99E-10 |
| <i>THSD4</i>         | Down | 0.40 | 5.06E-12 | 3.04E-10 |
| <i>FLJ16779</i>      | Down | 0.29 | 5.30E-12 | 3.17E-10 |
| <i>MYL3</i>          | Down | 0.34 | 5.77E-12 | 3.44E-10 |
| <i>LY6G6C</i>        | Down | 0.18 | 5.78E-12 | 3.44E-10 |
| <i>HGC6.3</i>        | Down | 0.25 | 5.85E-12 | 3.47E-10 |
| <i>CD22</i>          | Down | 0.35 | 6.02E-12 | 3.55E-10 |
| <i>GPR19</i>         | Down | 0.44 | 6.25E-12 | 3.67E-10 |
| <i>CALML5</i>        | Down | 0.18 | 6.77E-12 | 3.97E-10 |
| <i>ERAS</i>          | Down | 0.38 | 6.86E-12 | 4.00E-10 |

|                  |      |      |          |          |
|------------------|------|------|----------|----------|
| <i>DEFA6</i>     | Down | 0.03 | 6.87E-12 | 4.00E-10 |
| <i>ELOVL2</i>    | Down | 0.37 | 6.96E-12 | 4.04E-10 |
| <i>PRRT4</i>     | Down | 0.34 | 7.11E-12 | 4.11E-10 |
| <i>FGF12</i>     | Down | 0.37 | 7.15E-12 | 4.13E-10 |
| <i>HOXC9</i>     | Up   | 4.98 | 7.58E-12 | 4.36E-10 |
| <i>FBXL21</i>    | Down | 0.07 | 7.71E-12 | 4.42E-10 |
| <i>CPNE9</i>     | Down | 0.35 | 8.94E-12 | 5.08E-10 |
| <i>FOXI3</i>     | Down | 0.13 | 9.75E-12 | 5.52E-10 |
| <i>IGDCC3</i>    | Down | 0.29 | 9.83E-12 | 5.55E-10 |
| <i>C7orf61</i>   | Down | 0.48 | 9.89E-12 | 5.57E-10 |
| <i>SORCS1</i>    | Down | 0.31 | 1.02E-11 | 5.71E-10 |
| <i>SDR16C5</i>   | Down | 0.25 | 1.03E-11 | 5.78E-10 |
| <i>RUNX2</i>     | Down | 0.44 | 1.04E-11 | 5.79E-10 |
| <i>CHST13</i>    | Down | 0.38 | 1.17E-11 | 6.53E-10 |
| <i>NPY</i>       | Down | 0.13 | 1.20E-11 | 6.64E-10 |
| <i>NOTUM</i>     | Down | 0.22 | 1.20E-11 | 6.65E-10 |
| <i>CYP2A6</i>    | Down | 0.21 | 1.22E-11 | 6.72E-10 |
| <i>GPR64</i>     | Down | 0.29 | 1.26E-11 | 6.90E-10 |
| <i>DNAJC12</i>   | Down | 0.42 | 1.29E-11 | 7.06E-10 |
| <i>ANKRD33</i>   | Down | 0.19 | 1.32E-11 | 7.19E-10 |
| <i>POU2F3</i>    | Down | 0.42 | 1.33E-11 | 7.21E-10 |
| <i>ZFP42</i>     | Down | 0.06 | 1.34E-11 | 7.24E-10 |
| <i>SLCO6A1</i>   | Down | 0.11 | 1.36E-11 | 7.34E-10 |
| <i>UPK1A</i>     | Down | 0.28 | 1.39E-11 | 7.46E-10 |
| <i>SDR42E1</i>   | Down | 0.39 | 1.48E-11 | 7.93E-10 |
| <i>MYO16</i>     | Down | 0.31 | 1.58E-11 | 8.42E-10 |
| <i>TRIM71</i>    | Down | 0.15 | 1.62E-11 | 8.51E-10 |
| <i>CLDN2</i>     | Down | 0.23 | 1.62E-11 | 8.51E-10 |
| <i>GPR173</i>    | Down | 0.42 | 1.82E-11 | 9.52E-10 |
| <i>CLCNKA</i>    | Down | 0.43 | 1.84E-11 | 9.60E-10 |
| <i>ZNF772</i>    | Down | 0.47 | 1.94E-11 | 1.01E-09 |
| <i>HTR2C</i>     | Down | 0.10 | 1.95E-11 | 1.01E-09 |
| <i>CUZD1</i>     | Down | 0.36 | 1.99E-11 | 1.02E-09 |
| <i>GDPD2</i>     | Down | 0.29 | 2.00E-11 | 1.03E-09 |
| <i>CBLN2</i>     | Down | 0.21 | 2.30E-11 | 1.18E-09 |
| <i>ONECUT1</i>   | Up   | 4.32 | 2.33E-11 | 1.19E-09 |
| <i>EDN3</i>      | Down | 0.23 | 2.45E-11 | 1.24E-09 |
| <i>THSD7B</i>    | Down | 0.36 | 2.61E-11 | 1.32E-09 |
| <i>TDRD12</i>    | Down | 0.23 | 2.64E-11 | 1.33E-09 |
| <i>PTGER1</i>    | Down | 0.35 | 2.71E-11 | 1.36E-09 |
| <i>NBPF4</i>     | Down | 0.18 | 2.80E-11 | 1.40E-09 |
| <i>DCAF12L1</i>  | Down | 0.23 | 3.16E-11 | 1.57E-09 |
| <i>TMEM132C</i>  | Down | 0.22 | 3.17E-11 | 1.57E-09 |
| <i>SLC6A12</i>   | Down | 0.37 | 3.21E-11 | 1.59E-09 |
| <i>FLJ36000</i>  | Down | 0.10 | 3.45E-11 | 1.70E-09 |
| <i>TNMD</i>      | Down | 0.22 | 3.73E-11 | 1.83E-09 |
| <i>KIAA1239</i>  | Down | 0.14 | 3.98E-11 | 1.95E-09 |
| <i>LOC400043</i> | Down | 0.34 | 4.21E-11 | 2.05E-09 |
| <i>LOC284749</i> | Down | 0.26 | 4.42E-11 | 2.15E-09 |
| <i>NBPF6</i>     | Down | 0.16 | 4.83E-11 | 2.34E-09 |

|                  |      |      |          |          |
|------------------|------|------|----------|----------|
| <i>GABRB2</i>    | Down | 0.30 | 4.98E-11 | 2.40E-09 |
| <i>PRRG3</i>     | Down | 0.20 | 5.04E-11 | 2.43E-09 |
| <i>RGN</i>       | Down | 0.39 | 5.18E-11 | 2.48E-09 |
| <i>LOC286467</i> | Down | 0.34 | 5.21E-11 | 2.49E-09 |
| <i>ANKRD34C</i>  | Down | 0.20 | 5.67E-11 | 2.70E-09 |
| <i>GABRE</i>     | Down | 0.40 | 5.69E-11 | 2.70E-09 |
| <i>KBTBD12</i>   | Down | 0.37 | 5.70E-11 | 2.70E-09 |
| <i>ADAM33</i>    | Down | 0.37 | 6.07E-11 | 2.87E-09 |
| <i>KCNJ4</i>     | Down | 0.27 | 6.32E-11 | 2.97E-09 |
| <i>PHOSPHO1</i>  | Down | 0.39 | 6.37E-11 | 2.98E-09 |
| <i>CNR1</i>      | Down | 0.35 | 6.46E-11 | 3.02E-09 |
| <i>ADARB2</i>    | Down | 0.34 | 6.61E-11 | 3.08E-09 |
| <i>TGM1</i>      | Down | 0.44 | 7.17E-11 | 3.33E-09 |
| <i>IGFBPL1</i>   | Down | 0.35 | 7.32E-11 | 3.40E-09 |
| <i>KRT85</i>     | Down | 0.21 | 7.39E-11 | 3.42E-09 |
| <i>FBXO17</i>    | Down | 0.40 | 7.40E-11 | 3.42E-09 |
| <i>NDST3</i>     | Down | 0.33 | 7.42E-11 | 3.42E-09 |
| <i>SLC7A8</i>    | Down | 0.49 | 7.63E-11 | 3.51E-09 |
| <i>C9orf84</i>   | Down | 0.30 | 7.93E-11 | 3.63E-09 |
| <i>UPK3B</i>     | Down | 0.42 | 8.06E-11 | 3.68E-09 |
| <i>PSD2</i>      | Down | 0.39 | 8.49E-11 | 3.87E-09 |
| <i>FAM133A</i>   | Down | 0.16 | 8.66E-11 | 3.93E-09 |
| <i>USP44</i>     | Down | 0.42 | 8.85E-11 | 4.01E-09 |
| <i>MAGEA10</i>   | Down | 0.06 | 9.05E-11 | 4.09E-09 |
| <i>BHMT2</i>     | Down | 0.39 | 9.48E-11 | 4.27E-09 |
| <i>KCNIP1</i>    | Down | 0.37 | 9.57E-11 | 4.30E-09 |
| <i>TCEAL5</i>    | Down | 0.37 | 9.70E-11 | 4.33E-09 |
| <i>MEG3</i>      | Down | 0.41 | 9.71E-11 | 4.33E-09 |
| <i>LAMC3</i>     | Down | 0.49 | 9.79E-11 | 4.35E-09 |
| <i>CCBE1</i>     | Down | 0.29 | 1.05E-10 | 4.63E-09 |
| <i>ADCY8</i>     | Down | 0.08 | 1.18E-10 | 5.18E-09 |
| <i>GABRQ</i>     | Down | 0.23 | 1.18E-10 | 5.18E-09 |
| <i>C8orf46</i>   | Down | 0.44 | 1.24E-10 | 5.41E-09 |
| <i>GPR17</i>     | Down | 0.39 | 1.28E-10 | 5.59E-09 |
| <i>RASGRF1</i>   | Down | 0.33 | 1.28E-10 | 5.59E-09 |
| <i>HPSE2</i>     | Down | 0.26 | 1.31E-10 | 5.68E-09 |
| <i>MS4A15</i>    | Down | 0.30 | 1.50E-10 | 6.47E-09 |
| <i>APCDD1</i>    | Down | 0.42 | 1.54E-10 | 6.64E-09 |
| <i>MSMB</i>      | Down | 0.18 | 1.64E-10 | 7.01E-09 |
| <i>ZNF506</i>    | Down | 0.50 | 1.75E-10 | 7.44E-09 |
| <i>NTRK3</i>     | Down | 0.40 | 1.84E-10 | 7.76E-09 |
| <i>XAGE1D</i>    | Down | 0.08 | 1.93E-10 | 8.09E-09 |
| <i>MGC2889</i>   | Down | 0.34 | 1.96E-10 | 8.21E-09 |
| <i>GPR81</i>     | Down | 0.48 | 1.97E-10 | 8.23E-09 |
| <i>TFR2</i>      | Up   | 2.17 | 2.01E-10 | 8.36E-09 |
| <i>C5orf38</i>   | Down | 0.24 | 2.07E-10 | 8.59E-09 |
| <i>LG12</i>      | Down | 0.45 | 2.12E-10 | 8.79E-09 |
| <i>SDK1</i>      | Down | 0.49 | 2.13E-10 | 8.83E-09 |
| <i>MEOX1</i>     | Down | 0.36 | 2.42E-10 | 9.84E-09 |
| <i>CECR2</i>     | Down | 0.37 | 2.42E-10 | 9.84E-09 |



|                 |      |      |          |          |
|-----------------|------|------|----------|----------|
| <i>SUSD4</i>    | Down | 0.45 | 2.77E-10 | 1.12E-08 |
| <i>NTSR1</i>    | Down | 0.32 | 2.80E-10 | 1.13E-08 |
| <i>CDH20</i>    | Down | 0.33 | 2.84E-10 | 1.14E-08 |
| <i>KREMEN1</i>  | Down | 0.50 | 2.87E-10 | 1.15E-08 |
| <i>BHLHE41</i>  | Down | 0.49 | 2.93E-10 | 1.16E-08 |
| <i>GRIK5</i>    | Down | 0.38 | 3.13E-10 | 1.24E-08 |
| <i>CLCNKB</i>   | Down | 0.44 | 3.19E-10 | 1.26E-08 |
| <i>PDE6B</i>    | Down | 0.42 | 3.34E-10 | 1.30E-08 |
| <i>MYOD1</i>    | Down | 0.13 | 3.55E-10 | 1.38E-08 |
| <i>FAM19A5</i>  | Down | 0.43 | 3.65E-10 | 1.41E-08 |
| <i>NEFL</i>     | Down | 0.26 | 3.93E-10 | 1.51E-08 |
| <i>C6orf123</i> | Down | 0.32 | 4.16E-10 | 1.60E-08 |
| <i>SLITRK4</i>  | Down | 0.28 | 4.17E-10 | 1.60E-08 |
| <i>SCXB</i>     | Down | 0.42 | 4.24E-10 | 1.62E-08 |
| <i>ATP2B3</i>   | Down | 0.29 | 4.26E-10 | 1.63E-08 |
| <i>TNNT3</i>    | Down | 0.23 | 4.40E-10 | 1.68E-08 |
| <i>FGF3</i>     | Down | 0.12 | 4.43E-10 | 1.68E-08 |
| <i>CHL1</i>     | Down | 0.33 | 4.43E-10 | 1.68E-08 |
| <i>ANKLE1</i>   | Down | 0.44 | 4.48E-10 | 1.70E-08 |
| <i>KNG1</i>     | Down | 0.22 | 4.59E-10 | 1.73E-08 |
| <i>GAGE4</i>    | Down | 0.06 | 4.84E-10 | 1.82E-08 |
| <i>C18orf2</i>  | Down | 0.18 | 4.92E-10 | 1.85E-08 |
| <i>SPON1</i>    | Down | 0.35 | 5.00E-10 | 1.88E-08 |
| <i>NRAP</i>     | Down | 0.36 | 5.56E-10 | 2.08E-08 |
| <i>ATP1A4</i>   | Down | 0.27 | 5.59E-10 | 2.09E-08 |
| <i>GCK</i>      | Down | 0.35 | 5.91E-10 | 2.20E-08 |
| <i>C1orf114</i> | Down | 0.39 | 6.06E-10 | 2.25E-08 |
| <i>PTPN5</i>    | Down | 0.29 | 6.37E-10 | 2.35E-08 |
| <i>ANKRD7</i>   | Down | 0.30 | 6.42E-10 | 2.37E-08 |
| <i>MAP7D2</i>   | Down | 0.41 | 7.59E-10 | 2.78E-08 |
| <i>KCNA2</i>    | Down | 0.33 | 7.71E-10 | 2.82E-08 |
| <i>NLGN1</i>    | Down | 0.33 | 7.74E-10 | 2.82E-08 |
| <i>BEX5</i>     | Up   | 2.80 | 7.76E-10 | 2.82E-08 |
| <i>NKD2</i>     | Down | 0.42 | 7.79E-10 | 2.83E-08 |
| <i>ZNF727</i>   | Down | 0.39 | 7.85E-10 | 2.85E-08 |
| <i>TMEM195</i>  | Down | 0.21 | 7.97E-10 | 2.88E-08 |
| <i>TH</i>       | Down | 0.36 | 8.51E-10 | 3.07E-08 |
| <i>GFRA3</i>    | Down | 0.31 | 8.52E-10 | 3.07E-08 |
| <i>FAM178B</i>  | Down | 0.40 | 9.21E-10 | 3.31E-08 |
| <i>MAL</i>      | Down | 0.32 | 9.22E-10 | 3.31E-08 |
| <i>BEST3</i>    | Down | 0.23 | 9.82E-10 | 3.50E-08 |
| <i>HRASLS</i>   | Down | 0.41 | 9.90E-10 | 3.51E-08 |
| <i>CTAG1B</i>   | Down | 0.07 | 1.08E-09 | 3.83E-08 |
| <i>HPDL</i>     | Down | 0.44 | 1.11E-09 | 3.92E-08 |
| <i>MGC16121</i> | Down | 0.47 | 1.19E-09 | 4.14E-08 |
| <i>GALNT8</i>   | Down | 0.27 | 1.19E-09 | 4.15E-08 |
| <i>CT45A3</i>   | Down | 0.16 | 1.24E-09 | 4.29E-08 |
| <i>TRPM5</i>    | Down | 0.35 | 1.30E-09 | 4.48E-08 |
| <i>SLC30A3</i>  | Down | 0.35 | 1.32E-09 | 4.54E-08 |
| <i>SRCRB4D</i>  | Down | 0.45 | 1.33E-09 | 4.58E-08 |

|                     |      |      |          |          |
|---------------------|------|------|----------|----------|
| <i>MYOZ1</i>        | Down | 0.38 | 1.34E-09 | 4.60E-08 |
| <i>PROX1</i>        | Down | 0.34 | 1.35E-09 | 4.60E-08 |
| <i>NRG2</i>         | Down | 0.45 | 1.35E-09 | 4.62E-08 |
| <i>AMBN</i>         | Down | 0.11 | 1.55E-09 | 5.30E-08 |
| <i>ELOVL4</i>       | Down | 0.46 | 1.59E-09 | 5.41E-08 |
| <i>GABRR1</i>       | Down | 0.35 | 1.64E-09 | 5.58E-08 |
| <i>Mar-11</i>       | Down | 0.11 | 1.86E-09 | 6.31E-08 |
| <i>PTGS2</i>        | Up   | 2.72 | 1.88E-09 | 6.33E-08 |
| <i>C3orf67</i>      | Down | 0.41 | 1.95E-09 | 6.55E-08 |
| <i>PLXNA4</i>       | Down | 0.37 | 1.97E-09 | 6.61E-08 |
| <i>TSPAN7</i>       | Down | 0.47 | 2.02E-09 | 6.75E-08 |
| <i>AKR1C4</i>       | Up   | 3.06 | 2.05E-09 | 6.81E-08 |
| <i>CACNG4</i>       | Down | 0.36 | 2.06E-09 | 6.82E-08 |
| <i>ZDBF2</i>        | Down | 0.44 | 2.28E-09 | 7.51E-08 |
| <i>CPAMD8</i>       | Down | 0.46 | 2.38E-09 | 7.83E-08 |
| <i>HTR1E</i>        | Down | 0.17 | 2.38E-09 | 7.83E-08 |
| <i>NGFR</i>         | Down | 0.42 | 2.40E-09 | 7.88E-08 |
| <i>HOXC6</i>        | Up   | 3.19 | 2.46E-09 | 8.04E-08 |
| <i>NUDT9P1</i>      | Down | 0.47 | 2.53E-09 | 8.26E-08 |
| <i>SYT14</i>        | Down | 0.25 | 2.60E-09 | 8.46E-08 |
| <i>GPR26</i>        | Down | 0.18 | 2.60E-09 | 8.46E-08 |
| <i>FAM43B</i>       | Down | 0.43 | 2.61E-09 | 8.46E-08 |
| <i>HOXC11</i>       | Up   | 3.93 | 2.62E-09 | 8.48E-08 |
| <i>SCG5</i>         | Down | 0.45 | 2.63E-09 | 8.48E-08 |
| <i>GSTA1</i>        | Down | 0.35 | 2.63E-09 | 8.48E-08 |
| <i>HPD</i>          | Down | 0.38 | 2.64E-09 | 8.49E-08 |
| <i>ASTN1</i>        | Down | 0.38 | 2.69E-09 | 8.62E-08 |
| <i>SP5</i>          | Down | 0.34 | 2.75E-09 | 8.79E-08 |
| <i>KCNQ5</i>        | Down | 0.34 | 2.76E-09 | 8.81E-08 |
| <i>NPFFR2</i>       | Down | 0.17 | 2.92E-09 | 9.24E-08 |
| <i>SEMA6D</i>       | Down | 0.49 | 3.07E-09 | 9.70E-08 |
| <i>CDKL2</i>        | Down | 0.43 | 3.13E-09 | 9.86E-08 |
| <i>SALL4</i>        | Down | 0.42 | 3.22E-09 | 1.01E-07 |
| <i>FOXN1</i>        | Down | 0.33 | 3.26E-09 | 1.02E-07 |
| <i>LOC100302640</i> | Down | 0.43 | 3.36E-09 | 1.05E-07 |
| <i>DEPDC7</i>       | Down | 0.46 | 3.39E-09 | 1.06E-07 |
| <i>RNF165</i>       | Down | 0.46 | 3.49E-09 | 1.08E-07 |
| <i>DKK4</i>         | Down | 0.14 | 3.85E-09 | 1.18E-07 |
| <i>SNX32</i>        | Down | 0.44 | 3.96E-09 | 1.21E-07 |
| <i>KRT31</i>        | Down | 0.19 | 3.96E-09 | 1.21E-07 |
| <i>GRIN2B</i>       | Down | 0.26 | 3.98E-09 | 1.22E-07 |
| <i>TUBA3D</i>       | Down | 0.32 | 4.07E-09 | 1.24E-07 |
| <i>KCNE1L</i>       | Down | 0.42 | 4.18E-09 | 1.27E-07 |
| <i>TPH1</i>         | Down | 0.26 | 4.19E-09 | 1.28E-07 |
| <i>KLK3</i>         | Down | 0.27 | 4.30E-09 | 1.31E-07 |
| <i>OSBPL6</i>       | Down | 0.40 | 4.57E-09 | 1.38E-07 |
| <i>COLEC10</i>      | Down | 0.42 | 4.66E-09 | 1.40E-07 |
| <i>LRRN4</i>        | Down | 0.41 | 4.66E-09 | 1.40E-07 |
| <i>NAP1L6</i>       | Down | 0.26 | 4.72E-09 | 1.42E-07 |
| <i>LOC399815</i>    | Down | 0.33 | 4.92E-09 | 1.47E-07 |

|                     |      |      |          |          |
|---------------------|------|------|----------|----------|
| <i>CDH22</i>        | Down | 0.29 | 4.99E-09 | 1.49E-07 |
| <i>ITM2C</i>        | Down | 0.50 | 5.06E-09 | 1.51E-07 |
| <i>JSRP1</i>        | Up   | 2.37 | 5.21E-09 | 1.55E-07 |
| <i>TMEM90B</i>      | Down | 0.39 | 5.31E-09 | 1.58E-07 |
| <i>C1QL2</i>        | Down | 0.17 | 5.37E-09 | 1.59E-07 |
| <i>BHMT</i>         | Down | 0.40 | 5.48E-09 | 1.62E-07 |
| <i>CCDC155</i>      | Down | 0.40 | 5.48E-09 | 1.62E-07 |
| <i>CLSTN2</i>       | Down | 0.46 | 5.84E-09 | 1.72E-07 |
| <i>TDRD10</i>       | Down | 0.46 | 5.85E-09 | 1.72E-07 |
| <i>WNT11</i>        | Down | 0.40 | 5.93E-09 | 1.74E-07 |
| <i>PXDN</i>         | Down | 0.48 | 5.99E-09 | 1.75E-07 |
| <i>KIAA1383</i>     | Down | 0.45 | 6.00E-09 | 1.75E-07 |
| <i>C9orf173</i>     | Down | 0.37 | 6.27E-09 | 1.82E-07 |
| <i>GAB4</i>         | Down | 0.11 | 6.42E-09 | 1.86E-07 |
| <i>CT45A1</i>       | Down | 0.17 | 6.57E-09 | 1.90E-07 |
| <i>MAP3K15</i>      | Down | 0.35 | 7.18E-09 | 2.06E-07 |
| <i>GPIHBP1</i>      | Down | 0.42 | 7.31E-09 | 2.09E-07 |
| <i>LOC254559</i>    | Down | 0.38 | 7.38E-09 | 2.10E-07 |
| <i>SLC19A3</i>      | Down | 0.36 | 7.57E-09 | 2.15E-07 |
| <i>TXNDC3</i>       | Down | 0.42 | 7.74E-09 | 2.20E-07 |
| <i>ABCA17P</i>      | Down | 0.38 | 7.84E-09 | 2.22E-07 |
| <i>CT45A2</i>       | Down | 0.14 | 8.14E-09 | 2.29E-07 |
| <i>EBF3</i>         | Down | 0.42 | 8.35E-09 | 2.35E-07 |
| <i>LOC100133469</i> | Down | 0.05 | 8.42E-09 | 2.36E-07 |
| <i>LRRN2</i>        | Down | 0.42 | 8.50E-09 | 2.38E-07 |
| <i>HMGCLL1</i>      | Down | 0.28 | 8.80E-09 | 2.46E-07 |
| <i>NAA11</i>        | Down | 0.07 | 8.88E-09 | 2.48E-07 |
| <i>AGBL4</i>        | Down | 0.42 | 8.91E-09 | 2.49E-07 |
| <i>MACROD2</i>      | Down | 0.48 | 8.99E-09 | 2.51E-07 |
| <i>ANTXRL</i>       | Down | 0.15 | 9.12E-09 | 2.54E-07 |
| <i>CT45A4</i>       | Down | 0.17 | 9.14E-09 | 2.54E-07 |
| <i>SCN8A</i>        | Down | 0.46 | 9.31E-09 | 2.58E-07 |
| <i>VWA5B1</i>       | Down | 0.33 | 9.42E-09 | 2.61E-07 |
| <i>BMP2</i>         | Up   | 2.19 | 9.47E-09 | 2.62E-07 |
| <i>NKAIN2</i>       | Down | 0.34 | 9.60E-09 | 2.65E-07 |
| <i>CYP2A13</i>      | Down | 0.19 | 9.84E-09 | 2.71E-07 |
| <i>CCDC67</i>       | Down | 0.26 | 9.93E-09 | 2.73E-07 |
| <i>PCDH15</i>       | Down | 0.21 | 9.93E-09 | 2.73E-07 |
| <i>FAT3</i>         | Down | 0.41 | 1.10E-08 | 3.01E-07 |
| <i>CHRNB4</i>       | Down | 0.45 | 1.14E-08 | 3.11E-07 |
| <i>LOC116437</i>    | Down | 0.17 | 1.18E-08 | 3.22E-07 |
| <i>RBM20</i>        | Down | 0.49 | 1.22E-08 | 3.28E-07 |
| <i>C6orf147</i>     | Down | 0.43 | 1.23E-08 | 3.31E-07 |
| <i>LOC389493</i>    | Down | 0.31 | 1.26E-08 | 3.37E-07 |
| <i>OTC</i>          | Down | 0.19 | 1.34E-08 | 3.58E-07 |
| <i>KCNK2</i>        | Down | 0.32 | 1.45E-08 | 3.87E-07 |
| <i>KCNA5</i>        | Down | 0.47 | 1.54E-08 | 4.09E-07 |
| <i>SPAG17</i>       | Down | 0.42 | 1.64E-08 | 4.34E-07 |
| <i>GRIN1</i>        | Up   | 2.12 | 1.65E-08 | 4.36E-07 |
| <i>ACTN2</i>        | Down | 0.40 | 1.66E-08 | 4.36E-07 |

|                  |      |      |          |          |
|------------------|------|------|----------|----------|
| <i>CPEB1</i>     | Down | 0.44 | 1.66E-08 | 4.37E-07 |
| <i>AMBP</i>      | Up   | 2.68 | 1.68E-08 | 4.41E-07 |
| <i>NBPF22P</i>   | Down | 0.46 | 1.71E-08 | 4.48E-07 |
| <i>ZNF883</i>    | Down | 0.46 | 1.72E-08 | 4.50E-07 |
| <i>CCNI2</i>     | Down | 0.46 | 1.77E-08 | 4.62E-07 |
| <i>SYCP2L</i>    | Down | 0.42 | 1.82E-08 | 4.73E-07 |
| <i>C7orf51</i>   | Down | 0.46 | 1.84E-08 | 4.76E-07 |
| <i>CNPY1</i>     | Down | 0.13 | 1.95E-08 | 5.03E-07 |
| <i>GPM6A</i>     | Down | 0.33 | 2.00E-08 | 5.15E-07 |
| <i>LRRTM4</i>    | Down | 0.31 | 2.03E-08 | 5.22E-07 |
| <i>ZNF208</i>    | Down | 0.42 | 2.14E-08 | 5.48E-07 |
| <i>VCX2</i>      | Down | 0.25 | 2.16E-08 | 5.53E-07 |
| <i>NEU4</i>      | Down | 0.38 | 2.18E-08 | 5.55E-07 |
| <i>CCDC158</i>   | Down | 0.44 | 2.22E-08 | 5.63E-07 |
| <i>FGF20</i>     | Down | 0.21 | 2.22E-08 | 5.64E-07 |
| <i>HSPC072</i>   | Down | 0.26 | 2.25E-08 | 5.69E-07 |
| <i>PCDHGB1</i>   | Down | 0.42 | 2.54E-08 | 6.36E-07 |
| <i>MGC4473</i>   | Down | 0.34 | 2.57E-08 | 6.40E-07 |
| <i>CCIN</i>      | Down | 0.45 | 2.57E-08 | 6.40E-07 |
| <i>MME</i>       | Down | 0.49 | 2.60E-08 | 6.48E-07 |
| <i>KRT7</i>      | Down | 0.50 | 2.74E-08 | 6.77E-07 |
| <i>SCN2B</i>     | Down | 0.36 | 2.77E-08 | 6.84E-07 |
| <i>SLC12A5</i>   | Down | 0.47 | 2.90E-08 | 7.12E-07 |
| <i>CHRNA6</i>    | Down | 0.46 | 2.92E-08 | 7.15E-07 |
| <i>MYO3A</i>     | Down | 0.20 | 2.92E-08 | 7.16E-07 |
| <i>SCN1A</i>     | Down | 0.32 | 2.95E-08 | 7.20E-07 |
| <i>FAM5B</i>     | Down | 0.33 | 2.96E-08 | 7.22E-07 |
| <i>HHIP</i>      | Up   | 2.38 | 3.02E-08 | 7.34E-07 |
| <i>POU6F2</i>    | Down | 0.44 | 3.16E-08 | 7.66E-07 |
| <i>SRRM4</i>     | Down | 0.29 | 3.17E-08 | 7.66E-07 |
| <i>SYN2</i>      | Down | 0.36 | 3.28E-08 | 7.91E-07 |
| <i>RHOXF2B</i>   | Down | 0.26 | 3.62E-08 | 8.61E-07 |
| <i>LOC257358</i> | Down | 0.39 | 3.69E-08 | 8.77E-07 |
| <i>LYPD2</i>     | Down | 0.19 | 3.70E-08 | 8.79E-07 |
| <i>OR2W3</i>     | Down | 0.37 | 3.73E-08 | 8.85E-07 |
| <i>PCSK2</i>     | Down | 0.23 | 3.81E-08 | 9.03E-07 |
| <i>PMCH</i>      | Down | 0.34 | 3.87E-08 | 9.15E-07 |
| <i>TMEM132B</i>  | Down | 0.44 | 3.93E-08 | 9.29E-07 |
| <i>HOXC10</i>    | Up   | 4.12 | 3.99E-08 | 9.42E-07 |
| <i>THRB</i>      | Down | 0.50 | 4.10E-08 | 9.63E-07 |
| <i>KLKP1</i>     | Down | 0.26 | 4.13E-08 | 9.69E-07 |
| <i>DCX</i>       | Up   | 3.19 | 4.20E-08 | 9.83E-07 |
| <i>DSCAML1</i>   | Down | 0.38 | 4.22E-08 | 9.87E-07 |
| <i>TRIM58</i>    | Down | 0.41 | 4.70E-08 | 1.09E-06 |
| <i>SPSB4</i>     | Down | 0.37 | 4.70E-08 | 1.09E-06 |
| <i>CT45A5</i>    | Down | 0.18 | 4.95E-08 | 1.15E-06 |
| <i>RFX4</i>      | Down | 0.23 | 5.01E-08 | 1.16E-06 |
| <i>CDH18</i>     | Down | 0.19 | 5.35E-08 | 1.22E-06 |
| <i>BNIPL</i>     | Down | 0.48 | 5.44E-08 | 1.24E-06 |
| <i>SLC5A8</i>    | Down | 0.18 | 5.45E-08 | 1.24E-06 |

|                   |      |      |          |          |
|-------------------|------|------|----------|----------|
| <i>LRRN1</i>      | Down | 0.41 | 5.61E-08 | 1.27E-06 |
| <i>ZNF157</i>     | Down | 0.46 | 5.64E-08 | 1.28E-06 |
| <i>GRM8</i>       | Down | 0.41 | 5.70E-08 | 1.29E-06 |
| <i>PHACTR3</i>    | Down | 0.38 | 5.99E-08 | 1.35E-06 |
| <i>C6orf222</i>   | Down | 0.38 | 6.45E-08 | 1.43E-06 |
| <i>COX6B2</i>     | Down | 0.46 | 6.62E-08 | 1.46E-06 |
| <i>PKDCC</i>      | Up   | 2.04 | 6.66E-08 | 1.47E-06 |
| <i>ZNF98</i>      | Down | 0.46 | 6.71E-08 | 1.48E-06 |
| <i>DNER</i>       | Down | 0.38 | 6.91E-08 | 1.52E-06 |
| <i>PHOX2A</i>     | Down | 0.18 | 6.93E-08 | 1.52E-06 |
| <i>PKIA</i>       | Down | 0.43 | 6.93E-08 | 1.52E-06 |
| <i>MYOT</i>       | Down | 0.39 | 7.13E-08 | 1.55E-06 |
| <i>GABBR2</i>     | Down | 0.43 | 7.14E-08 | 1.55E-06 |
| <i>PCP4</i>       | Down | 0.37 | 7.14E-08 | 1.55E-06 |
| <i>TMEM59L</i>    | Down | 0.44 | 7.30E-08 | 1.58E-06 |
| <i>ANO5</i>       | Down | 0.50 | 7.32E-08 | 1.59E-06 |
| <i>IL19</i>       | Up   | 2.61 | 7.84E-08 | 1.69E-06 |
| <i>C2orf58</i>    | Down | 0.48 | 8.02E-08 | 1.72E-06 |
| <i>LEMD1</i>      | Down | 0.42 | 8.13E-08 | 1.74E-06 |
| <i>LGSN</i>       | Down | 0.33 | 8.22E-08 | 1.76E-06 |
| <i>C3orf14</i>    | Down | 0.50 | 8.35E-08 | 1.79E-06 |
| <i>TGM6</i>       | Down | 0.19 | 8.36E-08 | 1.79E-06 |
| <i>WNT2B</i>      | Down | 0.50 | 8.39E-08 | 1.79E-06 |
| <i>C10orf140</i>  | Down | 0.41 | 8.43E-08 | 1.80E-06 |
| <i>CTXN2</i>      | Down | 0.49 | 8.83E-08 | 1.88E-06 |
| <i>DRD2</i>       | Down | 0.41 | 8.85E-08 | 1.88E-06 |
| <i>PCBP3</i>      | Down | 0.49 | 8.99E-08 | 1.90E-06 |
| <i>ASCL1</i>      | Up   | 3.71 | 9.11E-08 | 1.92E-06 |
| <i>LGALS7B</i>    | Down | 0.46 | 9.33E-08 | 1.96E-06 |
| <i>LPA</i>        | Down | 0.35 | 9.51E-08 | 2.00E-06 |
| <i>DSCR6</i>      | Up   | 2.01 | 9.56E-08 | 2.00E-06 |
| <i>GLRA2</i>      | Down | 0.38 | 9.62E-08 | 2.01E-06 |
| <i>NCRNA00164</i> | Down | 0.39 | 9.82E-08 | 2.05E-06 |
| <i>RAPSN</i>      | Down | 0.45 | 9.94E-08 | 2.08E-06 |
| <i>TGM3</i>       | Up   | 2.28 | 9.97E-08 | 2.08E-06 |
| <i>AKR1B10</i>    | Up   | 2.82 | 1.06E-07 | 2.21E-06 |
| <i>FAM163B</i>    | Down | 0.21 | 1.11E-07 | 2.30E-06 |
| <i>LY6K</i>       | Down | 0.47 | 1.12E-07 | 2.31E-06 |
| <i>PCSK9</i>      | Up   | 2.09 | 1.14E-07 | 2.34E-06 |
| <i>LY6G6E</i>     | Down | 0.26 | 1.17E-07 | 2.41E-06 |
| <i>KCNJ16</i>     | Down | 0.32 | 1.21E-07 | 2.48E-06 |
| <i>LOC285375</i>  | Down | 0.21 | 1.25E-07 | 2.55E-06 |
| <i>LRP2</i>       | Down | 0.32 | 1.26E-07 | 2.56E-06 |
| <i>SPERT</i>      | Down | 0.36 | 1.28E-07 | 2.62E-06 |
| <i>TSG1</i>       | Down | 0.32 | 1.29E-07 | 2.62E-06 |
| <i>LRRTM1</i>     | Down | 0.41 | 1.33E-07 | 2.70E-06 |
| <i>GLB1L3</i>     | Down | 0.38 | 1.33E-07 | 2.71E-06 |
| <i>LCN10</i>      | Down | 0.39 | 1.34E-07 | 2.71E-06 |
| <i>SERPIND1</i>   | Down | 0.38 | 1.44E-07 | 2.89E-06 |
| <i>CUX2</i>       | Down | 0.40 | 1.52E-07 | 3.06E-06 |

|                  |      |      |          |          |
|------------------|------|------|----------|----------|
| <i>HIST1H2BI</i> | Down | 0.44 | 1.56E-07 | 3.12E-06 |
| <i>IGFALS</i>    | Down | 0.44 | 1.56E-07 | 3.13E-06 |
| <i>SSX6</i>      | Down | 0.23 | 1.60E-07 | 3.20E-06 |
| <i>CT45A6</i>    | Down | 0.18 | 1.60E-07 | 3.20E-06 |
| <i>FBXO2</i>     | Down | 0.44 | 1.62E-07 | 3.22E-06 |
| <i>GSTA2</i>     | Down | 0.41 | 1.64E-07 | 3.26E-06 |
| <i>DPT</i>       | Down | 0.42 | 1.64E-07 | 3.26E-06 |
| <i>TULP1</i>     | Down | 0.47 | 1.67E-07 | 3.30E-06 |
| <i>TMEM26</i>    | Down | 0.48 | 1.75E-07 | 3.45E-06 |
| <i>ABO</i>       | Down | 0.37 | 1.78E-07 | 3.50E-06 |
| <i>TMEM63C</i>   | Down | 0.41 | 1.90E-07 | 3.71E-06 |
| <i>PON1</i>      | Down | 0.28 | 1.99E-07 | 3.86E-06 |
| <i>CHD5</i>      | Down | 0.47 | 2.04E-07 | 3.95E-06 |
| <i>GPR158</i>    | Down | 0.36 | 2.09E-07 | 4.05E-06 |
| <i>GOLGA7B</i>   | Down | 0.45 | 2.12E-07 | 4.10E-06 |
| <i>C21orf130</i> | Down | 0.47 | 2.13E-07 | 4.10E-06 |
| <i>LOC255167</i> | Down | 0.35 | 2.13E-07 | 4.10E-06 |
| <i>ZDHHC19</i>   | Down | 0.40 | 2.21E-07 | 4.24E-06 |
| <i>KCNS1</i>     | Down | 0.44 | 2.37E-07 | 4.52E-06 |
| <i>C21orf99</i>  | Down | 0.42 | 2.47E-07 | 4.69E-06 |
| <i>CACNA1I</i>   | Down | 0.41 | 2.58E-07 | 4.87E-06 |
| <i>WBSCR17</i>   | Down | 0.41 | 2.59E-07 | 4.89E-06 |
| <i>IRX6</i>      | Down | 0.30 | 2.64E-07 | 4.98E-06 |
| <i>PCDHGA7</i>   | Down | 0.50 | 2.69E-07 | 5.05E-06 |
| <i>OR1Q1</i>     | Down | 0.29 | 2.73E-07 | 5.12E-06 |
| <i>C11orf36</i>  | Down | 0.26 | 2.85E-07 | 5.31E-06 |
| <i>SSTR1</i>     | Down | 0.44 | 2.88E-07 | 5.36E-06 |
| <i>CPLX3</i>     | Up   | 3.48 | 2.94E-07 | 5.44E-06 |
| <i>S100A1</i>    | Down | 0.42 | 2.95E-07 | 5.46E-06 |
| <i>MAGEL2</i>    | Down | 0.45 | 3.08E-07 | 5.67E-06 |
| <i>SOHLH1</i>    | Down | 0.29 | 3.14E-07 | 5.77E-06 |
| <i>HHLA2</i>     | Down | 0.48 | 3.17E-07 | 5.82E-06 |
| <i>CYP24A1</i>   | Up   | 2.54 | 3.17E-07 | 5.82E-06 |
| <i>NRXN3</i>     | Down | 0.47 | 3.22E-07 | 5.89E-06 |
| <i>MUC4</i>      | Down | 0.39 | 3.41E-07 | 6.21E-06 |
| <i>DKK1</i>      | Down | 0.29 | 3.48E-07 | 6.31E-06 |
| <i>ANKRD26P1</i> | Down | 0.18 | 3.51E-07 | 6.35E-06 |
| <i>FMO3</i>      | Down | 0.45 | 3.52E-07 | 6.37E-06 |
| <i>MKRN3</i>     | Down | 0.25 | 3.63E-07 | 6.53E-06 |
| <i>CORO6</i>     | Down | 0.49 | 3.66E-07 | 6.57E-06 |
| <i>GFRA2</i>     | Down | 0.47 | 4.10E-07 | 7.27E-06 |
| <i>COL6A6</i>    | Down | 0.43 | 4.14E-07 | 7.33E-06 |
| <i>ADD2</i>      | Down | 0.47 | 4.17E-07 | 7.38E-06 |
| <i>IL1A</i>      | Up   | 2.23 | 4.20E-07 | 7.42E-06 |
| <i>TNFSF8</i>    | Down | 0.48 | 4.26E-07 | 7.51E-06 |
| <i>LOC84931</i>  | Down | 0.48 | 4.34E-07 | 7.62E-06 |
| <i>C22orf31</i>  | Down | 0.39 | 4.52E-07 | 7.91E-06 |
| <i>NXF2</i>      | Down | 0.28 | 4.69E-07 | 8.18E-06 |
| <i>NOVA1</i>     | Down | 0.47 | 4.80E-07 | 8.36E-06 |
| <i>LSAMP</i>     | Down | 0.47 | 5.20E-07 | 8.93E-06 |

|                     |      |      |          |          |
|---------------------|------|------|----------|----------|
| <i>KIAA1210</i>     | Down | 0.44 | 5.21E-07 | 8.94E-06 |
| <i>KCNT2</i>        | Down | 0.40 | 5.27E-07 | 9.02E-06 |
| <i>GRIK3</i>        | Down | 0.46 | 5.46E-07 | 9.28E-06 |
| <i>TSHR</i>         | Down | 0.38 | 5.53E-07 | 9.37E-06 |
| <i>ONECUT3</i>      | Up   | 4.23 | 5.68E-07 | 9.60E-06 |
| <i>PRSS21</i>       | Down | 0.37 | 6.32E-07 | 1.06E-05 |
| <i>GPC3</i>         | Down | 0.48 | 6.36E-07 | 1.06E-05 |
| <i>AKR1C3</i>       | Up   | 2.31 | 6.41E-07 | 1.07E-05 |
| <i>PGC</i>          | Down | 0.32 | 6.43E-07 | 1.07E-05 |
| <i>MSH4</i>         | Up   | 2.06 | 6.55E-07 | 1.08E-05 |
| <i>C20orf203</i>    | Down | 0.45 | 6.60E-07 | 1.09E-05 |
| <i>SLC39A5</i>      | Down | 0.37 | 6.72E-07 | 1.11E-05 |
| <i>MGAM</i>         | Down | 0.45 | 7.22E-07 | 1.19E-05 |
| <i>SLIT1</i>        | Down | 0.46 | 7.36E-07 | 1.21E-05 |
| <i>PDYN</i>         | Down | 0.10 | 7.40E-07 | 1.21E-05 |
| <i>SCGB3A1</i>      | Up   | 3.13 | 7.63E-07 | 1.24E-05 |
| <i>LECT1</i>        | Down | 0.16 | 7.85E-07 | 1.27E-05 |
| <i>COL25A1</i>      | Down | 0.41 | 7.87E-07 | 1.28E-05 |
| <i>C21orf29</i>     | Down | 0.38 | 8.20E-07 | 1.32E-05 |
| <i>SLC22A16</i>     | Down | 0.39 | 8.30E-07 | 1.34E-05 |
| <i>RHO</i>          | Down | 0.32 | 8.33E-07 | 1.34E-05 |
| <i>C7orf52</i>      | Down | 0.36 | 8.94E-07 | 1.43E-05 |
| <i>GOLGA6L1</i>     | Down | 0.45 | 9.41E-07 | 1.50E-05 |
| <i>RUNDC3A</i>      | Down | 0.50 | 9.53E-07 | 1.51E-05 |
| <i>TMEM233</i>      | Down | 0.43 | 9.80E-07 | 1.54E-05 |
| <i>C9orf53</i>      | Down | 0.36 | 9.84E-07 | 1.55E-05 |
| <i>LGALS7</i>       | Down | 0.49 | 1.00E-06 | 1.57E-05 |
| <i>LOC100132354</i> | Down | 0.26 | 1.01E-06 | 1.57E-05 |
| <i>RGS7BP</i>       | Down | 0.49 | 1.01E-06 | 1.57E-05 |
| <i>CCR3</i>         | Down | 0.46 | 1.03E-06 | 1.60E-05 |
| <i>GOLGA6L6</i>     | Down | 0.47 | 1.05E-06 | 1.63E-05 |
| <i>MAGEA12</i>      | Down | 0.26 | 1.06E-06 | 1.63E-05 |
| <i>ANKRD34B</i>     | Down | 0.38 | 1.07E-06 | 1.65E-05 |
| <i>C3orf55</i>      | Down | 0.28 | 1.09E-06 | 1.68E-05 |
| <i>PAPPA2</i>       | Down | 0.38 | 1.13E-06 | 1.73E-05 |
| <i>CRIP3</i>        | Down | 0.50 | 1.17E-06 | 1.78E-05 |
| <i>ODZ3</i>         | Down | 0.45 | 1.19E-06 | 1.80E-05 |
| <i>ZDHHC22</i>      | Down | 0.32 | 1.20E-06 | 1.82E-05 |
| <i>MCOLN3</i>       | Down | 0.50 | 1.21E-06 | 1.83E-05 |
| <i>NPFFR1</i>       | Down | 0.39 | 1.21E-06 | 1.83E-05 |
| <i>AZGP1</i>        | Down | 0.36 | 1.26E-06 | 1.89E-05 |
| <i>C2orf40</i>      | Down | 0.42 | 1.28E-06 | 1.92E-05 |
| <i>MDGA2</i>        | Down | 0.35 | 1.29E-06 | 1.93E-05 |
| <i>INSRR</i>        | Down | 0.44 | 1.32E-06 | 1.98E-05 |
| <i>GSDMA</i>        | Down | 0.48 | 1.32E-06 | 1.98E-05 |
| <i>SPAG11B</i>      | Down | 0.28 | 1.34E-06 | 2.01E-05 |
| <i>LOC100128076</i> | Down | 0.29 | 1.34E-06 | 2.01E-05 |
| <i>AGT</i>          | Down | 0.47 | 1.35E-06 | 2.01E-05 |
| <i>CR2</i>          | Down | 0.49 | 1.38E-06 | 2.06E-05 |
| <i>FGF19</i>        | Down | 0.33 | 1.39E-06 | 2.07E-05 |

|                   |      |      |          |          |
|-------------------|------|------|----------|----------|
| <i>DPYSL5</i>     | Down | 0.25 | 1.41E-06 | 2.10E-05 |
| <i>CCKBR</i>      | Up   | 2.42 | 1.47E-06 | 2.17E-05 |
| <i>MPPED1</i>     | Down | 0.33 | 1.47E-06 | 2.17E-05 |
| <i>DUSP15</i>     | Down | 0.49 | 1.48E-06 | 2.18E-05 |
| <i>ZNF257</i>     | Down | 0.47 | 1.49E-06 | 2.18E-05 |
| <i>SPINK2</i>     | Down | 0.43 | 1.51E-06 | 2.21E-05 |
| <i>IGF2BP2</i>    | Down | 0.46 | 1.54E-06 | 2.24E-05 |
| <i>SV2B</i>       | Down | 0.48 | 1.54E-06 | 2.24E-05 |
| <i>GPRIN2</i>     | Down | 0.37 | 1.55E-06 | 2.25E-05 |
| <i>DMRTA2</i>     | Up   | 2.19 | 1.63E-06 | 2.36E-05 |
| <i>NCRNA00162</i> | Down | 0.20 | 1.64E-06 | 2.37E-05 |
| <i>PRSS45</i>     | Down | 0.45 | 1.65E-06 | 2.38E-05 |
| <i>MCCD1</i>      | Down | 0.23 | 1.66E-06 | 2.38E-05 |
| <i>FAM83A</i>     | Down | 0.41 | 1.66E-06 | 2.39E-05 |
| <i>PAGE5</i>      | Down | 0.23 | 1.82E-06 | 2.60E-05 |
| <i>TBX4</i>       | Down | 0.43 | 1.83E-06 | 2.60E-05 |
| <i>PROKR2</i>     | Down | 0.14 | 1.86E-06 | 2.65E-05 |
| <i>PTPRZ1</i>     | Down | 0.32 | 1.90E-06 | 2.70E-05 |
| <i>AP3B2</i>      | Down | 0.46 | 1.92E-06 | 2.73E-05 |
| <i>CRYM</i>       | Down | 0.45 | 1.95E-06 | 2.76E-05 |
| <i>LMAN1L</i>     | Up   | 3.70 | 1.99E-06 | 2.81E-05 |
| <i>ZNF385B</i>    | Up   | 2.38 | 2.13E-06 | 2.99E-05 |
| <i>CNGB3</i>      | Down | 0.35 | 2.22E-06 | 3.10E-05 |
| <i>MYO7B</i>      | Down | 0.46 | 2.29E-06 | 3.19E-05 |
| <i>LOC284798</i>  | Down | 0.38 | 2.30E-06 | 3.19E-05 |
| <i>LOC644669</i>  | Down | 0.37 | 2.39E-06 | 3.31E-05 |
| <i>CXCL14</i>     | Down | 0.43 | 2.41E-06 | 3.33E-05 |
| <i>TCERG1L</i>    | Down | 0.38 | 2.47E-06 | 3.39E-05 |
| <i>CNTNAP5</i>    | Down | 0.29 | 2.54E-06 | 3.47E-05 |
| <i>RBPJL</i>      | Down | 0.40 | 2.65E-06 | 3.60E-05 |
| <i>SORCS3</i>     | Down | 0.31 | 2.68E-06 | 3.63E-05 |
| <i>REG3A</i>      | Down | 0.11 | 2.69E-06 | 3.64E-05 |
| <i>CYP2A7</i>     | Down | 0.32 | 2.75E-06 | 3.71E-05 |
| <i>LIPJ</i>       | Down | 0.37 | 2.77E-06 | 3.74E-05 |
| <i>HTR3C</i>      | Down | 0.32 | 2.88E-06 | 3.86E-05 |
| <i>PCDHGB4</i>    | Down | 0.48 | 3.10E-06 | 4.10E-05 |
| <i>KRT76</i>      | Down | 0.12 | 3.18E-06 | 4.21E-05 |
| <i>BTNL9</i>      | Down | 0.49 | 3.41E-06 | 4.47E-05 |
| <i>GNASAS</i>     | Down | 0.30 | 3.48E-06 | 4.55E-05 |
| <i>SSX2</i>       | Down | 0.26 | 3.57E-06 | 4.67E-05 |
| <i>PCDHA11</i>    | Down | 0.36 | 3.59E-06 | 4.69E-05 |
| <i>GH1</i>        | Down | 0.24 | 3.73E-06 | 4.83E-05 |
| <i>REG1A</i>      | Down | 0.32 | 3.82E-06 | 4.95E-05 |
| <i>TMEM212</i>    | Down | 0.46 | 3.94E-06 | 5.07E-05 |
| <i>PIWIL1</i>     | Down | 0.42 | 3.94E-06 | 5.08E-05 |
| <i>ALG1L2</i>     | Down | 0.45 | 4.56E-06 | 5.76E-05 |
| <i>BRDT</i>       | Down | 0.23 | 4.59E-06 | 5.80E-05 |
| <i>ADAMTS20</i>   | Down | 0.31 | 4.72E-06 | 5.94E-05 |
| <i>BMP3</i>       | Down | 0.48 | 4.78E-06 | 6.01E-05 |
| <i>TLL2</i>       | Down | 0.49 | 4.80E-06 | 6.04E-05 |



|                  |      |      |          |          |
|------------------|------|------|----------|----------|
| <i>FLJ45983</i>  | Down | 0.28 | 4.91E-06 | 6.16E-05 |
| <i>PAH</i>       | Down | 0.30 | 4.98E-06 | 6.21E-05 |
| <i>PGPEP1L</i>   | Down | 0.35 | 5.19E-06 | 6.42E-05 |
| <i>CYP1A2</i>    | Down | 0.34 | 5.28E-06 | 6.52E-05 |
| <i>SLC30A10</i>  | Down | 0.41 | 5.36E-06 | 6.61E-05 |
| <i>KLHL1</i>     | Down | 0.19 | 5.37E-06 | 6.61E-05 |
| <i>SLC38A3</i>   | Down | 0.48 | 5.46E-06 | 6.70E-05 |
| <i>CNKSR2</i>    | Down | 0.42 | 5.49E-06 | 6.72E-05 |
| <i>FBN3</i>      | Down | 0.42 | 5.51E-06 | 6.75E-05 |
| <i>EDAR</i>      | Down | 0.47 | 5.56E-06 | 6.79E-05 |
| <i>KLHL34</i>    | Down | 0.38 | 5.68E-06 | 6.92E-05 |
| <i>PRPH</i>      | Up   | 2.09 | 5.76E-06 | 6.99E-05 |
| <i>CSTL1</i>     | Down | 0.38 | 5.81E-06 | 7.04E-05 |
| <i>WIF1</i>      | Down | 0.35 | 5.85E-06 | 7.09E-05 |
| <i>DRD1</i>      | Down | 0.39 | 5.86E-06 | 7.09E-05 |
| <i>NKX2-2</i>    | Up   | 4.88 | 5.87E-06 | 7.09E-05 |
| <i>SLC12A1</i>   | Down | 0.41 | 5.99E-06 | 7.22E-05 |
| <i>IGFN1</i>     | Down | 0.46 | 6.12E-06 | 7.36E-05 |
| <i>MOBP</i>      | Down | 0.45 | 6.14E-06 | 7.39E-05 |
| <i>LHFPL5</i>    | Down | 0.40 | 6.17E-06 | 7.41E-05 |
| <i>SLC36A2</i>   | Down | 0.47 | 6.17E-06 | 7.41E-05 |
| <i>SYN3</i>      | Down | 0.46 | 6.62E-06 | 7.88E-05 |
| <i>SYT6</i>      | Down | 0.47 | 6.72E-06 | 7.96E-05 |
| <i>SAGE1</i>     | Down | 0.23 | 6.82E-06 | 8.07E-05 |
| <i>DHRS9</i>     | Down | 0.47 | 6.87E-06 | 8.12E-05 |
| <i>FAM46D</i>    | Down | 0.42 | 6.99E-06 | 8.23E-05 |
| <i>TPO</i>       | Down | 0.31 | 7.30E-06 | 8.56E-05 |
| <i>LOC389033</i> | Down | 0.42 | 7.44E-06 | 8.70E-05 |
| <i>CXCL17</i>    | Down | 0.45 | 7.49E-06 | 8.75E-05 |
| <i>RGR</i>       | Up   | 3.16 | 7.56E-06 | 8.81E-05 |
| <i>HIST1H3C</i>  | Down | 0.44 | 7.99E-06 | 9.27E-05 |
| <i>TFF3</i>      | Up   | 2.45 | 8.10E-06 | 9.34E-05 |
| <i>TFF1</i>      | Up   | 2.79 | 8.24E-06 | 9.48E-05 |
| <i>KRT72</i>     | Down | 0.22 | 8.29E-06 | 9.52E-05 |
| <i>C3P1</i>      | Down | 0.23 | 8.52E-06 | 9.74E-05 |
| <i>KRTAP4-1</i>  | Down | 0.26 | 8.61E-06 | 9.84E-05 |
| <i>C10orf90</i>  | Down | 0.35 | 8.92E-06 | 1.01E-04 |
| <i>NLRP4</i>     | Down | 0.30 | 9.13E-06 | 1.03E-04 |
| <i>HRNR</i>      | Down | 0.48 | 9.15E-06 | 1.03E-04 |
| <i>PRMT8</i>     | Down | 0.40 | 9.62E-06 | 1.08E-04 |
| <i>LMO3</i>      | Down | 0.37 | 9.75E-06 | 1.09E-04 |
| <i>LINGO3</i>    | Up   | 2.47 | 9.94E-06 | 1.11E-04 |
| <i>LIN28B</i>    | Down | 0.33 | 1.05E-05 | 1.16E-04 |
| <i>ENDOU</i>     | Down | 0.47 | 1.08E-05 | 1.19E-04 |
| <i>H2BFWT</i>    | Down | 0.23 | 1.14E-05 | 1.25E-04 |
| <i>NXF5</i>      | Down | 0.34 | 1.14E-05 | 1.25E-04 |
| <i>UOX</i>       | Down | 0.39 | 1.14E-05 | 1.25E-04 |
| <i>PADI4</i>     | Down | 0.46 | 1.17E-05 | 1.28E-04 |
| <i>SLC17A8</i>   | Down | 0.34 | 1.17E-05 | 1.28E-04 |
| <i>ELAVL3</i>    | Down | 0.49 | 1.20E-05 | 1.30E-04 |

|            |      |      |          |          |
|------------|------|------|----------|----------|
| SCG3       | Down | 0.38 | 1.21E-05 | 1.31E-04 |
| C8B        | Down | 0.36 | 1.27E-05 | 1.37E-04 |
| C20orf197  | Down | 0.50 | 1.28E-05 | 1.38E-04 |
| TUBA3E     | Down | 0.39 | 1.30E-05 | 1.40E-04 |
| GRIN2A     | Down | 0.48 | 1.33E-05 | 1.42E-04 |
| SNORA11    | Down | 0.43 | 1.34E-05 | 1.43E-04 |
| NAPSA      | Down | 0.48 | 1.35E-05 | 1.44E-04 |
| LRTM1      | Down | 0.28 | 1.41E-05 | 1.49E-04 |
| ELFN2      | Down | 0.43 | 1.43E-05 | 1.51E-04 |
| SLC5A12    | Down | 0.42 | 1.46E-05 | 1.53E-04 |
| ZP1        | Down | 0.49 | 1.51E-05 | 1.59E-04 |
| C14orf39   | Down | 0.36 | 1.55E-05 | 1.61E-04 |
| P2RX2      | Down | 0.45 | 1.55E-05 | 1.61E-04 |
| CASR       | Down | 0.41 | 1.56E-05 | 1.62E-04 |
| NKX6-2     | Down | 0.19 | 1.60E-05 | 1.66E-04 |
| CES4       | Up   | 2.32 | 1.67E-05 | 1.72E-04 |
| DBX2       | Down | 0.34 | 1.71E-05 | 1.75E-04 |
| LOC388387  | Down | 0.37 | 1.75E-05 | 1.80E-04 |
| RSPH9      | Down | 0.49 | 1.75E-05 | 1.80E-04 |
| GPR12      | Down | 0.17 | 1.80E-05 | 1.84E-04 |
| ASPG       | Down | 0.46 | 1.82E-05 | 1.86E-04 |
| GFRA4      | Down | 0.18 | 1.83E-05 | 1.86E-04 |
| KRT36      | Down | 0.43 | 1.87E-05 | 1.90E-04 |
| ELOVL3     | Down | 0.50 | 1.89E-05 | 1.92E-04 |
| ZMAT4      | Down | 0.45 | 1.92E-05 | 1.94E-04 |
| TCEAL2     | Up   | 2.38 | 1.93E-05 | 1.94E-04 |
| RFPL4A     | Down | 0.45 | 1.96E-05 | 1.97E-04 |
| CST5       | Down | 0.32 | 1.97E-05 | 1.98E-04 |
| GABRG2     | Down | 0.10 | 1.98E-05 | 1.99E-04 |
| ABCG8      | Down | 0.46 | 2.07E-05 | 2.07E-04 |
| VCY        | Down | 0.28 | 2.14E-05 | 2.12E-04 |
| DAB1       | Down | 0.43 | 2.15E-05 | 2.13E-04 |
| NCRNA00032 | Down | 0.43 | 2.18E-05 | 2.15E-04 |
| FXD2       | Down | 0.43 | 2.20E-05 | 2.17E-04 |
| KRTAP1-5   | Down | 0.43 | 2.26E-05 | 2.22E-04 |
| KLRG2      | Down | 0.48 | 2.29E-05 | 2.25E-04 |
| ZNF676     | Down | 0.46 | 2.36E-05 | 2.29E-04 |
| KRT74      | Down | 0.37 | 2.38E-05 | 2.31E-04 |
| PRDM9      | Down | 0.30 | 2.39E-05 | 2.32E-04 |
| CDH19      | Down | 0.15 | 2.45E-05 | 2.37E-04 |
| GPR142     | Down | 0.30 | 2.47E-05 | 2.38E-04 |
| SCEL       | Down | 0.46 | 2.52E-05 | 2.41E-04 |
| AMTN       | Down | 0.19 | 2.56E-05 | 2.46E-04 |
| UCHL1      | Down | 0.46 | 2.57E-05 | 2.46E-04 |
| ST8SIA2    | Down | 0.50 | 2.57E-05 | 2.46E-04 |
| TEPP       | Down | 0.50 | 2.58E-05 | 2.47E-04 |
| MAGEE2     | Down | 0.36 | 2.60E-05 | 2.49E-04 |
| SEZ6       | Down | 0.49 | 2.68E-05 | 2.54E-04 |
| C4orf7     | Down | 0.35 | 2.70E-05 | 2.56E-04 |
| HAO2       | Down | 0.37 | 2.75E-05 | 2.60E-04 |

|                     |      |      |          |          |
|---------------------|------|------|----------|----------|
| <i>KRT17</i>        | Down | 0.48 | 2.93E-05 | 2.75E-04 |
| <i>PRSS41</i>       | Down | 0.31 | 2.96E-05 | 2.77E-04 |
| <i>PAEP</i>         | Down | 0.39 | 3.02E-05 | 2.82E-04 |
| <i>GJA8</i>         | Down | 0.24 | 3.02E-05 | 2.82E-04 |
| <i>HTR3B</i>        | Down | 0.29 | 3.02E-05 | 2.82E-04 |
| <i>KLK1</i>         | Down | 0.46 | 3.05E-05 | 2.84E-04 |
| <i>TRPM1</i>        | Down | 0.42 | 3.15E-05 | 2.91E-04 |
| <i>C17orf64</i>     | Down | 0.42 | 3.35E-05 | 3.07E-04 |
| <i>C2orf71</i>      | Down | 0.39 | 3.54E-05 | 3.22E-04 |
| <i>CAMKV</i>        | Down | 0.43 | 3.63E-05 | 3.30E-04 |
| <i>CXCL13</i>       | Up   | 2.23 | 3.69E-05 | 3.34E-04 |
| <i>SLC38A8</i>      | Down | 0.42 | 3.69E-05 | 3.34E-04 |
| <i>DSCR10</i>       | Down | 0.22 | 3.69E-05 | 3.34E-04 |
| <i>KC6</i>          | Down | 0.21 | 3.77E-05 | 3.40E-04 |
| <i>NCAN</i>         | Down | 0.41 | 3.80E-05 | 3.42E-04 |
| <i>C9orf4</i>       | Down | 0.45 | 3.90E-05 | 3.50E-04 |
| <i>XKR7</i>         | Down | 0.27 | 3.93E-05 | 3.52E-04 |
| <i>NCRNA00158</i>   | Up   | 2.26 | 4.02E-05 | 3.60E-04 |
| <i>ANGPTL7</i>      | Down | 0.47 | 4.07E-05 | 3.64E-04 |
| <i>GAP43</i>        | Down | 0.50 | 4.10E-05 | 3.66E-04 |
| <i>FOXE1</i>        | Down | 0.30 | 4.12E-05 | 3.67E-04 |
| <i>HOXB13</i>       | Up   | 2.06 | 4.16E-05 | 3.69E-04 |
| <i>BARX2</i>        | Down | 0.48 | 4.22E-05 | 3.74E-04 |
| <i>LOC100131726</i> | Down | 0.44 | 4.28E-05 | 3.78E-04 |
| <i>FAM180B</i>      | Down | 0.46 | 4.28E-05 | 3.78E-04 |
| <i>FAM71E2</i>      | Down | 0.37 | 4.29E-05 | 3.79E-04 |
| <i>CNTNAP4</i>      | Down | 0.32 | 4.31E-05 | 3.80E-04 |
| <i>KRT83</i>        | Down | 0.47 | 4.81E-05 | 4.20E-04 |
| <i>ST8SIA3</i>      | Down | 0.15 | 4.98E-05 | 4.32E-04 |
| <i>SERPINA12</i>    | Down | 0.28 | 5.11E-05 | 4.41E-04 |
| <i>SNAR-G1</i>      | Down | 0.30 | 5.21E-05 | 4.49E-04 |
| <i>KRT34</i>        | Down | 0.38 | 5.44E-05 | 4.68E-04 |
| <i>KRTAP11-1</i>    | Down | 0.22 | 5.65E-05 | 4.83E-04 |
| <i>MYBPHL</i>       | Down | 0.47 | 5.78E-05 | 4.93E-04 |
| <i>FAM154A</i>      | Down | 0.48 | 6.16E-05 | 5.22E-04 |
| <i>LOC285954</i>    | Down | 0.48 | 6.20E-05 | 5.24E-04 |
| <i>OXT</i>          | Down | 0.36 | 6.24E-05 | 5.27E-04 |
| <i>C3orf30</i>      | Down | 0.39 | 6.43E-05 | 5.40E-04 |
| <i>TNNT1</i>        | Down | 0.43 | 6.55E-05 | 5.49E-04 |
| <i>GABRG1</i>       | Down | 0.26 | 6.57E-05 | 5.50E-04 |
| <i>BET3L</i>        | Up   | 2.67 | 6.63E-05 | 5.54E-04 |
| <i>INSC</i>         | Up   | 2.01 | 6.65E-05 | 5.55E-04 |
| <i>GNG13</i>        | Down | 0.39 | 6.79E-05 | 5.64E-04 |
| <i>SLC12A3</i>      | Down | 0.49 | 6.81E-05 | 5.65E-04 |
| <i>CDK5R2</i>       | Down | 0.44 | 6.82E-05 | 5.66E-04 |
| <i>GJC3</i>         | Down | 0.48 | 7.17E-05 | 5.92E-04 |
| <i>SLC14A1</i>      | Down | 0.48 | 7.33E-05 | 6.03E-04 |
| <i>PTPN20B</i>      | Down | 0.46 | 7.42E-05 | 6.11E-04 |
| <i>OR2T8</i>        | Down | 0.36 | 7.75E-05 | 6.32E-04 |
| <i>SPAG11A</i>      | Down | 0.33 | 7.81E-05 | 6.36E-04 |

|                     |      |      |          |          |
|---------------------|------|------|----------|----------|
| <i>C10orf53</i>     | Down | 0.36 | 7.81E-05 | 6.36E-04 |
| <i>ITLN2</i>        | Down | 0.40 | 8.03E-05 | 6.50E-04 |
| <i>RXFP4</i>        | Up   | 2.19 | 8.12E-05 | 6.56E-04 |
| <i>AACSL</i>        | Down | 0.36 | 8.19E-05 | 6.61E-04 |
| <i>PSG1</i>         | Down | 0.33 | 8.71E-05 | 6.97E-04 |
| <i>NDST4</i>        | Up   | 3.07 | 8.72E-05 | 6.97E-04 |
| <i>SBK2</i>         | Down | 0.41 | 9.36E-05 | 7.39E-04 |
| <i>POU3F2</i>       | Down | 0.33 | 9.51E-05 | 7.49E-04 |
| <i>SSX1</i>         | Down | 0.29 | 9.62E-05 | 7.56E-04 |
| <i>FXYD4</i>        | Down | 0.43 | 9.65E-05 | 7.58E-04 |
| <i>SLC24A2</i>      | Down | 0.40 | 1.03E-04 | 8.08E-04 |
| <i>GRID2</i>        | Down | 0.36 | 1.06E-04 | 8.28E-04 |
| <i>NCRNA00051</i>   | Down | 0.26 | 1.08E-04 | 8.39E-04 |
| <i>HS3ST5</i>       | Down | 0.45 | 1.10E-04 | 8.53E-04 |
| <i>RMST</i>         | Down | 0.37 | 1.10E-04 | 8.53E-04 |
| <i>CRISP3</i>       | Down | 0.43 | 1.11E-04 | 8.57E-04 |
| <i>ARHGDIG</i>      | Up   | 2.27 | 1.16E-04 | 8.88E-04 |
| <i>GPC5</i>         | Down | 0.46 | 1.16E-04 | 8.93E-04 |
| <i>LOC100133545</i> | Down | 0.46 | 1.17E-04 | 8.97E-04 |
| <i>CPN2</i>         | Down | 0.32 | 1.18E-04 | 9.06E-04 |
| <i>RETN</i>         | Down | 0.48 | 1.23E-04 | 9.36E-04 |
| <i>GPX5</i>         | Down | 0.28 | 1.24E-04 | 9.45E-04 |
| <i>SP7</i>          | Down | 0.37 | 1.26E-04 | 9.54E-04 |
| <i>LOC151658</i>    | Down | 0.37 | 1.27E-04 | 9.60E-04 |
| <i>MYH7</i>         | Down | 0.47 | 1.29E-04 | 9.73E-04 |
| <i>UCMA</i>         | Down | 0.29 | 1.33E-04 | 1.01E-03 |
| <i>SSX7</i>         | Down | 0.24 | 1.36E-04 | 1.02E-03 |
| <i>SERPINA11</i>    | Down | 0.34 | 1.39E-04 | 1.04E-03 |
| <i>TAS2R38</i>      | Down | 0.29 | 1.41E-04 | 1.06E-03 |
| <i>RAX</i>          | Down | 0.27 | 1.49E-04 | 1.11E-03 |
| <i>PEX5L</i>        | Down | 0.48 | 1.49E-04 | 1.11E-03 |
| <i>CHST9</i>        | Down | 0.48 | 1.53E-04 | 1.13E-03 |
| <i>MYH2</i>         | Down | 0.41 | 1.57E-04 | 1.16E-03 |
| <i>FOXD3</i>        | Down | 0.26 | 1.62E-04 | 1.19E-03 |
| <i>RBP2</i>         | Down | 0.36 | 1.65E-04 | 1.21E-03 |
| <i>PIRT</i>         | Down | 0.46 | 1.67E-04 | 1.22E-03 |
| <i>RTP2</i>         | Down | 0.38 | 1.69E-04 | 1.23E-03 |
| <i>TAS2R43</i>      | Down | 0.48 | 1.72E-04 | 1.25E-03 |
| <i>WDR16</i>        | Down | 0.50 | 1.73E-04 | 1.26E-03 |
| <i>MYL10</i>        | Down | 0.35 | 1.74E-04 | 1.26E-03 |
| <i>GRK1</i>         | Down | 0.31 | 1.76E-04 | 1.28E-03 |
| <i>C13orf26</i>     | Down | 0.23 | 1.78E-04 | 1.29E-03 |
| <i>SSX8</i>         | Down | 0.30 | 1.85E-04 | 1.32E-03 |
| <i>FLJ34503</i>     | Down | 0.46 | 1.94E-04 | 1.38E-03 |
| <i>PSG4</i>         | Down | 0.40 | 1.95E-04 | 1.39E-03 |
| <i>ZNF536</i>       | Down | 0.50 | 1.97E-04 | 1.40E-03 |
| <i>NHLH2</i>        | Down | 0.36 | 2.00E-04 | 1.41E-03 |
| <i>KCNC2</i>        | Down | 0.34 | 2.00E-04 | 1.41E-03 |
| <i>PPYR1</i>        | Down | 0.46 | 2.06E-04 | 1.45E-03 |
| <i>GPR50</i>        | Down | 0.29 | 2.10E-04 | 1.47E-03 |

|                     |      |      |          |          |
|---------------------|------|------|----------|----------|
| <i>IGFBP1</i>       | Down | 0.40 | 2.19E-04 | 1.52E-03 |
| <i>HOXC8</i>        | Up   | 2.42 | 2.23E-04 | 1.55E-03 |
| <i>CRHR2</i>        | Down | 0.40 | 2.24E-04 | 1.55E-03 |
| <i>CALY</i>         | Down | 0.45 | 2.25E-04 | 1.56E-03 |
| <i>LOC100133893</i> | Down | 0.45 | 2.28E-04 | 1.57E-03 |
| <i>GRM3</i>         | Down | 0.48 | 2.30E-04 | 1.58E-03 |
| <i>TMEM229A</i>     | Down | 0.35 | 2.45E-04 | 1.67E-03 |
| <i>PRSS1</i>        | Down | 0.49 | 2.45E-04 | 1.67E-03 |
| <i>EN1</i>          | Down | 0.33 | 2.56E-04 | 1.73E-03 |
| <i>LOC729668</i>    | Down | 0.45 | 2.63E-04 | 1.77E-03 |
| <i>BSX</i>          | Down | 0.18 | 2.68E-04 | 1.80E-03 |
| <i>VSX2</i>         | Down | 0.32 | 2.72E-04 | 1.83E-03 |
| <i>SFRP2</i>        | Up   | 2.01 | 2.76E-04 | 1.85E-03 |
| <i>HTR3D</i>        | Down | 0.41 | 2.80E-04 | 1.87E-03 |
| <i>MAFA</i>         | Down | 0.40 | 2.94E-04 | 1.94E-03 |
| <i>CA4</i>          | Down | 0.49 | 2.94E-04 | 1.95E-03 |
| <i>KRTAP2-2</i>     | Down | 0.38 | 3.02E-04 | 1.99E-03 |
| <i>KRT4</i>         | Down | 0.43 | 3.03E-04 | 1.99E-03 |
| <i>COL19A1</i>      | Down | 0.50 | 3.08E-04 | 2.02E-03 |
| <i>KRT33B</i>       | Down | 0.29 | 3.09E-04 | 2.02E-03 |
| <i>DMBT1</i>        | Down | 0.47 | 3.12E-04 | 2.04E-03 |
| <i>ACMSD</i>        | Down | 0.35 | 3.13E-04 | 2.05E-03 |
| <i>OR1N1</i>        | Down | 0.25 | 3.16E-04 | 2.06E-03 |
| <i>SMPX</i>         | Down | 0.38 | 3.28E-04 | 2.13E-03 |
| <i>SYT9</i>         | Down | 0.47 | 3.28E-04 | 2.13E-03 |
| <i>LOC100192426</i> | Down | 0.43 | 3.51E-04 | 2.26E-03 |
| <i>VSIG2</i>        | Down | 0.50 | 3.56E-04 | 2.28E-03 |
| <i>KLK2</i>         | Down | 0.49 | 3.57E-04 | 2.29E-03 |
| <i>AGXT2</i>        | Down | 0.33 | 3.58E-04 | 2.29E-03 |
| <i>CRNN</i>         | Down | 0.39 | 3.65E-04 | 2.33E-03 |
| <i>C11orf87</i>     | Down | 0.46 | 3.66E-04 | 2.34E-03 |
| <i>OR2H2</i>        | Down | 0.41 | 3.70E-04 | 2.36E-03 |
| <i>ABCC12</i>       | Down | 0.40 | 3.76E-04 | 2.39E-03 |
| <i>MMP20</i>        | Down | 0.35 | 3.76E-04 | 2.39E-03 |
| <i>CFHR5</i>        | Down | 0.17 | 3.76E-04 | 2.39E-03 |
| <i>HS3ST6</i>       | Down | 0.47 | 3.78E-04 | 2.40E-03 |
| <i>DSC1</i>         | Down | 0.50 | 3.87E-04 | 2.45E-03 |
| <i>MGC45800</i>     | Down | 0.47 | 3.98E-04 | 2.51E-03 |
| <i>FOXC2</i>        | Up   | 2.00 | 3.99E-04 | 2.51E-03 |
| <i>KCNV1</i>        | Down | 0.29 | 4.10E-04 | 2.57E-03 |
| <i>HIST1H1T</i>     | Down | 0.47 | 4.14E-04 | 2.59E-03 |
| <i>PDX1</i>         | Up   | 2.64 | 4.16E-04 | 2.61E-03 |
| <i>TRIM63</i>       | Down | 0.49 | 4.20E-04 | 2.62E-03 |
| <i>PLD5</i>         | Up   | 2.32 | 4.34E-04 | 2.70E-03 |
| <i>ANXA13</i>       | Down | 0.49 | 4.46E-04 | 2.76E-03 |
| <i>LOC340508</i>    | Down | 0.46 | 4.50E-04 | 2.78E-03 |
| <i>MTNR1A</i>       | Down | 0.41 | 4.53E-04 | 2.79E-03 |
| <i>C1orf180</i>     | Down | 0.44 | 4.58E-04 | 2.82E-03 |
| <i>ACTL6B</i>       | Down | 0.33 | 4.66E-04 | 2.85E-03 |
| <i>VSNL1</i>        | Down | 0.50 | 4.89E-04 | 2.97E-03 |

|                   |      |      |          |          |
|-------------------|------|------|----------|----------|
| <i>PGA5</i>       | Down | 0.46 | 5.07E-04 | 3.06E-03 |
| <i>HTR4</i>       | Down | 0.33 | 5.09E-04 | 3.07E-03 |
| <i>LY6G6F</i>     | Down | 0.46 | 5.16E-04 | 3.11E-03 |
| <i>ZNF679</i>     | Down | 0.29 | 5.17E-04 | 3.11E-03 |
| <i>OR2T33</i>     | Down | 0.34 | 5.21E-04 | 3.13E-03 |
| <i>NXPH2</i>      | Down | 0.39 | 5.37E-04 | 3.21E-03 |
| <i>TCL1B</i>      | Down | 0.47 | 5.52E-04 | 3.29E-03 |
| <i>HOXC13</i>     | Up   | 2.96 | 5.58E-04 | 3.31E-03 |
| <i>ARHGAP36</i>   | Down | 0.47 | 5.68E-04 | 3.37E-03 |
| <i>FOXI2</i>      | Down | 0.43 | 5.86E-04 | 3.45E-03 |
| <i>PENK</i>       | Down | 0.37 | 6.05E-04 | 3.54E-03 |
| <i>KRTAP9-8</i>   | Down | 0.26 | 6.07E-04 | 3.55E-03 |
| <i>PGLYRP4</i>    | Down | 0.48 | 6.47E-04 | 3.75E-03 |
| <i>CDX2</i>       | Down | 0.41 | 6.65E-04 | 3.84E-03 |
| <i>C17orf55</i>   | Up   | 2.07 | 6.97E-04 | 3.99E-03 |
| <i>TUBA3C</i>     | Down | 0.47 | 7.13E-04 | 4.06E-03 |
| <i>REG3G</i>      | Down | 0.15 | 7.35E-04 | 4.17E-03 |
| <i>KRTAP2-1</i>   | Down | 0.36 | 7.60E-04 | 4.28E-03 |
| <i>CER1</i>       | Down | 0.44 | 7.73E-04 | 4.35E-03 |
| <i>GPR128</i>     | Down | 0.33 | 7.77E-04 | 4.37E-03 |
| <i>C21orf90</i>   | Down | 0.45 | 8.25E-04 | 4.59E-03 |
| <i>COL20A1</i>    | Down | 0.42 | 8.27E-04 | 4.60E-03 |
| <i>VWC2</i>       | Down | 0.50 | 8.51E-04 | 4.71E-03 |
| <i>KRTAP4-12</i>  | Down | 0.22 | 8.52E-04 | 4.71E-03 |
| <i>RIPPLY1</i>    | Down | 0.48 | 8.55E-04 | 4.72E-03 |
| <i>AFP</i>        | Down | 0.44 | 8.86E-04 | 4.85E-03 |
| <i>IL17A</i>      | Up   | 3.44 | 8.98E-04 | 4.91E-03 |
| <i>C1orf87</i>    | Down | 0.41 | 9.11E-04 | 4.97E-03 |
| <i>CLC</i>        | Down | 0.33 | 9.43E-04 | 5.13E-03 |
| <i>S100A7</i>     | Up   | 2.49 | 9.65E-04 | 5.22E-03 |
| <i>NCRNA00113</i> | Down | 0.41 | 9.66E-04 | 5.23E-03 |
| <i>POU3F3</i>     | Down | 0.29 | 1.01E-03 | 5.42E-03 |
| <i>SCGB1C1</i>    | Down | 0.37 | 1.01E-03 | 5.44E-03 |
| <i>LOC150185</i>  | Down | 0.44 | 1.03E-03 | 5.54E-03 |
| <i>SLC34A1</i>    | Down | 0.38 | 1.05E-03 | 5.63E-03 |
| <i>SYNPR</i>      | Down | 0.33 | 1.08E-03 | 5.75E-03 |
| <i>LOC153910</i>  | Down | 0.39 | 1.10E-03 | 5.84E-03 |
| <i>FFAR1</i>      | Down | 0.31 | 1.13E-03 | 5.98E-03 |
| <i>FLG2</i>       | Down | 0.39 | 1.17E-03 | 6.11E-03 |
| <i>IL29</i>       | Down | 0.48 | 1.18E-03 | 6.17E-03 |
| <i>CTSG</i>       | Down | 0.50 | 1.22E-03 | 6.37E-03 |
| <i>DEFB109P1B</i> | Down | 0.48 | 1.23E-03 | 6.40E-03 |
| <i>TKTL2</i>      | Down | 0.49 | 1.26E-03 | 6.51E-03 |
| <i>PPY</i>        | Down | 0.29 | 1.29E-03 | 6.64E-03 |
| <i>LYZL2</i>      | Down | 0.44 | 1.32E-03 | 6.76E-03 |
| <i>BTNL2</i>      | Down | 0.45 | 1.33E-03 | 6.80E-03 |
| <i>TMPRSS15</i>   | Down | 0.39 | 1.35E-03 | 6.89E-03 |
| <i>LY6G6D</i>     | Down | 0.41 | 1.37E-03 | 6.95E-03 |
| <i>QRFPR</i>      | Down | 0.44 | 1.46E-03 | 7.35E-03 |
| <i>PANX3</i>      | Down | 0.38 | 1.47E-03 | 7.36E-03 |

|                  |      |      |          |          |
|------------------|------|------|----------|----------|
| <i>PWRN1</i>     | Down | 0.38 | 1.49E-03 | 7.44E-03 |
| <i>CLEC4M</i>    | Down | 0.45 | 1.49E-03 | 7.46E-03 |
| <i>FGF4</i>      | Down | 0.26 | 1.50E-03 | 7.50E-03 |
| <i>SLC2A2</i>    | Down | 0.15 | 1.51E-03 | 7.53E-03 |
| <i>POTEG</i>     | Down | 0.44 | 1.53E-03 | 7.63E-03 |
| <i>FSTL5</i>     | Down | 0.46 | 1.55E-03 | 7.69E-03 |
| <i>CARTPT</i>    | Down | 0.35 | 1.56E-03 | 7.74E-03 |
| <i>KRT24</i>     | Up   | 2.41 | 1.57E-03 | 7.77E-03 |
| <i>CARD18</i>    | Down | 0.22 | 1.57E-03 | 7.79E-03 |
| <i>OR7E5P</i>    | Down | 0.37 | 1.61E-03 | 7.94E-03 |
| <i>CACNG1</i>    | Down | 0.47 | 1.61E-03 | 7.95E-03 |
| <i>PSAPL1</i>    | Down | 0.29 | 1.63E-03 | 8.04E-03 |
| <i>GDPD4</i>     | Down | 0.48 | 1.66E-03 | 8.16E-03 |
| <i>CHP2</i>      | Down | 0.47 | 1.67E-03 | 8.17E-03 |
| <i>UGT1A10</i>   | Down | 0.25 | 1.67E-03 | 8.20E-03 |
| <i>IL1F9</i>     | Down | 0.48 | 1.71E-03 | 8.33E-03 |
| <i>CYP3A7</i>    | Down | 0.46 | 1.72E-03 | 8.38E-03 |
| <i>GATA5</i>     | Down | 0.44 | 1.78E-03 | 8.60E-03 |
| <i>KCNB2</i>     | Down | 0.49 | 1.82E-03 | 8.77E-03 |
| <i>SLC22A12</i>  | Down | 0.28 | 1.93E-03 | 9.20E-03 |
| <i>CACNG8</i>    | Down | 0.35 | 1.94E-03 | 9.25E-03 |
| <i>SCGB3A2</i>   | Down | 0.40 | 1.97E-03 | 9.37E-03 |
| <i>KRTAP2-4</i>  | Down | 0.38 | 1.99E-03 | 9.45E-03 |
| <i>ARPP21</i>    | Down | 0.41 | 2.06E-03 | 9.73E-03 |
| <i>CTAG2</i>     | Down | 0.28 | 2.15E-03 | 0.01     |
| <i>SERPINA10</i> | Down | 0.44 | 2.17E-03 | 0.01     |
| <i>OTOP1</i>     | Down | 0.38 | 2.21E-03 | 0.01     |
| <i>XAGE3</i>     | Down | 0.37 | 2.26E-03 | 0.01     |
| <i>VPREB1</i>    | Down | 0.18 | 2.37E-03 | 0.01     |
| <i>TMEM196</i>   | Down | 0.43 | 2.38E-03 | 0.01     |
| <i>LOC388428</i> | Down | 0.45 | 2.42E-03 | 0.01     |
| <i>LBP</i>       | Down | 0.47 | 2.60E-03 | 0.01     |
| <i>HULC</i>      | Down | 0.50 | 2.62E-03 | 0.01     |
| <i>NTSR2</i>     | Down | 0.40 | 2.75E-03 | 0.01     |
| <i>C15orf2</i>   | Down | 0.49 | 2.76E-03 | 0.01     |
| <i>HILS1</i>     | Down | 0.38 | 2.77E-03 | 0.01     |
| <i>SOX1</i>      | Down | 0.30 | 2.81E-03 | 0.01     |
| <i>WISP3</i>     | Down | 0.49 | 2.87E-03 | 0.01     |
| <i>HMP19</i>     | Down | 0.49 | 2.87E-03 | 0.01     |
| <i>ASCL4</i>     | Down | 0.38 | 2.88E-03 | 0.01     |
| <i>LHX8</i>      | Down | 0.27 | 2.88E-03 | 0.01     |
| <i>C9</i>        | Down | 0.32 | 2.93E-03 | 0.01     |
| <i>GABRA2</i>    | Down | 0.46 | 2.94E-03 | 0.01     |
| <i>OPN5</i>      | Down | 0.38 | 2.94E-03 | 0.01     |
| <i>BSND</i>      | Down | 0.46 | 2.99E-03 | 0.01     |
| <i>CIDEA</i>     | Down | 0.44 | 3.12E-03 | 0.01     |
| <i>KRT12</i>     | Down | 0.48 | 3.15E-03 | 0.01     |
| <i>EVX1</i>      | Down | 0.35 | 3.21E-03 | 0.01     |
| <i>VSTM2B</i>    | Down | 0.31 | 3.30E-03 | 0.01     |
| <i>PSG5</i>      | Down | 0.43 | 3.43E-03 | 0.01     |

|           |      |      |          |      |
|-----------|------|------|----------|------|
| ZG16      | Down | 0.40 | 3.53E-03 | 0.02 |
| TLX1NB    | Up   | 2.91 | 3.61E-03 | 0.02 |
| NOTO      | Up   | 2.83 | 3.63E-03 | 0.02 |
| NPY5R     | Down | 0.42 | 3.70E-03 | 0.02 |
| OPRM1     | Down | 0.45 | 3.75E-03 | 0.02 |
| NROB2     | Down | 0.49 | 4.05E-03 | 0.02 |
| MOG       | Down | 0.49 | 4.13E-03 | 0.02 |
| POTEH     | Down | 0.49 | 4.20E-03 | 0.02 |
| PRODH2    | Down | 0.39 | 4.25E-03 | 0.02 |
| LOC148824 | Down | 0.45 | 4.42E-03 | 0.02 |
| PRR21     | Down | 0.38 | 4.44E-03 | 0.02 |
| LOC400940 | Down | 0.35 | 4.47E-03 | 0.02 |
| KRT73     | Down | 0.35 | 4.48E-03 | 0.02 |
| MUC7      | Down | 0.37 | 4.63E-03 | 0.02 |
| LOC440040 | Down | 0.48 | 4.63E-03 | 0.02 |
| PCA3      | Down | 0.46 | 4.85E-03 | 0.02 |
| NPBWR1    | Down | 0.42 | 5.20E-03 | 0.02 |
| OR2T12    | Down | 0.36 | 5.20E-03 | 0.02 |
| GAST      | Up   | 2.11 | 5.39E-03 | 0.02 |
| NR1H4     | Down | 0.31 | 5.51E-03 | 0.02 |
| GH2       | Down | 0.26 | 5.62E-03 | 0.02 |
| C16orf82  | Down | 0.36 | 5.64E-03 | 0.02 |
| MMP27     | Down | 0.34 | 5.77E-03 | 0.02 |
| SLC6A19   | Down | 0.33 | 5.81E-03 | 0.02 |
| SALL3     | Down | 0.35 | 5.87E-03 | 0.02 |
| FOXB1     | Down | 0.50 | 5.92E-03 | 0.02 |
| KRTAP9-4  | Down | 0.42 | 6.07E-03 | 0.02 |
| SLITRK2   | Down | 0.46 | 6.23E-03 | 0.02 |
| C6orf146  | Down | 0.45 | 6.33E-03 | 0.02 |
| PLP1      | Down | 0.49 | 6.42E-03 | 0.02 |
| GPR151    | Down | 0.41 | 6.55E-03 | 0.02 |
| SUN3      | Down | 0.48 | 6.55E-03 | 0.02 |
| TACR3     | Down | 0.40 | 6.60E-03 | 0.02 |
| HORMAD1   | Down | 0.49 | 6.90E-03 | 0.03 |
| LGALS14   | Down | 0.41 | 7.02E-03 | 0.03 |
| PRKAG3    | Down | 0.44 | 7.03E-03 | 0.03 |
| XIRP2     | Down | 0.49 | 7.22E-03 | 0.03 |
| KRT35     | Down | 0.43 | 7.23E-03 | 0.03 |
| ADH7      | Up   | 2.12 | 7.35E-03 | 0.03 |
| ALX4      | Down | 0.46 | 7.35E-03 | 0.03 |
| CPN1      | Up   | 2.05 | 7.51E-03 | 0.03 |
| FRMPD4    | Down | 0.41 | 7.60E-03 | 0.03 |
| RTP3      | Down | 0.37 | 7.78E-03 | 0.03 |
| BARHL2    | Down | 0.33 | 7.91E-03 | 0.03 |
| KRTAP3-2  | Down | 0.35 | 8.18E-03 | 0.03 |
| CSAG1     | Down | 0.47 | 8.29E-03 | 0.03 |
| OPN1LW    | Down | 0.40 | 8.31E-03 | 0.03 |
| CRCT1     | Down | 0.35 | 8.65E-03 | 0.03 |
| FAM123A   | Down | 0.48 | 8.75E-03 | 0.03 |
| SOX21     | Down | 0.43 | 8.79E-03 | 0.03 |



|                  |      |      |          |      |
|------------------|------|------|----------|------|
| <i>SIM1</i>      | Down | 0.46 | 8.83E-03 | 0.03 |
| <i>PMCHL2</i>    | Down | 0.36 | 9.44E-03 | 0.03 |
| <i>TRIML2</i>    | Down | 0.50 | 9.75E-03 | 0.03 |
| <i>MYL7</i>      | Down | 0.48 | 9.97E-03 | 0.03 |
| <i>KRTAP10-2</i> | Down | 0.42 | 0.01     | 0.03 |
| <i>GBX1</i>      | Down | 0.45 | 0.01     | 0.04 |
| <i>OR3A2</i>     | Down | 0.41 | 0.01     | 0.04 |
| <i>SPATA22</i>   | Down | 0.45 | 0.01     | 0.04 |
| <i>IFNB1</i>     | Down | 0.49 | 0.01     | 0.04 |
| <i>ZIC3</i>      | Down | 0.26 | 0.01     | 0.04 |
| <i>OLFM3</i>     | Down | 0.50 | 0.01     | 0.04 |
| <i>TSPAN19</i>   | Down | 0.47 | 0.01     | 0.04 |
| <i>CSH1</i>      | Down | 0.36 | 0.01     | 0.04 |
| <i>PCDH8</i>     | Down | 0.48 | 0.01     | 0.04 |
| <i>CRH</i>       | Down | 0.25 | 0.01     | 0.04 |
| <i>MYT1L</i>     | Down | 0.46 | 0.01     | 0.04 |
| <i>GIF</i>       | Down | 0.45 | 0.01     | 0.05 |
| <i>CIB4</i>      | Down | 0.44 | 0.01     | 0.05 |
| <i>RAG2</i>      | Down | 0.46 | 0.01     | 0.05 |
| <i>IAPP</i>      | Down | 0.48 | 0.02     | 0.05 |
| <i>OR51B5</i>    | Down | 0.40 | 0.02     | 0.05 |

---
