# Supplementary material for: Endometrial cancer risk and survival by tumor MMR status
Source: PubMed Central journal article supplement — J Gynecol Oncol. 2018 Feb 23;29(3):e39. doi: 10.3802/jgo.2018.29.e39 (PMC5920223; doi:10.3802/jgo.2018.29.e39), 2018-02-23
Supplement: jgo-29-e39-s005.pdf [file jgo-29-e39-s005.pdf]

**Supplementary Table 5. Details for 92 genes differentially expressed between germline MMR deficient and assumed somatic MMR deficient endometrioid tumors**

| Gene             | Up/down regulated in somatic MMR deficient tumours | Fold change | p-value  | Adjusted p-value |
|------------------|----------------------------------------------------|-------------|----------|------------------|
| <i>CACNA1S</i>   | Up                                                 | 156266      | 4.45E-24 | 8.01E-20         |
| <i>AMBN</i>      | Up                                                 | 254290      | 1.71E-19 | 1.54E-15         |
| <i>TEX19</i>     | Down                                               | 0.02        | 2.45E-11 | 1.47E-07         |
| <i>UTP20</i>     | Down                                               | 0.15        | 5.93E-11 | 2.67E-07         |
| <i>ZC3H12C</i>   | Up                                                 | 7.52        | 5.96E-10 | 2.15E-06         |
| <i>DEFA5</i>     | Up                                                 | 153154      | 8.24E-10 | 2.47E-06         |
| <i>ZNF385B</i>   | Up                                                 | 59.65       | 1.29E-09 | 3.32E-06         |
| <i>LRRTM1</i>    | Up                                                 | 28.03       | 4.62E-08 | 9.50E-05         |
| <i>PGPEP1L</i>   | Down                                               | 0.02        | 4.75E-08 | 9.50E-05         |
| <i>FSCN3</i>     | Down                                               | 0.21        | 7.54E-08 | 1.36E-04         |
| <i>NOTUM</i>     | Up                                                 | 92.58       | 1.08E-07 | 1.76E-04         |
| <i>MEGF11</i>    | Up                                                 | 25.51       | 1.73E-07 | 2.60E-04         |
| <i>DEFB4A</i>    | Up                                                 | 66.16       | 4.40E-07 | 6.10E-04         |
| <i>MLH1</i>      | Down                                               | 0.24        | 5.61E-07 | 7.21E-04         |
| <i>GPX2</i>      | Up                                                 | 55.34       | 6.84E-07 | 7.85E-04         |
| <i>HAS3</i>      | Up                                                 | 10.52       | 6.98E-07 | 7.85E-04         |
| <i>OBP2B</i>     | Up                                                 | 367.41      | 1.23E-06 | 1.30E-03         |
| <i>PALM3</i>     | Up                                                 | 12.33       | 1.33E-06 | 1.33E-03         |
| <i>ATRNL1</i>    | Up                                                 | 21.05       | 1.90E-06 | 1.66E-03         |
| <i>C1QTNF9B</i>  | Down                                               | 0.09        | 2.02E-06 | 1.66E-03         |
| <i>EPM2AIP1</i>  | Down                                               | 0.21        | 1.98E-06 | 1.66E-03         |
| <i>TSPAN33</i>   | Up                                                 | 3.79        | 1.95E-06 | 1.66E-03         |
| <i>SEMA5B</i>    | Up                                                 | 11.16       | 3.02E-06 | 2.37E-03         |
| <i>LOC441454</i> | Down                                               | 0.16        | 3.55E-06 | 2.56E-03         |
| <i>PDLIM5</i>    | Down                                               | 0.39        | 3.56E-06 | 2.56E-03         |
| <i>CRYBB1</i>    | Up                                                 | 23.17       | 5.65E-06 | 3.92E-03         |
| <i>CYP24A1</i>   | Up                                                 | 20.99       | 8.83E-06 | 5.69E-03         |
| <i>PGBD5</i>     | Up                                                 | 7.26        | 9.23E-06 | 5.73E-03         |
| <i>CLU</i>       | Up                                                 | 10.29       | 1.37E-05 | 7.93E-03         |
| <i>DKK4</i>      | Up                                                 | 284.48      | 1.33E-05 | 7.93E-03         |
| <i>ESRRB</i>     | Down                                               | 0.06        | 1.41E-05 | 7.93E-03         |
| <i>C2CD4A</i>    | Up                                                 | 9.95        | 1.59E-05 | 8.60E-03         |
| <i>NEDD4</i>     | Up                                                 | 3.19        | 1.62E-05 | 8.60E-03         |
| <i>BEX5</i>      | Up                                                 | 14.04       | 1.87E-05 | 9.63E-03         |
| <i>OBP2A</i>     | Up                                                 | 90.24       | 1.93E-05 | 9.66E-03         |
| <i>CES3</i>      | Up                                                 | 8.62        | 2.11E-05 | 0.01             |
| <i>PRKX</i>      | Down                                               | 0.37        | 2.14E-05 | 0.01             |
| <i>LOC723809</i> | Up                                                 | 25.13       | 2.42E-05 | 0.01             |
| <i>RNF128</i>    | Up                                                 | 37.03       | 2.58E-05 | 0.01             |
| <i>C3orf45</i>   | Down                                               | 0.09        | 3.11E-05 | 0.01             |
| <i>ZIC1</i>      | Up                                                 | 22.64       | 3.75E-05 | 0.02             |
| <i>CES1</i>      | Up                                                 | 13.46       | 3.85E-05 | 0.02             |
| <i>GABRG3</i>    | Up                                                 | 56.03       | 4.15E-05 | 0.02             |
| <i>CSF3</i>      | Up                                                 | 18.17       | 4.52E-05 | 0.02             |
| <i>KANK1</i>     | Up                                                 | 2.67        | 4.60E-05 | 0.02             |

|                   |      |       |          |      |
|-------------------|------|-------|----------|------|
| <i>ATP6V0A4</i>   | Up   | 13.92 | 5.51E-05 | 0.02 |
| <i>POMC</i>       | Down | 0.11  | 6.15E-05 | 0.02 |
| <i>TUBA4A</i>     | Up   | 4.72  | 6.07E-05 | 0.02 |
| <i>PRKY</i>       | Down | 0.33  | 6.55E-05 | 0.02 |
| <i>C10orf99</i>   | Up   | 19.20 | 6.74E-05 | 0.02 |
| <i>GRM6</i>       | Down | 0.15  | 7.57E-05 | 0.03 |
| <i>SAA1</i>       | Up   | 13.32 | 7.51E-05 | 0.03 |
| <i>CPLX3</i>      | Up   | 33.59 | 8.39E-05 | 0.03 |
| <i>PDZK1IP1</i>   | Up   | 8.37  | 8.45E-05 | 0.03 |
| <i>CEACAM22P</i>  | Down | 0.33  | 8.82E-05 | 0.03 |
| <i>LGR6</i>       | Up   | 12.73 | 1.02E-04 | 0.03 |
| <i>NCRNA00116</i> | Up   | 9.98  | 1.07E-04 | 0.03 |
| <i>SAA2</i>       | Up   | 12.41 | 1.14E-04 | 0.03 |
| <i>PCOLCE2</i>    | Up   | 13.70 | 1.18E-04 | 0.03 |
| <i>C4BPA</i>      | Up   | 18.48 | 1.21E-04 | 0.04 |
| <i>ACCN1</i>      | Up   | 13.00 | 1.29E-04 | 0.04 |
| <i>C9orf66</i>    | Up   | 8.61  | 1.39E-04 | 0.04 |
| <i>FXD2</i>       | Up   | 10.66 | 1.27E-04 | 0.04 |
| <i>HIVEP3</i>     | Up   | 2.98  | 1.34E-04 | 0.04 |
| <i>PI3</i>        | Up   | 14.23 | 1.37E-04 | 0.04 |
| <i>PRR19</i>      | Down | 0.42  | 1.32E-04 | 0.04 |
| <i>TFAP2B</i>     | Up   | 29.26 | 1.36E-04 | 0.04 |
| <i>TNNT2</i>      | Up   | 10.75 | 1.29E-04 | 0.04 |
| <i>BCL11A</i>     | Up   | 4.55  | 1.46E-04 | 0.04 |
| <i>C6orf126</i>   | Up   | 22.08 | 1.72E-04 | 0.04 |
| <i>CHI3L2</i>     | Up   | 9.99  | 1.65E-04 | 0.04 |
| <i>COL9A1</i>     | Up   | 17.65 | 1.56E-04 | 0.04 |
| <i>CX3CL1</i>     | Up   | 4.32  | 1.71E-04 | 0.04 |
| <i>CYP2A6</i>     | Down | 0.05  | 1.51E-04 | 0.04 |
| <i>FAM155A</i>    | Up   | 7.57  | 1.54E-04 | 0.04 |
| <i>GBP3</i>       | Up   | 3.49  | 1.65E-04 | 0.04 |
| <i>LRRC55</i>     | Up   | 11.80 | 1.71E-04 | 0.04 |
| <i>PDZK1</i>      | Up   | 10.16 | 1.52E-04 | 0.04 |
| <i>THSD7B</i>     | Down | 0.13  | 1.70E-04 | 0.04 |
| <i>TMEM213</i>    | Up   | 11.95 | 1.65E-04 | 0.04 |
| <i>TMEM72</i>     | Up   | 17.15 | 1.53E-04 | 0.04 |
| <i>COL6A1</i>     | Down | 0.28  | 1.75E-04 | 0.04 |
| <i>GPA33</i>      | Up   | 12.57 | 1.87E-04 | 0.04 |
| <i>ZIC4</i>       | Up   | 20.16 | 1.89E-04 | 0.04 |
| <i>CYP3A5</i>     | Up   | 10.32 | 1.97E-04 | 0.04 |
| <i>PITX2</i>      | Up   | 13.55 | 2.16E-04 | 0.04 |
| <i>IQCA1</i>      | Down | 0.12  | 2.34E-04 | 0.05 |
| <i>B3GNT8</i>     | Up   | 4.69  | 2.45E-04 | 0.05 |
| <i>KIF26B</i>     | Up   | 3.70  | 2.55E-04 | 0.05 |
| <i>PAPSS1</i>     | Down | 0.46  | 2.51E-04 | 0.05 |
| <i>SSFA2</i>      | Down | 0.39  | 2.53E-04 | 0.05 |
| <i>PECR</i>       | Up   | 2.30  | 2.59E-04 | 0.05 |

---
