# Supplementary material for: Endometrial cancer risk and survival by tumor MMR status
Source: PubMed Central journal article supplement — J Gynecol Oncol. 2018 Feb 23;29(3):e39. doi: 10.3802/jgo.2018.29.e39 (PMC5920223; doi:10.3802/jgo.2018.29.e39), 2018-02-23
Supplement: jgo-29-e39-s006.pdf [file jgo-29-e39-s006.pdf]

**Supplementary Table 6. Significantly enriched disease classes using 92 gene list differentially expressed between germline MMR deficient and assumed somatic MMR deficient endometrioid tumors**

| Category                        | Term                    | Fold enrichment    | p-value                | Benjamini | Genes                                                                                                                                                                                                                                                                                                                                    |
|---------------------------------|-------------------------|--------------------|------------------------|-----------|------------------------------------------------------------------------------------------------------------------------------------------------------------------------------------------------------------------------------------------------------------------------------------------------------------------------------------------|
| <b><i>GAD_DISEASE_CLASS</i></b> | <b><i>METABOLIC</i></b> | <b><i>1.51</i></b> | <b><i>7.82E-04</i></b> | 0.01      | <b><i>CSF3, CYP24A1, CYP3A5, PDLIM5, SSFA2, OBP2B, CLU, POMC, MEGF11, PGBD5, COL9A1, SAA2, SAA1, BCL11A, LRRTM1, COL6A1, LRRC55, ZC3H12C, PITX2, GABRG3, ATRNL1, CHI3L2, C4BPA, CACNA1S, THSD7B, DKK4, C1QTNF9B, PGPEP1L, CEACAM22P, GRM6, TFAP2B, FAM155A, GPA33, CYP2A6, C2CD4A, ZNF385B, HAS3, UTP20, ATP6V0A4, PDZK1, KIF26B</i></b> |
| GAD_DISEASE_CLASS               | DEVELOPMENTAL           | 2.06               | 7.42E-03               | 0.06      | <i>CYP3A5, GABRG3, ESRRB, POMC, ZIC1, CACNA1S, COL9A1, NEDD4, LRRTM1, FAM155A, CYP2A6, TUBA4A, ZNF385B, C2CD4A, PITX2, KIF26B</i>                                                                                                                                                                                                        |
| GAD_DISEASE_CLASS               | CHEMDEPENDENCY          | 1.54               | 8.41E-03               | 0.05      | <i>CPLX3, POMC, KANK1, SEMA5B, COL9A1, PECR, SAA2, BCL11A, LRRTM1, COL6A1, LRRC55, PAPSS1, ZC3H12C, PITX2, GABRG3, ATRNL1, ESRRB, CHI3L2, CACNA1S, THSD7B, GRM6, HIVEP3, TFAP2B, GPA33, FAM155A, CYP2A6, ZNF385B, ATP6V0A4, KIF26B</i>                                                                                                   |
| GAD_DISEASE_CLASS               | PSYCH                   | 1.77               | 0.02                   | 0.08      | <i>CPLX3, CYP3A5, GABRG3, CES1, ATRNL1, PDLIM5, CLU, POMC, DKK4, PGBD5, SAA2, BCL11A, GRM6, TFAP2B, FAM155A, CYP2A6, ZNF385B, HAS3</i>                                                                                                                                                                                                   |
| GAD_DISEASE_CLASS               | CARDIOVASCULAR          | 1.41               | 0.02                   | 0.08      | <i>CSF3, CYP24A1, CYP3A5, CPLX3, CLU, CX3CL1, DEFB4A, POMC, MEGF11, PGBD5, COL9A1, PECR, SAA2, SAA1, LRRC55, PAPSS1, ZC3H12C, PITX2, C9ORF66, GABRG3, ATRNL1, THSD7B, TNNT2, NEDD4, HIVEP3, GPA33, FAM155A, ZNF385B, UTP20, PDZK1, KIF26B</i>                                                                                            |
| GAD_DISEASE_CLASS               | UNKNOWN                 | 1.80               | 0.03                   | 0.09      | <i>CYP3A5, CYP24A1, GABRG3, CES1, MLH1, POMC, CACNA1S, TNNT2, SAA1, NEDD4, BCL11A, PI3, TFAP2B, CYP2A6, COL6A1</i>                                                                                                                                                                                                                       |
| GAD_DISEASE_CLASS               | NEUROLOGICAL            | 1.47               | 0.05                   | 0.12      | <i>CYP3A5, GABRG3, ATRNL1, CLU, CHI3L2, CX3CL1, POMC, CACNA1S, THSD7B, SAA2, SAA1, LRRTM1, HIVEP3, TFAP2B, FAM155A, CYP2A6, COL6A1, ZNF385B, C2CD4A, PAPSS1, PITX2, KIF26B</i>                                                                                                                                                           |
| GAD_DISEASE_CLASS               | PHARMACOGENOMIC         | 1.50               | 0.05                   | 0.10      | <i>CSF3, CYP24A1, CYP3A5, CES1, CX3CL1, POMC, DKK4, PDZK1IP1, GPX2, TNNT2, COL9A1, SEMA5B, SAA2, SAA1, BCL11A, HIVEP3, TFAP2B, CYP2A6, HAS3, PDZK1, PITX2</i>                                                                                                                                                                            |
| GAD_DISEASE_CLASS               | OTHER                   | 1.70               | 0.06                   | 0.11      | <i>CSF3, CYP3A5, CYP24A1, MLH1, DEFB4A, POMC, PRKY, GPX2, COL9A1, LRRTM1, FAM155A, CYP2A6, COL6A1, PITX2</i>                                                                                                                                                                                                                             |
| GAD_DISEASE_CLASS               | CANCER                  | 1.33               | 0.11                   | 0.20      | <i>CSF3, CYP24A1, CYP3A5, CES1, TMEM213, ESRRB, PDLIM5, CLU, MLH1, C4BPA, CX3CL1, POMC, MEGF11, DKK4, EPM2AIP1, GPX2, SEMA5B, NEDD4, DEFA5, LRRTM1, CYP2A6, PAPSS1</i>                                                                                                                                                                   |
| GAD_DISEASE_CLASS               | HEMATOLOGICAL           | 1.39               | 0.25                   | 0.37      | <i>CSF3, CYP3A5, ATRNL1, SAA1, ESRRB, BCL11A, LRRTM1, FAM155A, C4BPA, ATP6V0A4, LGR6</i>                                                                                                                                                                                                                                                 |
| GAD_DISEASE_CLASS               | AGING                   | 1.43               | 0.35                   | 0.48      | <i>CYP3A5, SAA2, ATRNL1, PDLIM5, HIVEP3, MLH1, THSD7B</i>                                                                                                                                                                                                                                                                                |
| GAD_DISEASE_CLASS               | REPRODUCTION            | 1.41               | 0.36                   | 0.46      | <i>CSF3, CYP3A5, DEFA5, LRRTM1, TFAP2B, POMC, THSD7B</i>                                                                                                                                                                                                                                                                                 |
| GAD_DISEASE_CLASS               | VISION                  | 1.40               | 0.47                   | 0.56      | <i>GRM6, CLU, C4BPA, ATP6V0A4, PITX2</i>                                                                                                                                                                                                                                                                                                 |

Significantly enriched classes are in bold italics (adjusted p-value <0.05 used as significance cut-off)
