# Supplementary material for: Endometrial cancer risk and survival by tumor MMR status
Source: PubMed Central journal article supplement — J Gynecol Oncol. 2018 Feb 23;29(3):e39. doi: 10.3802/jgo.2018.29.e39 (PMC5920223; doi:10.3802/jgo.2018.29.e39), 2018-02-23
Supplement: jgo-29-e39-s007.pdf [file jgo-29-e39-s007.pdf]

**Supplementary Table 7. Details for 876 genes differentially expressed between assumed somatic MMR deficient and MMR proficient endometrioid tumors**

| Gene            | Up/ own regulated in somatic MMR deficient tumours | Fold change | -value   | Adjusted -value |
|-----------------|----------------------------------------------------|-------------|----------|-----------------|
| <i>MLH1</i>     | Down                                               | 0.24        | 3.05E-64 | 6.09E-60        |
| <i>EPM2AIP1</i> | Down                                               | 0.23        | 1.70E-56 | 1.70E-52        |
| <i>TRH</i>      | Down                                               | 0.02        | 5.53E-44 | 3.68E-40        |
| <i>MYH7B</i>    | Down                                               | 0.08        | 1.47E-36 | 7.32E-33        |
| <i>RNLS</i>     | Down                                               | 0.26        | 1.35E-34 | 5.40E-31        |
| <i>NTS</i>      | Up                                                 | 23.81       | 3.20E-30 | 1.06E-26        |
| <i>CACNA1S</i>  | Down                                               | 0.04        | 3.04E-27 | 8.67E-24        |
| <i>SPAG6</i>    | Down                                               | 0.03        | 5.21E-27 | 1.30E-23        |
| <i>WNT16</i>    | Down                                               | 0.10        | 1.18E-26 | 2.61E-23        |
| <i>WNT6</i>     | Down                                               | 0.16        | 7.99E-25 | 1.59E-21        |
| <i>SLC13A5</i>  | Down                                               | 0.12        | 1.57E-24 | 2.84E-21        |
| <i>FGF8</i>     | Down                                               | 0.09        | 4.82E-23 | 8.00E-20        |
| <i>SEZ6L</i>    | Down                                               | 0.07        | 6.85E-23 | 1.05E-19        |
| <i>MUCL1</i>    | Down                                               | 0.07        | 1.30E-22 | 1.85E-19        |
| <i>DEFA5</i>    | Down                                               | 0.01        | 2.16E-22 | 2.88E-19        |
| <i>ZNF300</i>   | Down                                               | 0.24        | 3.72E-22 | 4.64E-19        |
| <i>IQCA1</i>    | Down                                               | 0.20        | 4.61E-22 | 5.11E-19        |
| <i>CPXM2</i>    | Down                                               | 0.27        | 1.67E-21 | 1.75E-18        |
| <i>CST2</i>     | Down                                               | 0.11        | 2.65E-21 | 2.64E-18        |
| <i>NKD1</i>     | Down                                               | 0.19        | 3.34E-21 | 3.17E-18        |
| <i>ADAMTSL2</i> | Down                                               | 0.24        | 2.06E-20 | 1.87E-17        |
| <i>FMO2</i>     | Down                                               | 0.14        | 5.32E-20 | 4.62E-17        |
| <i>CYTL1</i>    | Down                                               | 0.19        | 1.08E-19 | 9.01E-17        |
| <i>DBH</i>      | Down                                               | 0.15        | 2.54E-19 | 2.03E-16        |
| <i>NEFH</i>     | Down                                               | 0.19        | 3.84E-19 | 2.95E-16        |
| <i>TMEM163</i>  | Down                                               | 0.31        | 1.05E-18 | 7.77E-16        |
| <i>CST1</i>     | Down                                               | 0.11        | 1.52E-18 | 1.09E-15        |
| <i>ZNF662</i>   | Down                                               | 0.33        | 3.76E-18 | 2.59E-15        |
| <i>CACNA2D3</i> | Down                                               | 0.31        | 8.39E-18 | 5.58E-15        |
| <i>LIX1</i>     | Down                                               | 0.14        | 1.12E-17 | 6.84E-15        |
| <i>C4orf39</i>  | Down                                               | 0.29        | 1.12E-17 | 6.84E-15        |
| <i>RGS22</i>    | Down                                               | 0.18        | 1.13E-17 | 6.84E-15        |
| <i>PRPH</i>     | Up                                                 | 3.96        | 1.36E-17 | 7.97E-15        |
| <i>TSHZ1</i>    | Up                                                 | 2.01        | 1.59E-17 | 9.08E-15        |
| <i>EIF5A2</i>   | Down                                               | 0.35        | 2.08E-17 | 1.12E-14        |
| <i>LRRC4C</i>   | Down                                               | 0.25        | 2.88E-17 | 1.51E-14        |
| <i>SLFN13</i>   | Down                                               | 0.33        | 3.11E-17 | 1.59E-14        |
| <i>C7orf13</i>  | Down                                               | 0.36        | 3.45E-17 | 1.72E-14        |
| <i>GPR155</i>   | Down                                               | 0.40        | 4.52E-17 | 2.20E-14        |
| <i>BMP4</i>     | Down                                               | 0.25        | 7.47E-17 | 3.55E-14        |
| <i>CHRNA3</i>   | Down                                               | 0.22        | 8.54E-17 | 3.96E-14        |
| <i>KLK4</i>     | Down                                               | 0.17        | 1.28E-16 | 5.79E-14        |
| <i>DPEP1</i>    | Down                                               | 0.19        | 1.60E-16 | 7.10E-14        |
| <i>CST4</i>     | Down                                               | 0.13        | 1.85E-16 | 8.01E-14        |

|                  |      |      |          |          |
|------------------|------|------|----------|----------|
| <i>SMC1B</i>     | Down | 0.24 | 2.11E-16 | 8.97E-14 |
| <i>FSTL4</i>     | Down | 0.24 | 3.12E-16 | 1.30E-13 |
| <i>CALML3</i>    | Down | 0.10 | 6.57E-16 | 2.57E-13 |
| <i>RASGRF1</i>   | Down | 0.25 | 7.16E-16 | 2.74E-13 |
| <i>ABHD12B</i>   | Down | 0.19 | 7.45E-16 | 2.80E-13 |
| <i>PRSS50</i>    | Down | 0.21 | 1.21E-15 | 4.46E-13 |
| <i>ADHFE1</i>    | Down | 0.37 | 1.24E-15 | 4.49E-13 |
| <i>EDN3</i>      | Down | 0.18 | 1.47E-15 | 5.23E-13 |
| <i>CD36</i>      | Down | 0.30 | 1.98E-15 | 6.94E-13 |
| <i>TWIST2</i>    | Down | 0.29 | 2.33E-15 | 8.02E-13 |
| <i>RUNX2</i>     | Down | 0.37 | 3.22E-15 | 1.09E-12 |
| <i>SLC8A3</i>    | Down | 0.20 | 3.85E-15 | 1.26E-12 |
| <i>ADAMTS14</i>  | Down | 0.40 | 4.35E-15 | 1.40E-12 |
| <i>ZNF311</i>    | Down | 0.33 | 4.76E-15 | 1.51E-12 |
| <i>NFE2</i>      | Down | 0.35 | 8.96E-15 | 2.79E-12 |
| <i>PAGE2</i>     | Down | 0.04 | 1.06E-14 | 3.24E-12 |
| <i>APOH</i>      | Down | 0.12 | 1.09E-14 | 3.28E-12 |
| <i>KBTBD12</i>   | Down | 0.30 | 1.14E-14 | 3.39E-12 |
| <i>GPR83</i>     | Down | 0.26 | 1.50E-14 | 4.39E-12 |
| <i>COL6A4P2</i>  | Down | 0.25 | 1.94E-14 | 5.61E-12 |
| <i>SNAP91</i>    | Down | 0.20 | 1.98E-14 | 5.64E-12 |
| <i>SHANK1</i>    | Down | 0.27 | 2.10E-14 | 5.90E-12 |
| <i>IL23A</i>     | Down | 0.42 | 4.49E-14 | 1.24E-11 |
| <i>ANKRD34C</i>  | Down | 0.14 | 4.82E-14 | 1.32E-11 |
| <i>TPH1</i>      | Down | 0.15 | 5.19E-14 | 1.40E-11 |
| <i>CELF4</i>     | Down | 0.33 | 5.37E-14 | 1.43E-11 |
| <i>EYA4</i>      | Down | 0.11 | 6.95E-14 | 1.82E-11 |
| <i>C9orf84</i>   | Down | 0.24 | 7.48E-14 | 1.94E-11 |
| <i>APCDD1</i>    | Down | 0.34 | 8.60E-14 | 2.20E-11 |
| <i>ZNF229</i>    | Down | 0.30 | 8.71E-14 | 2.20E-11 |
| <i>AKR1B10</i>   | Up   | 4.33 | 1.10E-13 | 2.74E-11 |
| <i>RBP1</i>      | Down | 0.40 | 1.65E-13 | 4.07E-11 |
| <i>LOC729799</i> | Down | 0.47 | 1.72E-13 | 4.18E-11 |
| <i>NOTUM</i>     | Down | 0.17 | 2.01E-13 | 4.84E-11 |
| <i>DEFA6</i>     | Down | 0.03 | 2.36E-13 | 5.60E-11 |
| <i>KIAA1239</i>  | Down | 0.09 | 2.46E-13 | 5.78E-11 |
| <i>SYCE1</i>     | Up   | 3.58 | 2.68E-13 | 6.21E-11 |
| <i>RASL11B</i>   | Down | 0.33 | 2.92E-13 | 6.63E-11 |
| <i>LYG1</i>      | Up   | 2.14 | 2.96E-13 | 6.63E-11 |
| <i>AMBN</i>      | Down | 0.07 | 3.07E-13 | 6.77E-11 |
| <i>BARX1</i>     | Up   | 4.99 | 3.09E-13 | 6.77E-11 |
| <i>PEBP4</i>     | Down | 0.22 | 3.37E-13 | 7.26E-11 |
| <i>BEST3</i>     | Down | 0.15 | 3.38E-13 | 7.26E-11 |
| <i>HOXC6</i>     | Up   | 4.54 | 3.78E-13 | 8.03E-11 |
| <i>CACNA1E</i>   | Down | 0.26 | 4.13E-13 | 8.68E-11 |
| <i>PMCH</i>      | Down | 0.21 | 4.38E-13 | 9.11E-11 |
| <i>TUBA3D</i>    | Down | 0.24 | 4.48E-13 | 9.20E-11 |
| <i>IL10</i>      | Down | 0.33 | 6.09E-13 | 1.24E-10 |
| <i>GFRA3</i>     | Down | 0.24 | 6.18E-13 | 1.24E-10 |
| <i>WNT3A</i>     | Up   | 3.89 | 6.23E-13 | 1.24E-10 |

|                 |      |      |          |          |
|-----------------|------|------|----------|----------|
| <i>NKD2</i>     | Down | 0.34 | 6.51E-13 | 1.29E-10 |
| <i>RFPL1S</i>   | Down | 0.30 | 6.75E-13 | 1.32E-10 |
| <i>CDO1</i>     | Down | 0.28 | 6.79E-13 | 1.32E-10 |
| <i>HOTAIR</i>   | Up   | 4.29 | 8.69E-13 | 1.65E-10 |
| <i>C1QL1</i>    | Up   | 3.92 | 9.91E-13 | 1.85E-10 |
| <i>C1orf59</i>  | Down | 0.43 | 1.12E-12 | 2.06E-10 |
| <i>CRTAC1</i>   | Down | 0.30 | 1.38E-12 | 2.52E-10 |
| <i>SP5</i>      | Down | 0.27 | 1.44E-12 | 2.61E-10 |
| <i>DKK4</i>     | Down | 0.08 | 1.48E-12 | 2.63E-10 |
| <i>CALCA</i>    | Up   | 6.52 | 1.48E-12 | 2.63E-10 |
| <i>KLKP1</i>    | Down | 0.18 | 1.50E-12 | 2.64E-10 |
| <i>ADAM32</i>   | Down | 0.44 | 1.51E-12 | 2.64E-10 |
| <i>FLJ35024</i> | Down | 0.50 | 1.58E-12 | 2.75E-10 |
| <i>CALML5</i>   | Down | 0.16 | 1.61E-12 | 2.76E-10 |
| <i>ZIK1</i>     | Down | 0.37 | 1.65E-12 | 2.79E-10 |
| <i>IGFBPL1</i>  | Down | 0.30 | 1.73E-12 | 2.90E-10 |
| <i>CCKBR</i>    | Up   | 3.87 | 2.12E-12 | 3.50E-10 |
| <i>TGM7</i>     | Up   | 4.40 | 2.55E-12 | 4.14E-10 |
| <i>LY6G6C</i>   | Down | 0.15 | 2.92E-12 | 4.70E-10 |
| <i>HOXC9</i>    | Up   | 5.86 | 4.08E-12 | 6.51E-10 |
| <i>SCGB1D4</i>  | Down | 0.14 | 4.15E-12 | 6.58E-10 |
| <i>HIF3A</i>    | Down | 0.30 | 4.98E-12 | 7.82E-10 |
| <i>AJAP1</i>    | Down | 0.30 | 5.90E-12 | 9.12E-10 |
| <i>SYT1</i>     | Down | 0.32 | 6.04E-12 | 9.22E-10 |
| <i>DNAJC12</i>  | Down | 0.40 | 6.05E-12 | 9.22E-10 |
| <i>ZNF334</i>   | Down | 0.35 | 6.43E-12 | 9.72E-10 |
| <i>OSBPL6</i>   | Down | 0.33 | 6.90E-12 | 1.03E-09 |
| <i>TXNDC3</i>   | Down | 0.34 | 9.73E-12 | 1.45E-09 |
| <i>RELN</i>     | Down | 0.24 | 1.08E-11 | 1.60E-09 |
| <i>FGF20</i>    | Down | 0.16 | 1.28E-11 | 1.88E-09 |
| <i>RNF212</i>   | Down | 0.27 | 1.42E-11 | 2.04E-09 |
| <i>DEPDC7</i>   | Down | 0.39 | 1.45E-11 | 2.07E-09 |
| <i>TYRP1</i>    | Down | 0.27 | 1.48E-11 | 2.10E-09 |
| <i>GAMT</i>     | Up   | 2.37 | 1.50E-11 | 2.10E-09 |
| <i>TSG1</i>     | Down | 0.22 | 1.51E-11 | 2.10E-09 |
| <i>NPTX2</i>    | Down | 0.40 | 1.54E-11 | 2.12E-09 |
| <i>FRMPD1</i>   | Down | 0.20 | 1.85E-11 | 2.51E-09 |
| <i>SERPIND1</i> | Down | 0.29 | 2.15E-11 | 2.88E-09 |
| <i>C2orf74</i>  | Down | 0.48 | 2.25E-11 | 2.99E-09 |
| <i>ZNF285</i>   | Down | 0.37 | 2.34E-11 | 3.09E-09 |
| <i>PROX1</i>    | Down | 0.29 | 2.62E-11 | 3.44E-09 |
| <i>KRT85</i>    | Down | 0.18 | 2.68E-11 | 3.49E-09 |
| <i>C18orf18</i> | Down | 0.44 | 2.84E-11 | 3.67E-09 |
| <i>TLX1</i>     | Up   | 7.73 | 2.85E-11 | 3.67E-09 |
| <i>TCAM1P</i>   | Down | 0.21 | 3.49E-11 | 4.46E-09 |
| <i>KISS1R</i>   | Up   | 3.11 | 3.66E-11 | 4.64E-09 |
| <i>KREMEN1</i>  | Down | 0.45 | 3.92E-11 | 4.94E-09 |
| <i>ALK</i>      | Down | 0.29 | 4.04E-11 | 5.07E-09 |
| <i>FAM135B</i>  | Down | 0.18 | 4.31E-11 | 5.38E-09 |
| <i>CA6</i>      | Down | 0.14 | 4.34E-11 | 5.38E-09 |

|                 |      |      |          |          |
|-----------------|------|------|----------|----------|
| <i>CPNE9</i>    | Down | 0.33 | 4.57E-11 | 5.62E-09 |
| <i>ALS2CR11</i> | Down | 0.28 | 4.97E-11 | 6.05E-09 |
| <i>SLCO1A2</i>  | Down | 0.41 | 5.67E-11 | 6.81E-09 |
| <i>CHODL</i>    | Down | 0.36 | 5.70E-11 | 6.81E-09 |
| <i>FAM43B</i>   | Down | 0.37 | 6.10E-11 | 7.25E-09 |
| <i>NELL1</i>    | Down | 0.23 | 6.29E-11 | 7.42E-09 |
| <i>SALL4</i>    | Down | 0.38 | 6.48E-11 | 7.61E-09 |
| <i>SLC30A10</i> | Down | 0.26 | 6.90E-11 | 8.01E-09 |
| <i>CHAD</i>     | Down | 0.45 | 6.91E-11 | 8.01E-09 |
| <i>FAM5B</i>    | Down | 0.26 | 6.99E-11 | 8.05E-09 |
| <i>F13A1</i>    | Down | 0.46 | 7.97E-11 | 9.13E-09 |
| <i>HPSE2</i>    | Down | 0.24 | 8.79E-11 | 1.00E-08 |
| <i>KCNA2</i>    | Down | 0.29 | 8.99E-11 | 1.02E-08 |
| <i>FAM163B</i>  | Down | 0.13 | 9.97E-11 | 1.12E-08 |
| <i>SOX30</i>    | Down | 0.43 | 1.02E-10 | 1.13E-08 |
| <i>KRT31</i>    | Down | 0.15 | 1.11E-10 | 1.23E-08 |
| <i>GPR64</i>    | Down | 0.28 | 1.18E-10 | 1.28E-08 |
| <i>CUX2</i>     | Down | 0.33 | 1.21E-10 | 1.31E-08 |
| <i>RBM20</i>    | Down | 0.46 | 1.33E-10 | 1.44E-08 |
| <i>LRP2</i>     | Down | 0.24 | 1.79E-10 | 1.91E-08 |
| <i>STK31</i>    | Down | 0.47 | 1.80E-10 | 1.91E-08 |
| <i>NRG2</i>     | Down | 0.40 | 1.83E-10 | 1.93E-08 |
| <i>RXFP4</i>    | Up   | 3.70 | 1.85E-10 | 1.95E-08 |
| <i>CXCL14</i>   | Down | 0.33 | 2.15E-10 | 2.24E-08 |
| <i>LY6H</i>     | Down | 0.34 | 2.15E-10 | 2.24E-08 |
| <i>GRM8</i>     | Down | 0.35 | 2.56E-10 | 2.63E-08 |
| <i>PTX3</i>     | Down | 0.40 | 2.58E-10 | 2.64E-08 |
| <i>MSMB</i>     | Down | 0.20 | 2.59E-10 | 2.64E-08 |
| <i>FMO3</i>     | Down | 0.37 | 2.78E-10 | 2.80E-08 |
| <i>HOXC11</i>   | Up   | 4.52 | 2.90E-10 | 2.91E-08 |
| <i>TNFSF8</i>   | Down | 0.38 | 2.97E-10 | 2.94E-08 |
| <i>SLCO2A1</i>  | Down | 0.47 | 2.99E-10 | 2.95E-08 |
| <i>ATOH8</i>    | Down | 0.45 | 3.15E-10 | 3.08E-08 |
| <i>SDR42E1</i>  | Down | 0.38 | 3.20E-10 | 3.11E-08 |
| <i>CHRNA6</i>   | Down | 0.39 | 3.29E-10 | 3.18E-08 |
| <i>TRIM58</i>   | Down | 0.35 | 3.31E-10 | 3.18E-08 |
| <i>AXIN2</i>    | Down | 0.47 | 3.32E-10 | 3.18E-08 |
| <i>CFI</i>      | Down | 0.47 | 3.48E-10 | 3.28E-08 |
| <i>TMEM108</i>  | Down | 0.35 | 3.62E-10 | 3.39E-08 |
| <i>ASTN1</i>    | Down | 0.34 | 3.81E-10 | 3.55E-08 |
| <i>RGS7BP</i>   | Down | 0.40 | 3.95E-10 | 3.65E-08 |
| <i>ODZ4</i>     | Down | 0.47 | 4.04E-10 | 3.72E-08 |
| <i>SLIT1</i>    | Down | 0.37 | 4.10E-10 | 3.75E-08 |
| <i>ABO</i>      | Down | 0.28 | 4.25E-10 | 3.86E-08 |
| <i>LYPD2</i>    | Down | 0.14 | 4.46E-10 | 4.03E-08 |
| <i>CELA3A</i>   | Up   | 3.60 | 4.72E-10 | 4.24E-08 |
| <i>TMEM26</i>   | Down | 0.40 | 4.75E-10 | 4.24E-08 |
| <i>CYP2A6</i>   | Down | 0.25 | 4.89E-10 | 4.36E-08 |
| <i>KLK8</i>     | Down | 0.27 | 5.14E-10 | 4.54E-08 |
| <i>CCDC81</i>   | Down | 0.44 | 5.14E-10 | 4.54E-08 |

|                  |      |      |          |          |
|------------------|------|------|----------|----------|
| <i>SDR16C5</i>   | Down | 0.24 | 5.28E-10 | 4.62E-08 |
| <i>CCBE1</i>     | Down | 0.29 | 5.80E-10 | 5.05E-08 |
| <i>SCN11A</i>    | Down | 0.44 | 5.87E-10 | 5.09E-08 |
| <i>CPS1</i>      | Up   | 2.80 | 6.00E-10 | 5.18E-08 |
| <i>IL13RA2</i>   | Down | 0.35 | 6.80E-10 | 5.85E-08 |
| <i>HOXA1</i>     | Up   | 2.56 | 7.28E-10 | 6.23E-08 |
| <i>TCAP</i>      | Down | 0.48 | 8.03E-10 | 6.79E-08 |
| <i>CD8B</i>      | Down | 0.40 | 8.14E-10 | 6.85E-08 |
| <i>MYOT</i>      | Down | 0.33 | 9.24E-10 | 7.63E-08 |
| <i>EDAR</i>      | Down | 0.34 | 9.25E-10 | 7.63E-08 |
| <i>SCN5A</i>     | Down | 0.45 | 9.52E-10 | 7.81E-08 |
| <i>C21orf130</i> | Down | 0.42 | 1.09E-09 | 8.91E-08 |
| <i>SLITRK4</i>   | Down | 0.25 | 1.13E-09 | 9.24E-08 |
| <i>ULBP1</i>     | Up   | 2.00 | 1.15E-09 | 9.36E-08 |
| <i>TRO</i>       | Down | 0.45 | 1.29E-09 | 1.03E-07 |
| <i>TACR1</i>     | Down | 0.36 | 1.32E-09 | 1.06E-07 |
| <i>ONECUT1</i>   | Up   | 3.46 | 1.51E-09 | 1.21E-07 |
| <i>SLC5A8</i>    | Down | 0.14 | 1.74E-09 | 1.38E-07 |
| <i>CXCL17</i>    | Down | 0.35 | 1.80E-09 | 1.42E-07 |
| <i>ALOX12P2</i>  | Down | 0.29 | 1.84E-09 | 1.45E-07 |
| <i>NBPF6</i>     | Down | 0.16 | 1.85E-09 | 1.45E-07 |
| <i>ZNF135</i>    | Down | 0.47 | 2.11E-09 | 1.64E-07 |
| <i>THSD4</i>     | Down | 0.43 | 2.46E-09 | 1.87E-07 |
| <i>CBLN2</i>     | Down | 0.23 | 2.47E-09 | 1.87E-07 |
| <i>FAM19A5</i>   | Down | 0.43 | 2.60E-09 | 1.96E-07 |
| <i>SYCP2</i>     | Down | 0.46 | 2.79E-09 | 2.08E-07 |
| <i>IGF2</i>      | Down | 0.39 | 3.00E-09 | 2.22E-07 |
| <i>ZNF717</i>    | Down | 0.47 | 3.08E-09 | 2.26E-07 |
| <i>HOXC10</i>    | Up   | 5.10 | 3.12E-09 | 2.28E-07 |
| <i>C8orf79</i>   | Down | 0.46 | 3.27E-09 | 2.38E-07 |
| <i>MME</i>       | Down | 0.45 | 3.30E-09 | 2.39E-07 |
| <i>ATP8A2</i>    | Down | 0.40 | 3.60E-09 | 2.59E-07 |
| <i>BMP7</i>      | Down | 0.40 | 3.63E-09 | 2.60E-07 |
| <i>NBPF4</i>     | Down | 0.19 | 3.75E-09 | 2.65E-07 |
| <i>C9orf125</i>  | Down | 0.37 | 3.78E-09 | 2.67E-07 |
| <i>GLB1L3</i>    | Down | 0.32 | 3.96E-09 | 2.78E-07 |
| <i>C8B</i>       | Down | 0.27 | 4.02E-09 | 2.80E-07 |
| <i>TSPYL5</i>    | Down | 0.47 | 4.04E-09 | 2.80E-07 |
| <i>TGM6</i>      | Down | 0.16 | 4.05E-09 | 2.80E-07 |
| <i>C18orf2</i>   | Down | 0.18 | 4.11E-09 | 2.83E-07 |
| <i>WIF1</i>      | Down | 0.27 | 4.50E-09 | 3.07E-07 |
| <i>C2orf58</i>   | Down | 0.43 | 4.97E-09 | 3.36E-07 |
| <i>SDK1</i>      | Down | 0.50 | 5.03E-09 | 3.39E-07 |
| <i>KIT</i>       | Down | 0.46 | 5.15E-09 | 3.46E-07 |
| <i>CRB2</i>      | Down | 0.43 | 5.18E-09 | 3.47E-07 |
| <i>TMEM233</i>   | Down | 0.35 | 5.72E-09 | 3.79E-07 |
| <i>HGC6.3</i>    | Down | 0.30 | 5.95E-09 | 3.93E-07 |
| <i>SPAG17</i>    | Down | 0.39 | 6.01E-09 | 3.94E-07 |
| <i>PSD2</i>      | Down | 0.39 | 6.06E-09 | 3.95E-07 |
| <i>GPIHBP1</i>   | Down | 0.40 | 7.06E-09 | 4.53E-07 |

|                        |      |      |          |          |
|------------------------|------|------|----------|----------|
| <i>JPH3</i>            | Down | 0.41 | 7.30E-09 | 4.67E-07 |
| <i>CFHR1</i>           | Down | 0.48 | 7.34E-09 | 4.68E-07 |
| <i>PNMA3</i>           | Down | 0.34 | 7.65E-09 | 4.85E-07 |
| <i>LOXL4</i>           | Down | 0.49 | 7.85E-09 | 4.96E-07 |
| <i>REN</i>             | Down | 0.43 | 8.03E-09 | 5.05E-07 |
| <i>SYT6</i>            | Down | 0.37 | 8.30E-09 | 5.20E-07 |
| <i>SLC27A6</i>         | Down | 0.45 | 8.31E-09 | 5.20E-07 |
| <i>KCNK9</i>           | Down | 0.32 | 8.41E-09 | 5.23E-07 |
| <i>MAP7D2</i>          | Down | 0.41 | 8.71E-09 | 5.36E-07 |
| <i>GSTA1</i>           | Down | 0.35 | 9.09E-09 | 5.58E-07 |
| <i>BMP2</i>            | Up   | 2.33 | 9.69E-09 | 5.89E-07 |
| <i>LIMS3-LOC440895</i> | Down | 0.44 | 1.04E-08 | 6.30E-07 |
| <i>C22orf31</i>        | Down | 0.32 | 1.06E-08 | 6.38E-07 |
| <i>GOLGA7B</i>         | Down | 0.39 | 1.12E-08 | 6.67E-07 |
| <i>RGS6</i>            | Down | 0.47 | 1.18E-08 | 6.99E-07 |
| <i>LPA</i>             | Down | 0.31 | 1.29E-08 | 7.55E-07 |
| <i>APOD</i>            | Down | 0.38 | 1.29E-08 | 7.54E-07 |
| <i>KIAA1383</i>        | Down | 0.46 | 1.30E-08 | 7.59E-07 |
| <i>MGC4473</i>         | Down | 0.32 | 1.43E-08 | 8.30E-07 |
| <i>DOK5</i>            | Down | 0.49 | 1.48E-08 | 8.53E-07 |
| <i>CYP2A7</i>          | Down | 0.24 | 1.49E-08 | 8.56E-07 |
| <i>PNMT</i>            | Down | 0.34 | 1.51E-08 | 8.67E-07 |
| <i>TFR2</i>            | Up   | 2.13 | 1.63E-08 | 9.27E-07 |
| <i>KCNA6</i>           | Down | 0.44 | 1.65E-08 | 9.36E-07 |
| <i>HS3ST4</i>          | Down | 0.14 | 1.66E-08 | 9.36E-07 |
| <i>SFRP5</i>           | Down | 0.28 | 1.76E-08 | 9.91E-07 |
| <i>GSDMA</i>           | Down | 0.40 | 1.76E-08 | 9.90E-07 |
| <i>HEPHL1</i>          | Down | 0.35 | 1.77E-08 | 9.93E-07 |
| <i>CHI3L2</i>          | Down | 0.39 | 1.82E-08 | 1.02E-06 |
| <i>WNT10A</i>          | Down | 0.40 | 1.83E-08 | 1.02E-06 |
| <i>MPV17L</i>          | Down | 0.39 | 1.86E-08 | 1.04E-06 |
| <i>GAST</i>            | Up   | 4.34 | 1.93E-08 | 1.07E-06 |
| <i>SCN3B</i>           | Down | 0.45 | 2.12E-08 | 1.15E-06 |
| <i>JSRP1</i>           | Up   | 2.38 | 2.23E-08 | 1.20E-06 |
| <i>P2RY14</i>          | Down | 0.48 | 2.53E-08 | 1.35E-06 |
| <i>TMEM212</i>         | Down | 0.37 | 2.73E-08 | 1.45E-06 |
| <i>ISM1</i>            | Down | 0.50 | 2.73E-08 | 1.45E-06 |
| <i>COLEC10</i>         | Down | 0.39 | 3.03E-08 | 1.57E-06 |
| <i>C8orf46</i>         | Down | 0.46 | 3.05E-08 | 1.58E-06 |
| <i>NRAP</i>            | Down | 0.39 | 3.33E-08 | 1.71E-06 |
| <i>CDH22</i>           | Down | 0.28 | 3.42E-08 | 1.75E-06 |
| <i>HOXC13</i>          | Up   | 6.25 | 3.48E-08 | 1.77E-06 |
| <i>CD109</i>           | Down | 0.46 | 3.67E-08 | 1.85E-06 |
| <i>CPB1</i>            | Down | 0.22 | 3.82E-08 | 1.90E-06 |
| <i>F12</i>             | Up   | 2.02 | 3.82E-08 | 1.90E-06 |
| <i>C17orf55</i>        | Up   | 3.35 | 4.06E-08 | 2.00E-06 |
| <i>BSX</i>             | Down | 0.09 | 4.25E-08 | 2.07E-06 |
| <i>GPR141</i>          | Down | 0.45 | 4.51E-08 | 2.18E-06 |
| <i>C3orf30</i>         | Down | 0.24 | 4.59E-08 | 2.21E-06 |
| <i>MGAT5B</i>          | Down | 0.37 | 4.62E-08 | 2.22E-06 |

|                     |      |      |          |          |
|---------------------|------|------|----------|----------|
| <i>HMGCLL1</i>      | Down | 0.26 | 4.83E-08 | 2.31E-06 |
| <i>MYO16</i>        | Down | 0.36 | 4.98E-08 | 2.36E-06 |
| <i>HTR3C</i>        | Down | 0.25 | 5.15E-08 | 2.43E-06 |
| <i>FGF19</i>        | Down | 0.28 | 5.71E-08 | 2.67E-06 |
| <i>BNC1</i>         | Down | 0.25 | 5.75E-08 | 2.68E-06 |
| <i>IRX1</i>         | Down | 0.12 | 5.90E-08 | 2.74E-06 |
| <i>FGF3</i>         | Down | 0.15 | 6.32E-08 | 2.93E-06 |
| <i>ERP27</i>        | Down | 0.48 | 6.45E-08 | 2.98E-06 |
| <i>CA2</i>          | Up   | 2.03 | 6.88E-08 | 3.16E-06 |
| <i>RTN4RL2</i>      | Up   | 2.15 | 6.92E-08 | 3.17E-06 |
| <i>GLRA2</i>        | Down | 0.36 | 7.48E-08 | 3.41E-06 |
| <i>HCG4</i>         | Down | 0.35 | 7.49E-08 | 3.41E-06 |
| <i>LTK</i>          | Up   | 2.32 | 7.59E-08 | 3.44E-06 |
| <i>GP2</i>          | Down | 0.15 | 7.60E-08 | 3.44E-06 |
| <i>ADAMTS16</i>     | Down | 0.45 | 7.79E-08 | 3.51E-06 |
| <i>ALPK3</i>        | Down | 0.45 | 7.87E-08 | 3.54E-06 |
| <i>KRTDAP</i>       | Down | 0.40 | 8.16E-08 | 3.63E-06 |
| <i>LY6G6E</i>       | Down | 0.22 | 8.56E-08 | 3.79E-06 |
| <i>CALCB</i>        | Up   | 3.22 | 9.27E-08 | 4.09E-06 |
| <i>THSD7B</i>       | Down | 0.43 | 9.59E-08 | 4.21E-06 |
| <i>MEG3</i>         | Down | 0.48 | 9.75E-08 | 4.26E-06 |
| <i>CECR2</i>        | Down | 0.42 | 1.05E-07 | 4.54E-06 |
| <i>C7orf52</i>      | Down | 0.30 | 1.08E-07 | 4.66E-06 |
| <i>NGFR</i>         | Down | 0.46 | 1.08E-07 | 4.66E-06 |
| <i>MYT1</i>         | Down | 0.28 | 1.09E-07 | 4.66E-06 |
| <i>TMEM132C</i>     | Down | 0.28 | 1.11E-07 | 4.72E-06 |
| <i>SLCO6A1</i>      | Down | 0.12 | 1.13E-07 | 4.81E-06 |
| <i>C3orf57</i>      | Down | 0.41 | 1.22E-07 | 5.15E-06 |
| <i>SLC25A35</i>     | Down | 0.48 | 1.28E-07 | 5.37E-06 |
| <i>EFNA2</i>        | Up   | 4.69 | 1.29E-07 | 5.44E-06 |
| <i>C8orf48</i>      | Down | 0.46 | 1.30E-07 | 5.46E-06 |
| <i>CTNNA2</i>       | Down | 0.43 | 1.34E-07 | 5.62E-06 |
| <i>NRN1</i>         | Up   | 2.04 | 1.37E-07 | 5.71E-06 |
| <i>IGLON5</i>       | Down | 0.43 | 1.43E-07 | 5.91E-06 |
| <i>LCN10</i>        | Down | 0.42 | 1.45E-07 | 5.99E-06 |
| <i>NTF3</i>         | Down | 0.49 | 1.46E-07 | 6.01E-06 |
| <i>FAM24B</i>       | Down | 0.41 | 1.47E-07 | 6.01E-06 |
| <i>LOC100132354</i> | Down | 0.21 | 1.50E-07 | 6.14E-06 |
| <i>CCDC158</i>      | Down | 0.44 | 1.57E-07 | 6.37E-06 |
| <i>CLDN2</i>        | Down | 0.30 | 1.58E-07 | 6.39E-06 |
| <i>CACNG6</i>       | Down | 0.31 | 1.64E-07 | 6.59E-06 |
| <i>PRMT8</i>        | Down | 0.32 | 2.01E-07 | 7.99E-06 |
| <i>SERPINA11</i>    | Down | 0.25 | 2.34E-07 | 9.16E-06 |
| <i>PTGS2</i>        | Up   | 2.40 | 2.45E-07 | 9.53E-06 |
| <i>RGN</i>          | Down | 0.46 | 2.53E-07 | 9.76E-06 |
| <i>DLX2</i>         | Up   | 3.24 | 2.53E-07 | 9.76E-06 |
| <i>CORIN</i>        | Down | 0.49 | 2.61E-07 | 1.01E-05 |
| <i>FLJ16779</i>     | Down | 0.39 | 2.64E-07 | 1.01E-05 |
| <i>NRXN3</i>        | Down | 0.44 | 2.65E-07 | 1.01E-05 |
| <i>SCNN1B</i>       | Down | 0.42 | 2.68E-07 | 1.03E-05 |

|                  |      |      |          |          |
|------------------|------|------|----------|----------|
| <i>GATA4</i>     | Up   | 4.06 | 2.70E-07 | 1.03E-05 |
| <i>DPT</i>       | Down | 0.42 | 2.88E-07 | 1.09E-05 |
| <i>WDR16</i>     | Down | 0.36 | 2.98E-07 | 1.12E-05 |
| <i>ATP1A2</i>    | Down | 0.38 | 3.01E-07 | 1.13E-05 |
| <i>PCSK1N</i>    | Down | 0.46 | 3.02E-07 | 1.13E-05 |
| <i>FABP4</i>     | Down | 0.36 | 3.03E-07 | 1.14E-05 |
| <i>LOC441666</i> | Down | 0.38 | 3.09E-07 | 1.16E-05 |
| <i>KLK7</i>      | Down | 0.37 | 3.31E-07 | 1.23E-05 |
| <i>KRT34</i>     | Down | 0.28 | 3.33E-07 | 1.24E-05 |
| <i>GABRR1</i>    | Down | 0.40 | 3.35E-07 | 1.24E-05 |
| <i>GALNT13</i>   | Down | 0.38 | 3.36E-07 | 1.24E-05 |
| <i>HOXA3</i>     | Up   | 2.14 | 3.48E-07 | 1.28E-05 |
| <i>SORCS1</i>    | Down | 0.41 | 3.55E-07 | 1.30E-05 |
| <i>APCDD1L</i>   | Down | 0.38 | 3.64E-07 | 1.33E-05 |
| <i>C5orf38</i>   | Down | 0.31 | 3.65E-07 | 1.33E-05 |
| <i>LOC254559</i> | Down | 0.44 | 3.70E-07 | 1.35E-05 |
| <i>SCGB1D1</i>   | Down | 0.22 | 3.77E-07 | 1.36E-05 |
| <i>TUBA3E</i>    | Down | 0.36 | 3.87E-07 | 1.39E-05 |
| <i>TDRD12</i>    | Down | 0.29 | 3.89E-07 | 1.40E-05 |
| <i>CCR3</i>      | Down | 0.41 | 3.98E-07 | 1.42E-05 |
| <i>ADRB2</i>     | Down | 0.50 | 4.30E-07 | 1.51E-05 |
| <i>GOLGA6L1</i>  | Down | 0.43 | 4.53E-07 | 1.58E-05 |
| <i>SCN1A</i>     | Down | 0.34 | 4.61E-07 | 1.60E-05 |
| <i>COL9A3</i>    | Down | 0.43 | 4.77E-07 | 1.66E-05 |
| <i>CCDC129</i>   | Down | 0.42 | 4.88E-07 | 1.69E-05 |
| <i>PAX7</i>      | Down | 0.16 | 4.93E-07 | 1.70E-05 |
| <i>ATP2B3</i>    | Down | 0.34 | 4.96E-07 | 1.70E-05 |
| <i>CHGB</i>      | Down | 0.42 | 5.15E-07 | 1.76E-05 |
| <i>SPAG11B</i>   | Down | 0.27 | 5.19E-07 | 1.77E-05 |
| <i>NGB</i>       | Down | 0.24 | 5.34E-07 | 1.81E-05 |
| <i>PAGE2B</i>    | Down | 0.17 | 5.42E-07 | 1.82E-05 |
| <i>SP7</i>       | Down | 0.25 | 5.43E-07 | 1.82E-05 |
| <i>SLC7A2</i>    | Up   | 2.44 | 5.51E-07 | 1.84E-05 |
| <i>PTPLA</i>     | Down | 0.49 | 5.61E-07 | 1.87E-05 |
| <i>SERPINA12</i> | Down | 0.22 | 5.70E-07 | 1.90E-05 |
| <i>OR1Q1</i>     | Down | 0.27 | 6.04E-07 | 1.99E-05 |
| <i>CDH17</i>     | Up   | 2.52 | 6.16E-07 | 2.02E-05 |
| <i>NTRK3</i>     | Down | 0.49 | 6.27E-07 | 2.05E-05 |
| <i>LOC157381</i> | Down | 0.40 | 6.38E-07 | 2.08E-05 |
| <i>KRT33B</i>    | Down | 0.16 | 6.46E-07 | 2.10E-05 |
| <i>ATP1A4</i>    | Down | 0.37 | 6.49E-07 | 2.11E-05 |
| <i>CNPY1</i>     | Down | 0.14 | 6.51E-07 | 2.11E-05 |
| <i>WNT11</i>     | Down | 0.43 | 6.59E-07 | 2.12E-05 |
| <i>NTRK2</i>     | Up   | 2.16 | 6.91E-07 | 2.21E-05 |
| <i>BNIPL</i>     | Down | 0.49 | 7.04E-07 | 2.25E-05 |
| <i>PTPRT</i>     | Down | 0.31 | 7.08E-07 | 2.26E-05 |
| <i>USP44</i>     | Down | 0.49 | 7.37E-07 | 2.33E-05 |
| <i>LHX1</i>      | Down | 0.22 | 7.41E-07 | 2.34E-05 |
| <i>C20orf197</i> | Down | 0.46 | 7.65E-07 | 2.41E-05 |
| <i>HYDIN</i>     | Down | 0.45 | 7.82E-07 | 2.45E-05 |



|            |      |      |          |          |
|------------|------|------|----------|----------|
| ZNF486     | Down | 0.43 | 7.95E-07 | 2.49E-05 |
| RSPH9      | Down | 0.41 | 8.09E-07 | 2.52E-05 |
| NPW        | Up   | 2.06 | 8.10E-07 | 2.53E-05 |
| LOC389033  | Down | 0.37 | 8.22E-07 | 2.55E-05 |
| GOLGA6L6   | Down | 0.46 | 8.27E-07 | 2.57E-05 |
| CDH20      | Down | 0.41 | 8.94E-07 | 2.75E-05 |
| FAM178B    | Down | 0.46 | 9.12E-07 | 2.80E-05 |
| ANKRD7     | Down | 0.35 | 9.16E-07 | 2.81E-05 |
| CACNA1I    | Down | 0.39 | 9.26E-07 | 2.83E-05 |
| MSH4       | Up   | 2.17 | 9.36E-07 | 2.86E-05 |
| PRSS45     | Down | 0.41 | 9.45E-07 | 2.88E-05 |
| TCHH       | Down | 0.47 | 9.50E-07 | 2.89E-05 |
| ODAM       | Down | 0.30 | 9.52E-07 | 2.89E-05 |
| RNF182     | Down | 0.41 | 9.62E-07 | 2.92E-05 |
| SCGB1A1    | Down | 0.31 | 9.83E-07 | 2.96E-05 |
| PEG10      | Up   | 2.31 | 1.02E-06 | 3.04E-05 |
| SYT14      | Down | 0.30 | 1.03E-06 | 3.08E-05 |
| HOXA9      | Up   | 2.20 | 1.05E-06 | 3.11E-05 |
| HAVCR1     | Up   | 2.99 | 1.08E-06 | 3.22E-05 |
| DCX        | Up   | 2.95 | 1.09E-06 | 3.24E-05 |
| HOXA6      | Up   | 2.29 | 1.13E-06 | 3.35E-05 |
| GSTA2      | Down | 0.43 | 1.16E-06 | 3.43E-05 |
| CCDC67     | Down | 0.26 | 1.18E-06 | 3.46E-05 |
| DMBT1      | Down | 0.35 | 1.21E-06 | 3.52E-05 |
| PON1       | Down | 0.28 | 1.30E-06 | 3.72E-05 |
| HHLA2      | Down | 0.48 | 1.30E-06 | 3.73E-05 |
| NCRNA00164 | Down | 0.40 | 1.31E-06 | 3.74E-05 |
| HAO2       | Down | 0.31 | 1.37E-06 | 3.88E-05 |
| MYLK3      | Down | 0.50 | 1.41E-06 | 3.98E-05 |
| LOC401387  | Down | 0.44 | 1.43E-06 | 4.02E-05 |
| CRYM       | Down | 0.43 | 1.47E-06 | 4.10E-05 |
| FXVD2      | Up   | 2.27 | 1.47E-06 | 4.10E-05 |
| MMP1       | Up   | 2.17 | 1.50E-06 | 4.19E-05 |
| CUZD1      | Down | 0.45 | 1.51E-06 | 4.20E-05 |
| VWA5B1     | Down | 0.37 | 1.53E-06 | 4.24E-05 |
| PLG        | Down | 0.43 | 1.56E-06 | 4.33E-05 |
| DCDC2B     | Down | 0.39 | 1.63E-06 | 4.50E-05 |
| ADARB2     | Down | 0.45 | 1.65E-06 | 4.55E-05 |
| TRPC3      | Down | 0.49 | 1.74E-06 | 4.76E-05 |
| GRIN2A     | Down | 0.45 | 1.77E-06 | 4.82E-05 |
| KIAA0802   | Down | 0.49 | 1.77E-06 | 4.80E-05 |
| REG3A      | Down | 0.09 | 1.81E-06 | 4.89E-05 |
| C9orf4     | Down | 0.38 | 1.89E-06 | 5.10E-05 |
| FLG        | Down | 0.40 | 1.91E-06 | 5.15E-05 |
| GPX5       | Down | 0.19 | 1.93E-06 | 5.17E-05 |
| LGSN       | Down | 0.34 | 2.01E-06 | 5.32E-05 |
| NEU4       | Down | 0.42 | 2.01E-06 | 5.32E-05 |
| OTOS       | Up   | 3.51 | 2.02E-06 | 5.34E-05 |
| C1orf157   | Down | 0.47 | 2.05E-06 | 5.40E-05 |
| UGT1A6     | Up   | 2.95 | 2.07E-06 | 5.45E-05 |

|                 |      |      |          |          |
|-----------------|------|------|----------|----------|
| <i>CHRNA4</i>   | Down | 0.48 | 2.11E-06 | 5.54E-05 |
| <i>TWIST1</i>   | Down | 0.49 | 2.18E-06 | 5.70E-05 |
| <i>PAPPA2</i>   | Down | 0.37 | 2.36E-06 | 6.11E-05 |
| <i>RFPL4A</i>   | Down | 0.39 | 2.36E-06 | 6.11E-05 |
| <i>CLIC6</i>    | Down | 0.41 | 2.42E-06 | 6.24E-05 |
| <i>XDH</i>      | Up   | 2.32 | 2.53E-06 | 6.47E-05 |
| <i>TUBA3C</i>   | Down | 0.37 | 2.54E-06 | 6.48E-05 |
| <i>TPRXL</i>    | Down | 0.50 | 2.67E-06 | 6.79E-05 |
| <i>CNR1</i>     | Down | 0.46 | 2.70E-06 | 6.84E-05 |
| <i>AMTN</i>     | Down | 0.15 | 2.85E-06 | 7.17E-05 |
| <i>CPN2</i>     | Down | 0.23 | 2.86E-06 | 7.17E-05 |
| <i>C11orf36</i> | Down | 0.28 | 2.88E-06 | 7.20E-05 |
| <i>FMN2</i>     | Down | 0.43 | 2.92E-06 | 7.28E-05 |
| <i>DGCR5</i>    | Up   | 2.27 | 3.12E-06 | 7.71E-05 |
| <i>C21orf99</i> | Down | 0.43 | 3.21E-06 | 7.89E-05 |
| <i>RSPO4</i>    | Down | 0.36 | 3.22E-06 | 7.90E-05 |
| <i>SPINK2</i>   | Down | 0.40 | 3.23E-06 | 7.90E-05 |
| <i>C2orf89</i>  | Down | 0.48 | 3.36E-06 | 8.18E-05 |
| <i>LSAMP</i>    | Down | 0.47 | 3.44E-06 | 8.35E-05 |
| <i>ZDHHC19</i>  | Down | 0.44 | 3.50E-06 | 8.45E-05 |
| <i>LINGO3</i>   | Up   | 2.69 | 3.63E-06 | 8.74E-05 |
| <i>C16orf73</i> | Down | 0.31 | 3.72E-06 | 8.92E-05 |
| <i>HIST1H3C</i> | Down | 0.44 | 3.73E-06 | 8.92E-05 |
| <i>GRIK3</i>    | Down | 0.50 | 3.73E-06 | 8.92E-05 |
| <i>DHRS9</i>    | Down | 0.43 | 3.77E-06 | 9.00E-05 |
| <i>LRTM1</i>    | Down | 0.26 | 3.79E-06 | 9.03E-05 |
| <i>ABCC11</i>   | Down | 0.49 | 3.80E-06 | 9.03E-05 |
| <i>C3orf36</i>  | Down | 0.48 | 3.91E-06 | 9.19E-05 |
| <i>PSG1</i>     | Down | 0.27 | 3.97E-06 | 9.31E-05 |
| <i>ISL1</i>     | Up   | 2.27 | 4.11E-06 | 9.63E-05 |
| <i>INS-IGF2</i> | Down | 0.42 | 4.14E-06 | 9.67E-05 |
| <i>DDX25</i>    | Down | 0.31 | 4.15E-06 | 9.68E-05 |
| <i>KLK6</i>     | Down | 0.45 | 4.29E-06 | 9.93E-05 |
| <i>KCNJ15</i>   | Down | 0.44 | 4.40E-06 | 1.01E-04 |
| <i>FMO6P</i>    | Down | 0.39 | 4.53E-06 | 1.04E-04 |
| <i>DRD2</i>     | Down | 0.43 | 4.54E-06 | 1.04E-04 |
| <i>RHOXF2B</i>  | Down | 0.31 | 4.57E-06 | 1.04E-04 |
| <i>KRTAP1-5</i> | Down | 0.40 | 4.62E-06 | 1.05E-04 |
| <i>MS4A15</i>   | Down | 0.40 | 4.74E-06 | 1.08E-04 |
| <i>ALOX15</i>   | Down | 0.41 | 4.97E-06 | 1.12E-04 |
| <i>TGM3</i>     | Up   | 2.11 | 5.01E-06 | 1.13E-04 |
| <i>AMBP</i>     | Up   | 2.29 | 5.15E-06 | 1.16E-04 |
| <i>HMP19</i>    | Down | 0.31 | 5.18E-06 | 1.17E-04 |
| <i>CCDC155</i>  | Down | 0.47 | 5.21E-06 | 1.17E-04 |
| <i>HOXA5</i>    | Up   | 2.14 | 5.23E-06 | 1.17E-04 |
| <i>VSIG2</i>    | Down | 0.39 | 5.29E-06 | 1.19E-04 |
| <i>TMEFF2</i>   | Down | 0.25 | 5.47E-06 | 1.22E-04 |
| <i>PCP4</i>     | Down | 0.42 | 5.63E-06 | 1.26E-04 |
| <i>GDNF</i>     | Down | 0.33 | 5.74E-06 | 1.28E-04 |
| <i>PCDH10</i>   | Down | 0.40 | 5.94E-06 | 1.32E-04 |

|                      |      |      |          |          |
|----------------------|------|------|----------|----------|
| <i>BEX5</i>          | Up   | 2.24 | 5.98E-06 | 1.33E-04 |
| <i>KRT17</i>         | Down | 0.46 | 6.15E-06 | 1.36E-04 |
| <i>ASCL1</i>         | Up   | 3.28 | 6.34E-06 | 1.40E-04 |
| <i>IL12A</i>         | Down | 0.48 | 6.44E-06 | 1.41E-04 |
| <i>IRX6</i>          | Down | 0.32 | 6.50E-06 | 1.41E-04 |
| <i>TCEAL2</i>        | Up   | 2.72 | 6.75E-06 | 1.46E-04 |
| <i>DLL3</i>          | Up   | 2.47 | 6.80E-06 | 1.47E-04 |
| <i>PROK2</i>         | Down | 0.39 | 6.98E-06 | 1.51E-04 |
| <i>LOC642587</i>     | Down | 0.50 | 7.07E-06 | 1.52E-04 |
| <i>ITIH5L</i>        | Down | 0.31 | 7.08E-06 | 1.52E-04 |
| <i>SYN3</i>          | Down | 0.45 | 7.10E-06 | 1.53E-04 |
| <i>SP8</i>           | Down | 0.27 | 7.26E-06 | 1.55E-04 |
| <i>LOC644669</i>     | Down | 0.37 | 7.52E-06 | 1.60E-04 |
| <i>C10orf90</i>      | Down | 0.33 | 7.64E-06 | 1.62E-04 |
| <i>MUC4</i>          | Down | 0.42 | 7.66E-06 | 1.62E-04 |
| <i>FAM154A</i>       | Down | 0.43 | 7.84E-06 | 1.66E-04 |
| <i>TTLL2</i>         | Down | 0.49 | 7.91E-06 | 1.67E-04 |
| <i>MUC7</i>          | Down | 0.23 | 8.14E-06 | 1.71E-04 |
| <i>KRTAP11-1</i>     | Down | 0.17 | 8.49E-06 | 1.77E-04 |
| <i>CYP2A13</i>       | Down | 0.27 | 8.75E-06 | 1.82E-04 |
| <i>NDST3</i>         | Down | 0.44 | 8.75E-06 | 1.82E-04 |
| <i>OR2W3</i>         | Down | 0.44 | 8.83E-06 | 1.83E-04 |
| <i>HRASLS</i>        | Down | 0.49 | 9.00E-06 | 1.86E-04 |
| <i>C8orf85</i>       | Down | 0.40 | 9.06E-06 | 1.87E-04 |
| <i>CLCA2</i>         | Down | 0.36 | 9.11E-06 | 1.88E-04 |
| <i>DLK1</i>          | Down | 0.21 | 9.13E-06 | 1.88E-04 |
| <i>ENDOU</i>         | Down | 0.44 | 9.26E-06 | 1.90E-04 |
| <i>AGT</i>           | Down | 0.49 | 9.40E-06 | 1.93E-04 |
| <i>ANKRD26P1</i>     | Down | 0.19 | 9.60E-06 | 1.97E-04 |
| <i>DKK1</i>          | Down | 0.32 | 9.63E-06 | 1.97E-04 |
| <i>FAM3B</i>         | Down | 0.47 | 9.65E-06 | 1.97E-04 |
| <i>HOXC8</i>         | Up   | 3.14 | 1.02E-05 | 2.06E-04 |
| <i>PLXNA4</i>        | Down | 0.46 | 1.13E-05 | 2.25E-04 |
| <i>DKFZp686A1627</i> | Down | 0.27 | 1.19E-05 | 2.36E-04 |
| <i>GAL3ST3</i>       | Down | 0.38 | 1.22E-05 | 2.41E-04 |
| <i>Mar-10</i>        | Down | 0.42 | 1.22E-05 | 2.41E-04 |
| <i>CD300LG</i>       | Down | 0.44 | 1.23E-05 | 2.42E-04 |
| <i>HOXA2</i>         | Up   | 2.27 | 1.24E-05 | 2.45E-04 |
| <i>EPHA8</i>         | Up   | 2.83 | 1.25E-05 | 2.45E-04 |
| <i>TREML2</i>        | Down | 0.49 | 1.32E-05 | 2.58E-04 |
| <i>CDHR5</i>         | Up   | 2.38 | 1.33E-05 | 2.61E-04 |
| <i>FGF12</i>         | Down | 0.49 | 1.34E-05 | 2.62E-04 |
| <i>NKX2-2</i>        | Up   | 4.56 | 1.36E-05 | 2.65E-04 |
| <i>XAGE2</i>         | Down | 0.09 | 1.39E-05 | 2.71E-04 |
| <i>PDCL2</i>         | Down | 0.21 | 1.45E-05 | 2.80E-04 |
| <i>HIST1H2BI</i>     | Down | 0.47 | 1.45E-05 | 2.80E-04 |
| <i>ADRA1D</i>        | Down | 0.49 | 1.46E-05 | 2.81E-04 |
| <i>TMEM89</i>        | Down | 0.43 | 1.47E-05 | 2.82E-04 |
| <i>DBX2</i>          | Down | 0.30 | 1.49E-05 | 2.85E-04 |
| <i>LEMD1</i>         | Down | 0.48 | 1.52E-05 | 2.89E-04 |

|                   |      |      |          |          |
|-------------------|------|------|----------|----------|
| <i>TMEM31</i>     | Down | 0.48 | 1.53E-05 | 2.90E-04 |
| <i>GABRA3</i>     | Down | 0.26 | 1.57E-05 | 2.96E-04 |
| <i>DCAF12L1</i>   | Down | 0.35 | 1.57E-05 | 2.96E-04 |
| <i>SLC14A1</i>    | Down | 0.43 | 1.65E-05 | 3.09E-04 |
| <i>CYP4F11</i>    | Up   | 2.03 | 1.66E-05 | 3.11E-04 |
| <i>SLC46A2</i>    | Down | 0.48 | 1.69E-05 | 3.14E-04 |
| <i>ARHGDIG</i>    | Up   | 2.58 | 1.73E-05 | 3.21E-04 |
| <i>HTR2C</i>      | Down | 0.20 | 1.78E-05 | 3.27E-04 |
| <i>MAGEA9B</i>    | Down | 0.21 | 1.78E-05 | 3.27E-04 |
| <i>IGFN1</i>      | Down | 0.46 | 1.78E-05 | 3.27E-04 |
| <i>PDX1</i>       | Up   | 3.33 | 1.78E-05 | 3.28E-04 |
| <i>CPLX3</i>      | Up   | 2.82 | 1.80E-05 | 3.30E-04 |
| <i>KCNJ12</i>     | Down | 0.48 | 1.84E-05 | 3.36E-04 |
| <i>KIAA1210</i>   | Down | 0.49 | 1.85E-05 | 3.37E-04 |
| <i>ITLN2</i>      | Down | 0.36 | 1.87E-05 | 3.40E-04 |
| <i>GRM3</i>       | Down | 0.40 | 1.87E-05 | 3.40E-04 |
| <i>LMAN1L</i>     | Up   | 3.33 | 1.94E-05 | 3.51E-04 |
| <i>C3orf67</i>    | Down | 0.49 | 1.98E-05 | 3.57E-04 |
| <i>PPARGC1A</i>   | Down | 0.49 | 2.02E-05 | 3.63E-04 |
| <i>TMEM40</i>     | Down | 0.49 | 2.05E-05 | 3.68E-04 |
| <i>VSNL1</i>      | Down | 0.43 | 2.09E-05 | 3.74E-04 |
| <i>LOC388387</i>  | Down | 0.37 | 2.11E-05 | 3.76E-04 |
| <i>LOC285954</i>  | Down | 0.45 | 2.12E-05 | 3.77E-04 |
| <i>LOC286467</i>  | Down | 0.46 | 2.14E-05 | 3.80E-04 |
| <i>CES1</i>       | Up   | 2.16 | 2.15E-05 | 3.81E-04 |
| <i>ABCC12</i>     | Down | 0.33 | 2.17E-05 | 3.83E-04 |
| <i>VCX</i>        | Down | 0.46 | 2.24E-05 | 3.94E-04 |
| <i>FGB</i>        | Up   | 3.21 | 2.33E-05 | 4.07E-04 |
| <i>KRT74</i>      | Down | 0.35 | 2.35E-05 | 4.10E-04 |
| <i>ENPP6</i>      | Down | 0.50 | 2.35E-05 | 4.09E-04 |
| <i>CYP2F1</i>     | Down | 0.45 | 2.41E-05 | 4.18E-04 |
| <i>C4orf7</i>     | Down | 0.33 | 2.49E-05 | 4.30E-04 |
| <i>NCRNA00032</i> | Down | 0.41 | 2.51E-05 | 4.32E-04 |
| <i>KRT36</i>      | Down | 0.40 | 2.59E-05 | 4.45E-04 |
| <i>IL19</i>       | Up   | 2.18 | 2.68E-05 | 4.59E-04 |
| <i>HTR3D</i>      | Down | 0.33 | 2.76E-05 | 4.70E-04 |
| <i>SNAR-G1</i>    | Down | 0.25 | 2.93E-05 | 4.94E-04 |
| <i>BTG4</i>       | Down | 0.39 | 2.93E-05 | 4.94E-04 |
| <i>ABCA17P</i>    | Down | 0.47 | 2.97E-05 | 4.99E-04 |
| <i>LIPJ</i>       | Down | 0.38 | 3.00E-05 | 5.02E-04 |
| <i>GPR55</i>      | Down | 0.50 | 3.00E-05 | 5.02E-04 |
| <i>POTEH</i>      | Down | 0.32 | 3.09E-05 | 5.14E-04 |
| <i>POTEG</i>      | Down | 0.32 | 3.13E-05 | 5.18E-04 |
| <i>NKAIN3</i>     | Down | 0.34 | 3.15E-05 | 5.19E-04 |
| <i>BMP5</i>       | Down | 0.30 | 3.22E-05 | 5.30E-04 |
| <i>VCX3A</i>      | Down | 0.47 | 3.22E-05 | 5.30E-04 |
| <i>CD177</i>      | Down | 0.49 | 3.32E-05 | 5.45E-04 |
| <i>LMO1</i>       | Up   | 2.46 | 3.33E-05 | 5.46E-04 |
| <i>SCN7A</i>      | Up   | 2.27 | 3.63E-05 | 5.83E-04 |
| <i>HAND1</i>      | Down | 0.25 | 3.78E-05 | 6.03E-04 |

|                     |      |      |          |          |
|---------------------|------|------|----------|----------|
| <i>FLJ45983</i>     | Down | 0.31 | 3.82E-05 | 6.07E-04 |
| <i>DMRTA2</i>       | Up   | 2.03 | 3.87E-05 | 6.14E-04 |
| <i>UPK1A</i>        | Down | 0.45 | 3.90E-05 | 6.17E-04 |
| <i>SYN2</i>         | Down | 0.45 | 3.90E-05 | 6.17E-04 |
| <i>PHF21B</i>       | Down | 0.48 | 3.94E-05 | 6.20E-04 |
| <i>TRPM5</i>        | Down | 0.48 | 4.01E-05 | 6.31E-04 |
| <i>NKX2-1</i>       | Up   | 4.76 | 4.10E-05 | 6.42E-04 |
| <i>LHX9</i>         | Up   | 2.74 | 4.11E-05 | 6.44E-04 |
| <i>VGLL1</i>        | Down | 0.48 | 4.14E-05 | 6.47E-04 |
| <i>TDRD1</i>        | Down | 0.49 | 4.23E-05 | 6.56E-04 |
| <i>SST</i>          | Down | 0.34 | 4.29E-05 | 6.63E-04 |
| <i>PCDH15</i>       | Down | 0.31 | 4.40E-05 | 6.78E-04 |
| <i>LOC340508</i>    | Down | 0.39 | 4.41E-05 | 6.79E-04 |
| <i>GABRB2</i>       | Down | 0.48 | 4.46E-05 | 6.85E-04 |
| <i>PNOC</i>         | Down | 0.44 | 4.75E-05 | 7.21E-04 |
| <i>C20orf103</i>    | Down | 0.48 | 4.77E-05 | 7.24E-04 |
| <i>PAH</i>          | Down | 0.31 | 4.89E-05 | 7.37E-04 |
| <i>PTPRZ1</i>       | Down | 0.36 | 4.91E-05 | 7.39E-04 |
| <i>SMPX</i>         | Down | 0.30 | 4.92E-05 | 7.40E-04 |
| <i>CYP24A1</i>      | Up   | 2.21 | 4.93E-05 | 7.40E-04 |
| <i>PVALB</i>        | Down | 0.45 | 4.94E-05 | 7.41E-04 |
| <i>PKP1</i>         | Down | 0.42 | 5.11E-05 | 7.62E-04 |
| <i>CCK</i>          | Down | 0.36 | 5.16E-05 | 7.67E-04 |
| <i>CHST9</i>        | Down | 0.43 | 5.25E-05 | 7.77E-04 |
| <i>CDX2</i>         | Down | 0.34 | 5.32E-05 | 7.87E-04 |
| <i>DSG4</i>         | Down | 0.35 | 5.57E-05 | 8.15E-04 |
| <i>SPINK5</i>       | Down | 0.49 | 5.76E-05 | 8.40E-04 |
| <i>ZNF716</i>       | Down | 0.32 | 5.80E-05 | 8.44E-04 |
| <i>OR56A3</i>       | Down | 0.21 | 5.84E-05 | 8.48E-04 |
| <i>ONECUT3</i>      | Up   | 3.15 | 6.04E-05 | 8.73E-04 |
| <i>ROPN1B</i>       | Down | 0.48 | 6.12E-05 | 8.82E-04 |
| <i>KRT83</i>        | Down | 0.44 | 6.20E-05 | 8.91E-04 |
| <i>CSTL1</i>        | Down | 0.41 | 6.42E-05 | 9.19E-04 |
| <i>CHL1</i>         | Down | 0.47 | 7.04E-05 | 9.96E-04 |
| <i>SPAG11A</i>      | Down | 0.33 | 7.10E-05 | 1.00E-03 |
| <i>IGDCC3</i>       | Down | 0.47 | 7.13E-05 | 1.00E-03 |
| <i>ROS1</i>         | Down | 0.43 | 7.27E-05 | 1.02E-03 |
| <i>LOC389332</i>    | Up   | 2.03 | 7.28E-05 | 1.02E-03 |
| <i>ABCG8</i>        | Down | 0.45 | 7.35E-05 | 1.03E-03 |
| <i>LOC100240726</i> | Down | 0.26 | 7.54E-05 | 1.04E-03 |
| <i>TMPRSS6</i>      | Down | 0.50 | 7.66E-05 | 1.06E-03 |
| <i>OR2T8</i>        | Down | 0.33 | 7.80E-05 | 1.07E-03 |
| <i>KLK2</i>         | Down | 0.43 | 7.95E-05 | 1.09E-03 |
| <i>ADCY8</i>        | Down | 0.18 | 8.37E-05 | 1.13E-03 |
| <i>SLC5A12</i>      | Down | 0.42 | 8.47E-05 | 1.15E-03 |
| <i>TMEM63C</i>      | Down | 0.48 | 8.50E-05 | 1.15E-03 |
| <i>SOX11</i>        | Down | 0.45 | 8.53E-05 | 1.15E-03 |
| <i>SAGE1</i>        | Down | 0.25 | 8.57E-05 | 1.16E-03 |
| <i>OTOP1</i>        | Down | 0.26 | 8.64E-05 | 1.16E-03 |
| <i>SNORA74A</i>     | Down | 0.48 | 8.68E-05 | 1.17E-03 |

|                     |      |      |          |          |
|---------------------|------|------|----------|----------|
| <i>SLC12A1</i>      | Down | 0.46 | 8.84E-05 | 1.19E-03 |
| <i>TRIM71</i>       | Down | 0.33 | 8.94E-05 | 1.19E-03 |
| <i>CALHM3</i>       | Down | 0.46 | 9.72E-05 | 1.28E-03 |
| <i>SFRP2</i>        | Up   | 2.24 | 9.74E-05 | 1.28E-03 |
| <i>NRG3</i>         | Down | 0.41 | 9.75E-05 | 1.28E-03 |
| <i>SLC19A3</i>      | Down | 0.48 | 9.78E-05 | 1.28E-03 |
| <i>PIRT</i>         | Down | 0.44 | 1.01E-04 | 1.31E-03 |
| <i>ANKRD34B</i>     | Down | 0.41 | 1.02E-04 | 1.32E-03 |
| <i>MOBP</i>         | Down | 0.48 | 1.02E-04 | 1.32E-03 |
| <i>LOC100131726</i> | Down | 0.44 | 1.05E-04 | 1.36E-03 |
| <i>BET3L</i>        | Up   | 2.89 | 1.10E-04 | 1.41E-03 |
| <i>FOXB1</i>        | Down | 0.38 | 1.13E-04 | 1.44E-03 |
| <i>NKX6-2</i>       | Down | 0.19 | 1.13E-04 | 1.44E-03 |
| <i>CXCL1</i>        | Down | 0.50 | 1.14E-04 | 1.45E-03 |
| <i>PRRG3</i>        | Down | 0.41 | 1.16E-04 | 1.46E-03 |
| <i>C1orf87</i>      | Down | 0.34 | 1.21E-04 | 1.52E-03 |
| <i>TLX3</i>         | Up   | 2.81 | 1.25E-04 | 1.56E-03 |
| <i>C1QL2</i>        | Down | 0.30 | 1.32E-04 | 1.63E-03 |
| <i>VPREB1</i>       | Down | 0.12 | 1.32E-04 | 1.63E-03 |
| <i>DRD1</i>         | Down | 0.43 | 1.33E-04 | 1.64E-03 |
| <i>MYL10</i>        | Down | 0.34 | 1.33E-04 | 1.64E-03 |
| <i>PRODH</i>        | Up   | 2.06 | 1.35E-04 | 1.66E-03 |
| <i>SLC24A2</i>      | Down | 0.36 | 1.37E-04 | 1.67E-03 |
| <i>RBP4</i>         | Down | 0.48 | 1.39E-04 | 1.70E-03 |
| <i>C6orf146</i>     | Down | 0.33 | 1.44E-04 | 1.75E-03 |
| <i>PGLYRP4</i>      | Down | 0.42 | 1.45E-04 | 1.75E-03 |
| <i>CYP4F3</i>       | Up   | 2.23 | 1.51E-04 | 1.82E-03 |
| <i>ARHGAP36</i>     | Down | 0.42 | 1.52E-04 | 1.83E-03 |
| <i>SPERT</i>        | Down | 0.44 | 1.52E-04 | 1.84E-03 |
| <i>CTAG1B</i>       | Down | 0.16 | 1.53E-04 | 1.84E-03 |
| <i>COX6A2</i>       | Down | 0.28 | 1.54E-04 | 1.85E-03 |
| <i>SNORA11</i>      | Down | 0.46 | 1.56E-04 | 1.86E-03 |
| <i>STOML3</i>       | Down | 0.42 | 1.56E-04 | 1.86E-03 |
| <i>CRISP3</i>       | Down | 0.44 | 1.58E-04 | 1.89E-03 |
| <i>FAM46D</i>       | Down | 0.46 | 1.60E-04 | 1.90E-03 |
| <i>NPPC</i>         | Up   | 2.19 | 1.62E-04 | 1.93E-03 |
| <i>SERPINA6</i>     | Down | 0.42 | 1.63E-04 | 1.93E-03 |
| <i>LOC389493</i>    | Down | 0.42 | 1.67E-04 | 1.97E-03 |
| <i>MGC2889</i>      | Down | 0.50 | 1.70E-04 | 1.99E-03 |
| <i>ODZ1</i>         | Down | 0.42 | 1.73E-04 | 2.02E-03 |
| <i>PIP</i>          | Down | 0.35 | 1.73E-04 | 2.03E-03 |
| <i>C3orf16</i>      | Down | 0.41 | 1.75E-04 | 2.05E-03 |
| <i>SPRR2A</i>       | Down | 0.34 | 1.77E-04 | 2.06E-03 |
| <i>MAGEA10</i>      | Down | 0.17 | 1.79E-04 | 2.08E-03 |
| <i>GRM5</i>         | Down | 0.45 | 1.79E-04 | 2.08E-03 |
| <i>IL24</i>         | Up   | 2.06 | 1.85E-04 | 2.13E-03 |
| <i>PLA2G4E</i>      | Down | 0.45 | 1.86E-04 | 2.14E-03 |
| <i>PCDH20</i>       | Up   | 2.01 | 1.86E-04 | 2.14E-03 |
| <i>TBX1</i>         | Up   | 2.12 | 1.93E-04 | 2.20E-03 |
| <i>C10orf53</i>     | Down | 0.35 | 1.98E-04 | 2.25E-03 |

|                  |      |      |          |          |
|------------------|------|------|----------|----------|
| <i>CXorf49B</i>  | Down | 0.49 | 1.99E-04 | 2.26E-03 |
| <i>SLC38A8</i>   | Down | 0.43 | 2.01E-04 | 2.28E-03 |
| <i>SHISA6</i>    | Down | 0.47 | 2.04E-04 | 2.31E-03 |
| <i>KRT72</i>     | Down | 0.28 | 2.08E-04 | 2.34E-03 |
| <i>LOC284551</i> | Down | 0.44 | 2.14E-04 | 2.41E-03 |
| <i>SOX21</i>     | Down | 0.30 | 2.20E-04 | 2.46E-03 |
| <i>MAGEA12</i>   | Down | 0.32 | 2.22E-04 | 2.48E-03 |
| <i>MC3R</i>      | Down | 0.25 | 2.30E-04 | 2.55E-03 |
| <i>MAEL</i>      | Down | 0.45 | 2.33E-04 | 2.56E-03 |
| <i>KRTAP4-1</i>  | Down | 0.30 | 2.35E-04 | 2.58E-03 |
| <i>LOC150527</i> | Down | 0.39 | 2.38E-04 | 2.61E-03 |
| <i>HS3ST5</i>    | Down | 0.45 | 2.39E-04 | 2.61E-03 |
| <i>DPPA2</i>     | Up   | 2.44 | 2.39E-04 | 2.62E-03 |
| <i>C3orf55</i>   | Down | 0.35 | 2.41E-04 | 2.62E-03 |
| <i>LOC153910</i> | Down | 0.31 | 2.47E-04 | 2.67E-03 |
| <i>PIWIL1</i>    | Down | 0.49 | 2.51E-04 | 2.71E-03 |
| <i>C11orf88</i>  | Down | 0.40 | 2.54E-04 | 2.73E-03 |
| <i>CYP26C1</i>   | Down | 0.43 | 2.61E-04 | 2.80E-03 |
| <i>SRRM4</i>     | Down | 0.44 | 2.64E-04 | 2.82E-03 |
| <i>PKHD1L1</i>   | Down | 0.47 | 2.67E-04 | 2.84E-03 |
| <i>XAGE1D</i>    | Down | 0.23 | 2.69E-04 | 2.86E-03 |
| <i>PEX5L</i>     | Down | 0.47 | 2.96E-04 | 3.08E-03 |
| <i>CTSG</i>      | Down | 0.44 | 2.97E-04 | 3.09E-03 |
| <i>NHLH2</i>     | Down | 0.36 | 2.97E-04 | 3.09E-03 |
| <i>KLK3</i>      | Down | 0.43 | 3.04E-04 | 3.15E-03 |
| <i>KRT13</i>     | Down | 0.48 | 3.17E-04 | 3.26E-03 |
| <i>NRSN1</i>     | Down | 0.49 | 3.18E-04 | 3.26E-03 |
| <i>TBX4</i>      | Down | 0.50 | 3.22E-04 | 3.29E-03 |
| <i>DMRTC2</i>    | Down | 0.43 | 3.27E-04 | 3.34E-03 |
| <i>ASCL4</i>     | Down | 0.30 | 3.32E-04 | 3.37E-03 |
| <i>RETN</i>      | Down | 0.50 | 3.38E-04 | 3.42E-03 |
| <i>PRSS33</i>    | Down | 0.45 | 3.39E-04 | 3.43E-03 |
| <i>LY6G6F</i>    | Down | 0.42 | 3.43E-04 | 3.45E-03 |
| <i>NDST4</i>     | Up   | 3.11 | 3.45E-04 | 3.46E-03 |
| <i>MDGA2</i>     | Down | 0.46 | 3.48E-04 | 3.48E-03 |
| <i>RAD51AP2</i>  | Down | 0.46 | 3.49E-04 | 3.49E-03 |
| <i>GAB4</i>      | Down | 0.18 | 3.60E-04 | 3.58E-03 |
| <i>LOC729668</i> | Down | 0.44 | 3.68E-04 | 3.65E-03 |
| <i>CPN1</i>      | Up   | 2.64 | 3.73E-04 | 3.69E-03 |
| <i>PGK2</i>      | Down | 0.49 | 3.88E-04 | 3.80E-03 |
| <i>TAS2R43</i>   | Down | 0.48 | 3.94E-04 | 3.84E-03 |
| <i>GABRG1</i>    | Down | 0.25 | 4.10E-04 | 3.98E-03 |
| <i>UCP1</i>      | Down | 0.45 | 4.12E-04 | 3.99E-03 |
| <i>RIMS1</i>     | Down | 0.47 | 4.19E-04 | 4.04E-03 |
| <i>DRD5</i>      | Down | 0.47 | 4.20E-04 | 4.05E-03 |
| <i>C13orf26</i>  | Down | 0.22 | 4.21E-04 | 4.06E-03 |
| <i>MAGEC3</i>    | Down | 0.33 | 4.56E-04 | 4.32E-03 |
| <i>ZDHHC22</i>   | Down | 0.40 | 4.59E-04 | 4.32E-03 |
| <i>REG1A</i>     | Down | 0.41 | 4.60E-04 | 4.33E-03 |
| <i>NR1H4</i>     | Up   | 3.04 | 4.62E-04 | 4.34E-03 |

**Supplementary Table 7. Details for 876 genes differentially expressed between assumed somatic MMR deficient and MMR proficient endometrioid tumors.**

| Gene            | Up/ own regulated in somatic MMR deficient tumours | Fold change | -value   | Adjusted -value |
|-----------------|----------------------------------------------------|-------------|----------|-----------------|
| <i>MLH1</i>     | Down                                               | 0.24        | 3.05E-64 | 6.09E-60        |
| <i>EPM2AIP1</i> | Down                                               | 0.23        | 1.70E-56 | 1.70E-52        |
| <i>TRH</i>      | Down                                               | 0.02        | 5.53E-44 | 3.68E-40        |
| <i>MYH7B</i>    | Down                                               | 0.08        | 1.47E-36 | 7.32E-33        |
| <i>RNLS</i>     | Down                                               | 0.26        | 1.35E-34 | 5.40E-31        |
| <i>NTS</i>      | Up                                                 | 23.81       | 3.20E-30 | 1.06E-26        |
| <i>CACNA1S</i>  | Down                                               | 0.04        | 3.04E-27 | 8.67E-24        |
| <i>SPAG6</i>    | Down                                               | 0.03        | 5.21E-27 | 1.30E-23        |
| <i>WNT16</i>    | Down                                               | 0.10        | 1.18E-26 | 2.61E-23        |
| <i>WNT6</i>     | Down                                               | 0.16        | 7.99E-25 | 1.59E-21        |
| <i>SLC13A5</i>  | Down                                               | 0.12        | 1.57E-24 | 2.84E-21        |
| <i>FGF8</i>     | Down                                               | 0.09        | 4.82E-23 | 8.00E-20        |
| <i>SEZ6L</i>    | Down                                               | 0.07        | 6.85E-23 | 1.05E-19        |
| <i>MUCL1</i>    | Down                                               | 0.07        | 1.30E-22 | 1.85E-19        |
| <i>DEFA5</i>    | Down                                               | 0.01        | 2.16E-22 | 2.88E-19        |
| <i>ZNF300</i>   | Down                                               | 0.24        | 3.72E-22 | 4.64E-19        |
| <i>IQCA1</i>    | Down                                               | 0.20        | 4.61E-22 | 5.11E-19        |
| <i>CPXM2</i>    | Down                                               | 0.27        | 1.67E-21 | 1.75E-18        |
| <i>CST2</i>     | Down                                               | 0.11        | 2.65E-21 | 2.64E-18        |
| <i>NKD1</i>     | Down                                               | 0.19        | 3.34E-21 | 3.17E-18        |
| <i>ADAMTSL2</i> | Down                                               | 0.24        | 2.06E-20 | 1.87E-17        |
| <i>FMO2</i>     | Down                                               | 0.14        | 5.32E-20 | 4.62E-17        |
| <i>CYTL1</i>    | Down                                               | 0.19        | 1.08E-19 | 9.01E-17        |
| <i>DBH</i>      | Down                                               | 0.15        | 2.54E-19 | 2.03E-16        |
| <i>NEFH</i>     | Down                                               | 0.19        | 3.84E-19 | 2.95E-16        |
| <i>TMEM163</i>  | Down                                               | 0.31        | 1.05E-18 | 7.77E-16        |
| <i>CST1</i>     | Down                                               | 0.11        | 1.52E-18 | 1.09E-15        |
| <i>ZNF662</i>   | Down                                               | 0.33        | 3.76E-18 | 2.59E-15        |
| <i>CACNA2D3</i> | Down                                               | 0.31        | 8.39E-18 | 5.58E-15        |
| <i>LIX1</i>     | Down                                               | 0.14        | 1.12E-17 | 6.84E-15        |
| <i>C4orf39</i>  | Down                                               | 0.29        | 1.12E-17 | 6.84E-15        |
| <i>RGS22</i>    | Down                                               | 0.18        | 1.13E-17 | 6.84E-15        |
| <i>PRPH</i>     | Up                                                 | 3.96        | 1.36E-17 | 7.97E-15        |
| <i>TSHZ1</i>    | Up                                                 | 2.01        | 1.59E-17 | 9.08E-15        |
| <i>EIF5A2</i>   | Down                                               | 0.35        | 2.08E-17 | 1.12E-14        |
| <i>LRRC4C</i>   | Down                                               | 0.25        | 2.88E-17 | 1.51E-14        |
| <i>SLFN13</i>   | Down                                               | 0.33        | 3.11E-17 | 1.59E-14        |
| <i>C7orf13</i>  | Down                                               | 0.36        | 3.45E-17 | 1.72E-14        |
| <i>GPR155</i>   | Down                                               | 0.40        | 4.52E-17 | 2.20E-14        |
| <i>BMP4</i>     | Down                                               | 0.25        | 7.47E-17 | 3.55E-14        |
| <i>CHRNA3</i>   | Down                                               | 0.22        | 8.54E-17 | 3.96E-14        |
| <i>KLK4</i>     | Down                                               | 0.17        | 1.28E-16 | 5.79E-14        |
| <i>DPEP1</i>    | Down                                               | 0.19        | 1.60E-16 | 7.10E-14        |
| <i>CST4</i>     | Down                                               | 0.13        | 1.85E-16 | 8.01E-14        |



|                     |      |      |          |      |
|---------------------|------|------|----------|------|
| <i>MCCD1</i>        | Down | 0.36 | 1.51E-03 | 0.01 |
| <i>GATA5</i>        | Down | 0.40 | 1.56E-03 | 0.01 |
| <i>CACNG5</i>       | Down | 0.35 | 1.56E-03 | 0.01 |
| <i>CGA</i>          | Up   | 2.62 | 1.62E-03 | 0.01 |
| <i>IL1F7</i>        | Up   | 2.08 | 1.63E-03 | 0.01 |
| <i>KRTAP9-4</i>     | Down | 0.36 | 1.67E-03 | 0.01 |
| <i>C21orf121</i>    | Down | 0.48 | 1.69E-03 | 0.01 |
| <i>CHRNA2</i>       | Down | 0.37 | 1.69E-03 | 0.01 |
| <i>LCN8</i>         | Down | 0.49 | 1.72E-03 | 0.01 |
| <i>CFHR5</i>        | Down | 0.19 | 1.98E-03 | 0.01 |
| <i>DGKK</i>         | Up   | 2.42 | 1.98E-03 | 0.01 |
| <i>LY6G6D</i>       | Down | 0.40 | 2.01E-03 | 0.01 |
| <i>ARX</i>          | Up   | 2.46 | 2.08E-03 | 0.01 |
| <i>KRTAP3-2</i>     | Down | 0.28 | 2.11E-03 | 0.01 |
| <i>OTC</i>          | Down | 0.43 | 2.15E-03 | 0.01 |
| <i>UCMA</i>         | Down | 0.34 | 2.20E-03 | 0.01 |
| <i>IL17A</i>        | Up   | 3.37 | 2.24E-03 | 0.01 |
| <i>CRABP1</i>       | Down | 0.49 | 2.31E-03 | 0.02 |
| <i>INSL4</i>        | Up   | 3.20 | 2.38E-03 | 0.02 |
| <i>ZFP42</i>        | Down | 0.27 | 2.41E-03 | 0.02 |
| <i>PGC</i>          | Down | 0.48 | 2.46E-03 | 0.02 |
| <i>FRMPD4</i>       | Down | 0.33 | 2.47E-03 | 0.02 |
| <i>GPR26</i>        | Down | 0.40 | 2.55E-03 | 0.02 |
| <i>NAA11</i>        | Down | 0.26 | 2.58E-03 | 0.02 |
| <i>PRR21</i>        | Down | 0.35 | 2.60E-03 | 0.02 |
| <i>MKRN3</i>        | Down | 0.40 | 2.64E-03 | 0.02 |
| <i>UGT2A3</i>       | Up   | 2.60 | 2.66E-03 | 0.02 |
| <i>PLD5</i>         | Up   | 2.03 | 2.67E-03 | 0.02 |
| <i>C2orf71</i>      | Down | 0.49 | 2.96E-03 | 0.02 |
| <i>IGFL1</i>        | Down | 0.48 | 3.04E-03 | 0.02 |
| <i>SEC14L3</i>      | Down | 0.47 | 3.26E-03 | 0.02 |
| <i>OR2T12</i>       | Down | 0.33 | 3.37E-03 | 0.02 |
| <i>KLK15</i>        | Down | 0.46 | 3.40E-03 | 0.02 |
| <i>PRTN3</i>        | Up   | 2.04 | 3.42E-03 | 0.02 |
| <i>GRIA1</i>        | Down | 0.48 | 3.53E-03 | 0.02 |
| <i>NPY</i>          | Down | 0.41 | 3.65E-03 | 0.02 |
| <i>CEACAM7</i>      | Down | 0.47 | 3.93E-03 | 0.02 |
| <i>CLEC4M</i>       | Down | 0.48 | 4.05E-03 | 0.02 |
| <i>LOC100192426</i> | Down | 0.48 | 4.16E-03 | 0.02 |
| <i>CRISP2</i>       | Down | 0.34 | 4.37E-03 | 0.02 |
| <i>BTBD17</i>       | Down | 0.36 | 4.41E-03 | 0.03 |
| <i>HSPC072</i>      | Down | 0.49 | 4.52E-03 | 0.03 |
| <i>LYZL2</i>        | Down | 0.46 | 4.58E-03 | 0.03 |
| <i>SERPINA10</i>    | Down | 0.44 | 4.78E-03 | 0.03 |
| <i>C9orf71</i>      | Up   | 2.14 | 4.83E-03 | 0.03 |
| <i>NKX2-5</i>       | Down | 0.48 | 4.94E-03 | 0.03 |
| <i>CRYGC</i>        | Up   | 2.78 | 5.56E-03 | 0.03 |
| <i>SPINK6</i>       | Down | 0.32 | 5.57E-03 | 0.03 |
| <i>TMEM229A</i>     | Down | 0.44 | 5.69E-03 | 0.03 |
| <i>PRSS41</i>       | Down | 0.45 | 5.78E-03 | 0.03 |

|                     |      |      |          |      |
|---------------------|------|------|----------|------|
| <i>GPHB5</i>        | Down | 0.35 | 5.89E-03 | 0.03 |
| <i>AGXT2</i>        | Down | 0.40 | 5.92E-03 | 0.03 |
| <i>RTL1</i>         | Up   | 2.74 | 6.15E-03 | 0.03 |
| <i>GH1</i>          | Down | 0.41 | 6.23E-03 | 0.03 |
| <i>CFHR2</i>        | Down | 0.14 | 6.32E-03 | 0.03 |
| <i>SIM1</i>         | Down | 0.43 | 6.51E-03 | 0.03 |
| <i>MAGEC2</i>       | Down | 0.21 | 6.52E-03 | 0.03 |
| <i>TINAG</i>        | Up   | 2.59 | 6.53E-03 | 0.03 |
| <i>TSPAN19</i>      | Down | 0.41 | 6.73E-03 | 0.03 |
| <i>LOC100133469</i> | Down | 0.25 | 6.77E-03 | 0.03 |
| <i>CRYBA4</i>       | Down | 0.47 | 6.77E-03 | 0.03 |
| <i>CARTPT</i>       | Down | 0.35 | 7.22E-03 | 0.04 |
| <i>ALX4</i>         | Down | 0.44 | 7.41E-03 | 0.04 |
| <i>IRX4</i>         | Up   | 2.80 | 7.47E-03 | 0.04 |
| <i>HTA</i>          | Down | 0.48 | 7.56E-03 | 0.04 |
| <i>CRH</i>          | Down | 0.21 | 7.88E-03 | 0.04 |
| <i>GNASAS</i>       | Down | 0.49 | 8.70E-03 | 0.04 |
| <i>KRT27</i>        | Down | 0.45 | 9.16E-03 | 0.04 |
| <i>GPR123</i>       | Down | 0.47 | 9.23E-03 | 0.04 |
| <i>CT45A4</i>       | Down | 0.43 | 9.50E-03 | 0.04 |
| <i>GPR12</i>        | Down | 0.31 | 9.73E-03 | 0.05 |
| <i>TLX1NB</i>       | Up   | 2.85 | 9.83E-03 | 0.05 |
| <i>TMPRSS11D</i>    | Down | 0.46 | 9.85E-03 | 0.05 |
| <i>MYT1L</i>        | Down | 0.41 | 9.98E-03 | 0.05 |
| <i>C17orf73</i>     | Up   | 2.12 | 0.01     | 0.05 |
| <i>SOX14</i>        | Down | 0.45 | 0.01     | 0.05 |
| <i>MAGEC1</i>       | Down | 0.22 | 0.01     | 0.05 |
| <i>POU3F2</i>       | Down | 0.47 | 0.01     | 0.05 |
| <i>OR1N1</i>        | Down | 0.35 | 0.01     | 0.05 |
| <i>SCGB3A2</i>      | Down | 0.41 | 0.01     | 0.05 |
| <i>PROKR2</i>       | Down | 0.28 | 0.01     | 0.05 |
| <i>EVX1</i>         | Down | 0.42 | 0.01     | 0.05 |

---
